# Supplementary material for: Efficacy of iron supplementation on fatigue and physical capacity in non-anaemic iron-deficient adults: a systematic review of randomised controlled trials
Source: PubMed Central journal article supplement — BMJ Open. 2018 Apr 5;8(4):e019240. doi: 10.1136/bmjopen-2017-019240 (PMC5892776; doi:10.1136/bmjopen-2017-019240), 2018-04-05
Supplement: bmjopen-2017-019240.draft_revisions.pdf [file bmjopen-2017-019240.draft_revisions.pdf]

# BMJ Open

BMJ Open is committed to open peer review. As part of this commitment we make the peer review history of every article we publish publicly available.

When an article is published we post the peer reviewers' comments and the authors' responses online. We also post the versions of the paper that were used during peer review. These are the versions that the peer review comments apply to.

The versions of the paper that follow are the versions that were submitted during the peer review process. They are not the versions of record or the final published versions. They should not be cited or distributed as the published version of this manuscript.

BMJ Open is an open access journal and the full, final, typeset and author-corrected version of record of the manuscript is available on our site with no access controls, subscription charges or pay-per-view fees (<http://bmjopen.bmj.com>).

If you have any questions on BMJ Open's open peer review process please email [info.bmjopen@bmj.com](mailto:info.bmjopen@bmj.com)

# BMJ Open

## Efficacy of iron therapy on fatigue and work capacity in non-anemic iron deficient adults: a systematic review of randomized controlled trials

|                                 |                                                                                                                                                                                                                                                                                                                                                                                                                                                                                                                                                                                                                                                                                                                                                                                                                                                                                                                                                                                                                                                                                                                                                                                              |
|---------------------------------|----------------------------------------------------------------------------------------------------------------------------------------------------------------------------------------------------------------------------------------------------------------------------------------------------------------------------------------------------------------------------------------------------------------------------------------------------------------------------------------------------------------------------------------------------------------------------------------------------------------------------------------------------------------------------------------------------------------------------------------------------------------------------------------------------------------------------------------------------------------------------------------------------------------------------------------------------------------------------------------------------------------------------------------------------------------------------------------------------------------------------------------------------------------------------------------------|
| Journal:                        | <i>BMJ Open</i>                                                                                                                                                                                                                                                                                                                                                                                                                                                                                                                                                                                                                                                                                                                                                                                                                                                                                                                                                                                                                                                                                                                                                                              |
| Manuscript ID                   | bmjopen-2017-019240                                                                                                                                                                                                                                                                                                                                                                                                                                                                                                                                                                                                                                                                                                                                                                                                                                                                                                                                                                                                                                                                                                                                                                          |
| Article Type:                   | Research                                                                                                                                                                                                                                                                                                                                                                                                                                                                                                                                                                                                                                                                                                                                                                                                                                                                                                                                                                                                                                                                                                                                                                                     |
| Date Submitted by the Author:   | 11-Sep-2017                                                                                                                                                                                                                                                                                                                                                                                                                                                                                                                                                                                                                                                                                                                                                                                                                                                                                                                                                                                                                                                                                                                                                                                  |
| Complete List of Authors:       | Houston, Brett; University of Manitoba / CancerCare Manitoba, Hematology and Medical Oncology<br>Hurrie, Daryl; University of Manitoba<br>Graham, Jeff; University of Manitoba / CancerCare Manitoba, Hematology and Medical Oncology<br>Perija, Brittany; University of Manitoba, Department of Internal Medicine<br>Rimmer, Emily; University of Manitoba / CancerCare Manitoba, Hematology and Medical Oncology<br>Rabbani, Rasheda; University of Manitoba and George & Fay Yee Center for Healthcare Innovation<br>Bernstein, Charles; University of Manitoba, Gastroenterology<br>Turgeon, Alexis; Centre de Recherche du Centre Hospitalier Affilié Universitaire de Québec (CHA), Axe Traumatologie-urgence-soins intensifs, CHA-Hôpital de l'Enfant-Jésus, Université Laval, Anesthesia and Critical Care Medicine<br>Fergusson, Dean; Ottawa Hospital Research Institute<br>Houston, Donald; University of Manitoba / CancerCare Manitoba, Hematology and Medical Oncology<br>Abou-Setta, Ahmed; University of Manitoba and George & Fay Yee Center for Healthcare Innovation<br>Zarychanski, Ryan ; University of Manitoba / CancerCare Manitoba, Hematology and Medical Oncology |
| <b>Primary Subject Heading</b>: | Evidence based practice                                                                                                                                                                                                                                                                                                                                                                                                                                                                                                                                                                                                                                                                                                                                                                                                                                                                                                                                                                                                                                                                                                                                                                      |
| Secondary Subject Heading:      | Epidemiology, General practice / Family practice, Haematology (incl blood transfusion), Pharmacology and therapeutics, Global health                                                                                                                                                                                                                                                                                                                                                                                                                                                                                                                                                                                                                                                                                                                                                                                                                                                                                                                                                                                                                                                         |
| Keywords:                       | Iron deficiency, Iron supplementation, Fatigue, Exercise capacity, Systematic review                                                                                                                                                                                                                                                                                                                                                                                                                                                                                                                                                                                                                                                                                                                                                                                                                                                                                                                                                                                                                                                                                                         |
|                                 |                                                                                                                                                                                                                                                                                                                                                                                                                                                                                                                                                                                                                                                                                                                                                                                                                                                                                                                                                                                                                                                                                                                                                                                              |

SCHOLARONE™  
Manuscripts

# Efficacy of iron therapy on fatigue and work capacity in non-anemic iron deficient adults: a systematic review of randomized controlled trials

Brett L. Houston<sup>1,2</sup>, Daryl Hurrie<sup>3</sup>, Jeff Graham<sup>1,2</sup>, Brittany Perija<sup>4</sup>, Emily Rimmer<sup>1,2</sup>, Rasheda Rabbani<sup>5,6</sup>, Charles N. Bernstein<sup>7</sup>, Alexis Turgeon<sup>8</sup>, Dean Fergusson<sup>9</sup>, Donald S. Houston<sup>1,2</sup>, Ahmed M. Abou-Setta<sup>5,6</sup>, Ryan Zarychanski<sup>1,2,5,6</sup>

<sup>1</sup>Department of Internal Medicine, Section of Medical Oncology and Haematology, University of Manitoba, Winnipeg, Manitoba, Canada

<sup>2</sup>Department of Medical Oncology and Haematology, CancerCare Manitoba, Winnipeg, Manitoba, Canada.

<sup>3</sup>Applied Health Sciences, Faculty of Kinesiology and Recreation Management, University of Manitoba, Winnipeg, Manitoba, Canada

<sup>4</sup>Department of Internal Medicine, Faculty of Medicine, University of Manitoba, Winnipeg, Manitoba, Canada

<sup>5</sup>George & Fay Yee Center for Healthcare Innovation, University of Manitoba/Winnipeg Regional Health Authority, Winnipeg, Manitoba, Canada

<sup>6</sup>Department of Community Health Sciences, University of Manitoba, Winnipeg, Manitoba, Canada

<sup>7</sup>Department of Internal Medicine, Section of Gastroenterology, University of Manitoba, Winnipeg, Manitoba, Canada

<sup>8</sup>Centre de recherche du CHU de Québec – Université Laval, Population Health and Optimal Health Practices Research Unit, Trauma - Emergency - Critical Care Medicine; Department of Anesthesiology and Critical Care Medicine, Division of Critical Care Medicine, Faculty of Medicine, Université Laval, Québec City, Québec, Canada.

<sup>9</sup>Clinical Epidemiology Program, Ottawa Hospital Research Institute (OHRI); Department of Medicine, University of Ottawa, Ottawa, Ontario, Canada

**Corresponding author:** Ryan Zarychanski  
ON 2051-675 McDermot Avenue  
CancerCare Manitoba  
Winnipeg, Manitoba, R3E OV9  
T: 204-787-2108  
F: 204-786-0196  
rzarychanski@cancercare.mb.ca

**Short title:** Iron therapy and fatigue

**Document data:** Abstract: 250 words; Text: 2773 words; Figures: 2; Tables: 2; Appendices: 10; References: 40

**Systematic Review Registration:** PROSPERO (CRD42014007085)

1  
2  
3 **OBJECTIVE:** Iron supplementation in iron deficiency anemia is standard practice, but  
4  
5 the benefits of iron supplementation in iron deficient non-anemic (IDNA) individuals  
6  
7 remains controversial. Our objective is to identify the effects of iron therapy on fatigue  
8  
9 and work capacity in iron deficient non-anemic adults.  
10

11  
12 **DESIGN:** Systematic review and meta-analysis of randomized controlled trials (RCTs)  
13

14  
15 **SETTING:** Primary care  
16

17 **PARTICIPANTS:** Adults ( $\geq 18$  years) who were iron deficient but non-anemic  
18

19 **INTERVENTIONS:** Oral, intramuscular or intravenous iron supplementation; all  
20  
21 therapy doses, frequencies and durations were included. Comparators included placebo or  
22  
23 active therapy.  
24

25  
26 **RESULTS:** We identified RCTs in Medline, Embase, CENTRAL, CINAHL,  
27  
28 SportDiscus, and CAB Abstracts from inception to October 31, 2016. We searched the  
29  
30 World Health Organization's ICTRP for relevant ongoing trials and performed forward  
31  
32 searches of included trials and relevant reviews in Web of Science. We assessed internal  
33  
34 validity of included trials using the Cochrane Risk of Bias tool, and the external validity  
35  
36 using the GRADE methodology. From 11580 citations we included 18 unique trials, and  
37  
38 2 companion papers enrolling 1162 patients. Iron supplementation was associated with  
39  
40 reduced self-reported fatigue (standardized mean difference (SMD) -0.38; 95% CI -0.52  
41  
42 to -0.23;  $I^2$  0%; 4 trials; 714 participants), but was not associated with differences in  
43  
44 objective measures of work capacity, including maximal oxygen consumption ( $VO_2$  max)  
45  
46 (SMD 0.11; 95% CI -0.15 to 0.37;  $I^2$  0%; 9 trials; 235 participants), and timed methods of  
47  
48 exercise testing.  
49  
50  
51  
52  
53  
54  
55  
56  
57  
58  
59  
60

1  
2  
3 **CONCLUSION:** In iron deficient non-anemic adults, iron supplementation is associated  
4  
5 with reduced subjective measures of fatigue, but not with objective improvements in  
6  
7 work capacity. Given the global prevalence of both iron deficiency and fatigue, patients  
8  
9 and practitioners could consider a course of iron supplementation to improve symptoms  
10  
11 of fatigue in presence or absence of documented anemia.  
12  
13

14 **SYSTEMATIC REVIEW REGISTRATION:** PROSPERO (CRD42014007085)  
15  
16  
17  
18  
19  
20  
21  
22  
23  
24  
25  
26  
27  
28  
29  
30  
31  
32  
33  
34  
35  
36  
37  
38  
39  
40  
41  
42  
43  
44  
45  
46  
47  
48  
49  
50  
51  
52  
53  
54  
55  
56  
57  
58  
59  
60

## STUDY STRENGTHS and LIMITATIONS:

### Strengths:

- We used a comprehensive search strategy, an *a priori* protocol, and adhered to established methodological (e.g. PRISMA, GRADE) guidelines
- We identified an at-risk patient population, for whom iron deficiency is highly prevalent, but treatment is unknown
- Our outcomes are clinically relevant and patient centered.

### Limitations:

- In our selected population of iron deficient but not anemic individuals, the majority of studies evaluated healthy females
- In the included trials, tolerability and adverse events of iron therapy was incompletely captured

## INTRODUCTION

Iron deficiency (ID) is estimated to affect two billion people, and is the leading cause of anemia worldwide<sup>1,2</sup>. Iron is necessary for cellular immune responses, oxidative metabolism within the mitochondria, and production of hemoglobin and myoglobin.

When iron losses exceed dietary iron absorption, iron stores become depleted resulting in impaired hemoglobin production and decreased red blood cell hemoglobin content<sup>3</sup>.

Reduction in hemoglobin concentration below a threshold (conventionally defined by the World Health Organization (WHO) as 120g/L for females and 130g/L for males) signifies anemia<sup>4</sup>.

It is well established that anemia results in decreased physical work capacity and increased fatigue proportional to anemia severity<sup>5-9</sup>. Unfortunately, patient-reported fatigue is common in community and primary care settings with a prevalence ranging

1  
2  
3 from 7 to 45%<sup>10</sup>. It is estimated that the indirect annual economic consequence of chronic  
4  
5 fatigue in the United States is 9.1 billion dollars<sup>11</sup>.  
6

7  
8 The clinical relevance of iron deficiency in the absence of anemia is poorly  
9  
10 understood, but may impact well-being, perceptions of fatigue, or contribute to  
11  
12 decrements in physical performance through impairment in biochemical processes  
13  
14 including tissue and mitochondrial oxidative capacity<sup>8</sup>. While iron replacement can  
15  
16 normalize hemoglobin concentration, restore work capacity and improve fatigue in iron  
17  
18 deficiency anemia, it is unclear if supplementation affects fatigue and physical work  
19  
20 capacity in iron deficient but non-anemic (IDNA) individuals. In the absence of  
21  
22 compelling efficacy data on well-being or muscle function, the use of iron supplements  
23  
24 are common in the general population and are routinely recommended to high  
25  
26 performance athletes to enhance performance.  
27  
28  
29

30  
31 Given the global prevalence of iron deficiency and impact of fatigue, the purpose  
32  
33 of this systematic review is to identify, critically appraise and meta-analyse data from  
34  
35 prospective randomized trials evaluating iron therapy in adults with IDNA.  
36  
37  
38  
39

## 40 **METHODS**

41  
42 Using an *a priori* published protocol (CRD42014007085; available at  
43  
44 <https://www.crd.york.ac.uk/PROSPERO/>)<sup>12</sup>, we conducted a systematic review using  
45  
46 methodological approaches outlined in the *Cochrane Handbook for Systematic Reviewers*  
47  
48 and reported according to the Preferred Reporting Items for Systematic Reviews and  
49  
50 Meta-Analysis (PRISMA) criteria<sup>12-14</sup>. A panel of experts from multiple fields (e.g.  
51  
52 internal medicine, hematology, kinesiology, gastroenterology, research methodology)  
53  
54  
55  
56  
57  
58  
59  
60

1  
2  
3 formulated the research question, reviewed search strategies and methods, and provided  
4  
5 input throughout the review process.  
6  
7  
8  
9

## 10 **Populations, Interventions, Comparators, Outcome Measures, Setting and Study**

### 11 **Designs**

12  
13  
14 Our research question was “In iron depleted but non-anemic adults, does iron  
15 supplementation improve fatigue and work capacity.” We included randomized  
16  
17 controlled trials of adults ( $\geq 18$  years) who were iron deficient but non-anemic (**Appendix**  
18  
19 **1**). Interventions included oral, intramuscular or intravenous iron supplementation; all  
20  
21 therapy doses, frequencies and durations were included. We included trials that evaluated  
22  
23 outcomes at least 1 month from the initiation of iron therapy. Comparators included  
24  
25 placebo or active therapy. Our exclusion criteria are presented in **Appendix 2**.  
26  
27  
28  
29

30  
31 Our primary outcome measures were self-reported fatigue and objective measures of  
32  
33 work capacity. Secondary outcomes included the incidence of anemia, change in  
34  
35 hemoglobin concentration and serum ferritin, and the incidence of adverse outcomes  
36  
37 including iron toxicity, constipation, diarrhea, gastrointestinal intolerance and nausea.  
38  
39  
40  
41

### 42 **Search Strategy for Identification of Studies**

43  
44 We searched Medline, Embase, CENTRAL (Cochrane Library), CINAHL,  
45  
46 SportDiscus, and CAB Abstracts from inception to October 31, 2016 to identify relevant  
47  
48 citations of published trials, using individualized systematic search strategies for each  
49  
50 database. The MEDLINE strategy is presented in **Appendix 3**. We searched the World  
51  
52 Health Organization's (WHO) International Clinical Trials Registry Platform (ICTRP),  
53  
54  
55  
56  
57  
58  
59  
60



1  
2  
3 clinicaltrials.gov and relevant conference proceedings to identify planned, ongoing, or  
4 recently completed but unpublished trials. We performed forward searches of included  
5 trials and relevant reviews in Web of Science to identify additional citations, and  
6  
7 contacted study authors to request pertinent unpublished data or provide clarifications on  
8 study methods or results. Reference lists of narrative and systematic reviews and of the  
9 included trials were searched for additional citations. We performed reference  
10 management in EndNote™ (Version X7, Thomson Reuters, Philadelphia, PA, USA).  
11  
12  
13  
14  
15  
16  
17  
18  
19  
20

### 21 **Study Selection, Data Extraction and Quality Assessment**

22  
23  
24  
25  
26 We screened citations, selected studies and extracted data from included trials  
27 using standardized and piloted screening and data extraction forms. Citation screening,  
28 study selection and data extraction were performed in duplicate. We assessed the internal  
29 validity of included trials using the Cochrane Collaboration Risk of Bias tool<sup>13</sup>.  
30  
31 Discrepancies between the two reviewers were resolved by consensus or by a third  
32 reviewer (RZ), as required. Data extraction and descriptive statistics were performed  
33 using Microsoft Excel 2016 (Excel version 15, Microsoft Corp).  
34  
35  
36  
37  
38  
39  
40  
41  
42  
43

### 44 **Data Analysis**

45  
46 Data analysis was performed using Review Manager (RevMan v5.3.5, The Nordic  
47 Cochrane Center, The Cochrane Collaboration, Copenhagen, Denmark). Study level  
48 comparisons of dichotomous data were presented as risk ratios (RR) with 95%  
49 confidence intervals (CI). Pooled continuous data were expressed as the mean difference  
50  
51  
52  
53  
54  
55  
56  
57  
58  
59  
60

1  
2  
3 (MD), or standardized mean difference (SMD). Change scores or post-treatment means  
4  
5 were extracted to inform summary estimates for continuous data. Pooled risk ratios and  
6  
7 95% confidence intervals were conducted using Mantel-Haenszel random-effects model.  
8  
9  
10 Pooled MDs or SMDs were calculated using a random-effects model. For the primary  
11  
12 outcome of fatigue, if multiple scales were reported, fatigue-specific scores were  
13  
14 preferred over general scores and the most commonly reported and clinically meaningful  
15  
16 score was used to generate summary effect measures. In studies evaluating exercise  
17  
18 capacity, weight-based VO<sub>2</sub> max values were utilized preferentially if both absolute and  
19  
20 weight-based VO<sub>2</sub> max results were provided. Statistical heterogeneity was quantified  
21  
22 using the I<sup>2</sup> statistic<sup>15</sup>. For the primary outcomes of fatigue and work capacity, we  
23  
24 evaluated potential publication bias using funnel plot analysis<sup>16</sup>. All tests of statistical  
25  
26 inference reflect a 2-sided  $\alpha$  of 0.05.  
27  
28  
29  
30  
31  
32

### 33 **Subgroup Analyses**

34  
35 We performed subgroup analyses for fatigue and exercise capacity outcomes  
36  
37 according to biologic sex, athletic status (athlete or non-athlete), method of iron  
38  
39 administration, duration of therapy, duration of study follow up, and risk of bias.  
40  
41  
42  
43

### 44 **Grading the Evidence**

45  
46 We graded the strength of evidence for our primary outcomes using the GRADE  
47  
48 methodology. This approach classifies the strength of evidence as “*high*”, “*moderate*”,  
49  
50 “*low*” or “*very low*.”  
51  
52  
53  
54  
55  
56  
57  
58  
59  
60

## RESULTS

### Trial Characteristics & Study Populations

Of the 11,580 citations identified, we included 18 unique trials and two companion papers<sup>17,18</sup>, enrolling 1162 subjects (**Figure 1; Table 1**). Trials were published between 1989 and 2015, and all trials were published in peer-reviewed journals. Eight trials<sup>19-26</sup> were from North America, seven trials<sup>27-33</sup> were from Europe, two trials<sup>18,34</sup> were from Australia, and one trial<sup>35</sup> was from Asia.

Exclusively healthy females (aged 17 to 55 years old) with varying levels of fitness (sedentary to well-trained) were enrolled in all but three studies<sup>22,27,29</sup>. The WHO cutoff for anemia [hemoglobin concentration  $\geq 130$  g/L (males) and  $\geq 120$  g/L (females)] was used by 9 studies<sup>19,22-25,30-32,35</sup>, whereas 7 studies used lower values ranging from  $\geq 110$  to  $< 120$  g/L<sup>20,21,27,28,33,34,36</sup>, and baseline hemoglobin concentration was not provided in 2 trial reports<sup>26,29</sup>.

All trials were placebo-controlled. In 13 of 18 trials (72%), we considered the blinding of participants and personnel to be adequate. Likewise, 10 trials (55%) adequately incorporated blinded outcome assessment. One trial<sup>29</sup> was considered to have a low risk of bias (**Table 2**). The remainder of the trials were considered unclear risk of bias, due to unclear processes of randomization (12 trials<sup>19-27,30,33,34</sup>) or allocation concealment (13 trials<sup>19-27,30,31,34,35</sup>).

### Interventions

Iron interventions consisted of iron supplementation administered orally, intramuscularly or intravenously. Of the trials evaluating oral supplements, all but one<sup>29</sup>

1  
2  
3 used ferrous sulfate (13 trials<sup>19-26,30,32,33,35,36</sup>, 721 participants). Intravenous iron was  
4  
5 administered in three trials<sup>27,28,31</sup> (395 participants), and intramuscular iron in one trial<sup>34</sup>  
6  
7 (16 participants). In trials using oral iron<sup>19-26,29,30,32,33,35,36</sup>, the mean daily elemental iron  
8  
9 dose was 86.9mg ( $\pm$  49.1mg; range: 16 to 200mg). In trials reporting intravenous  
10  
11 iron<sup>27,28,31</sup>, the mean daily elemental iron dose was 566mg ( $\pm$  330mg; range 200 to  
12  
13 1000mg) and mean total elemental iron dose 767mg ( $\pm$  206mg; range 500 to 1000mg).  
14  
15 Among all studies, the mean duration of iron therapy was 46 days ( $\pm$  30 days; range 1 to  
16  
17 112 days), and mean duration of follow-up was 57 days ( $\pm$  24 days; range 28 to 112  
18  
19 days).  
20  
21  
22  
23  
24  
25

## 26 **Primary Outcomes**

### 27 *Fatigue*

28  
29  
30 Four trials<sup>28,31-33</sup> enrolling 714 participants were eligible for meta-analysis. Iron  
31  
32 supplementation was associated with a reduction in subjective measures of fatigue when  
33  
34 assessed by either the Piper Fatigue Scale (PFS),<sup>28</sup> the Current and Past Psychological  
35  
36 State scale (CAPPS),<sup>32</sup> visual analog scale<sup>33</sup> or Brief Fatigue Inventory questionnaire  
37  
38 (BFI)<sup>31</sup> (SMD -0.38; 95% CI -0.52 to -0.23; I<sup>2</sup> 0%) (**Figure 2**). In one trial using the BFI  
39  
40 score, fatigue was not significantly different between groups after 12 weeks, although it  
41  
42 was improved in the subgroup of participants with the lowest iron stores (ferritin  $\leq$  15  
43  
44 ng/ml or transferrin saturation  $\leq$  20%)<sup>31</sup>. Evaluation of publication bias was not possible  
45  
46 due to the low number of included trials. Given that the majority of trials were of unclear  
47  
48 risk of bias, we graded the overall strength of evidence as moderate.  
49  
50  
51  
52  
53  
54  
55  
56  
57  
58  
59  
60

### *Work Capacity*

Work capacity was reported in 10 trials<sup>19,20,22-27,30,34</sup> (291 participants); all but one<sup>20</sup> of the trials employed at least one of three common aerobic tests of work capacity: time trial<sup>19,25</sup>, time to exhaustion<sup>23,26,27,34</sup>, or VO<sub>2</sub> max<sup>19,22-27,30,34</sup> performance from a graded exercise test. In two trials (79 participants) that used 15 km time trials<sup>19,25</sup>, iron supplementation was not associated with improved exercise capacity (SMD -0.09; 95% CI -0.53 to 0.35; I<sup>2</sup> 0%) (**Appendix 4A**). In four trials<sup>23,26,27,34</sup> (69 participants) that used time-to-exhaustion tests, iron supplementation did not significantly improve exercise capacity (SMD 0.25; 95% CI -0.22 to 0.73; I<sup>2</sup> 0%) (**Appendix 4B**). Nine trials<sup>19,22-27,30,34</sup> (235 participants) reported VO<sub>2</sub> max as a surrogate measure of work capacity. Iron supplementation did not increase VO<sub>2</sub> max (SMD 0.11; 95% CI -0.15 to 0.37; I<sup>2</sup> 0%) (**Appendix 4C**). We found no evidence of funnel plot asymmetry to suggest publication bias for this outcome (**Appendix 5**). The overall strength of the evidence for time trial, time to exhaustion and VO<sub>2</sub> max outcomes were low, given the imprecision of effect estimates and that the majority of trials were of unclear risk of bias.

One trial<sup>20</sup> (20 participants) used dynamic knee extension exercise to evaluate changes in work capacity. In this trial, the decline in maximum voluntary contraction after 6 minutes of exercise was significantly less in participants randomized to receive iron. Among 16 other unique measures of work capacity, 19% (3 of 16) found statistically significant increases in measures of work capacity with iron supplementation (**Appendix 6**).

### *Subgroup analysis*

1  
2  
3 Subgroup analyses based on method of iron administration and duration of  
4 follow-up demonstrated no statistically significant differences in subjective fatigue.  
5  
6  
7 Biologic sex, athletic status (athlete vs. non-athlete) and risk of bias could not be  
8  
9  
10 evaluated as all trials contributing data to the meta-analyses enrolled females of  
11  
12 uncharacterized athletic status, and were of unclear risk of bias<sup>28,31-33</sup>. Subgroup analyses  
13  
14 evaluating athletic status and method of iron administration demonstrated no statistically  
15  
16 significant differences in objective work capacity. Biologic sex, duration of follow-up  
17  
18 and risk of bias were unevaluable as all trials enrolled females with follow-up of less than  
19  
20 2 months, and all were of unclear risk of bias<sup>19,22-27,30,34</sup> (**Appendix 7 and 8**).

## 25 26 **Secondary Outcomes and Adverse Events**

27  
28 Despite the absence of baseline anemia, iron supplementation significantly  
29  
30 increased serum hemoglobin concentration (MD 3.91 g/L; 95% CI 1.64 to 6.18;  $I^2 =$   
31  
32 44%; 13 trials; 496 participants)<sup>18-27,30,32,34</sup>. In two trials<sup>25,28</sup> reporting incident anemia, a  
33  
34 new diagnosis of anemia at trial completion was less common in patients randomized to  
35  
36 receive iron supplementation. Iron supplementation also significantly increased serum  
37  
38 ferritin (MD 9.23  $\mu\text{mol/L}$ ; 95% CI 6.48 to 11.97;  $I^2$  58%; 14 trials; 616 participants).

39  
40  
41 Adverse events were sparsely reported. Gastrointestinal intolerance was reported  
42  
43 in three trials<sup>23,29,32</sup>, and was significantly increased in one trial<sup>29</sup> using intramuscular iron  
44  
45 administration, but not in the two trials<sup>23,32</sup> that used oral administration. Nausea was  
46  
47 reported in four trials<sup>18,28,31,33</sup>; two trials<sup>28,31</sup> using intravenous administration of iron  
48  
49 reported significantly increased nausea, whereas nausea was not increased in patients  
50  
51 who received iron by oral administration<sup>18,33</sup>. Constipation was reported in one trial<sup>18</sup>, and  
52  
53  
54  
55  
56  
57  
58  
59  
60

1  
2  
3 diarrhea in two trials<sup>18,31</sup> (**Appendix 9**). Adherence with the study intervention was  
4 reported in 13 trials<sup>18,19,22-29,32,33,35</sup>. Iron supplementation was not associated with  
5 differential rates of medication adherence (RR 1.0; CI 95% 0.99 to 1.01; I<sup>2</sup> 0%; 12 trials;  
6 958 participants). The route of administration of the study intervention was also not  
7 associated with differences in adherence (**Appendix 10**).  
8  
9  
10  
11  
12  
13  
14  
15  
16

## 17 **DISCUSSION**

18  
19  
20 In iron deficient but non-anemic adults, we found iron supplementation was  
21 associated with reduced subjective measures of fatigue but had no significant impact on  
22 objective work capacity. Given iron deficiency is the most prevalent micronutrient  
23 deficiency worldwide<sup>2</sup>, there is a discrepant lack of robust evidence evaluating iron  
24 supplementation in the absence of anemia across important patient populations. Despite  
25 rigorous and systematic methodology, we were only able to identify 18 trials enrolling  
26 1162 adults, representing a minute fraction of affected individuals.  
27  
28  
29  
30  
31  
32  
33  
34  
35

36 While treatment of iron deficiency in the absence of anemia is associated with  
37 reduced subjective fatigue, whether this translates to clinically meaningful outcomes,  
38 including quality of life, work absenteeism, job or athletic performance is uncertain.  
39  
40  
41  
42  
43  
44  
45  
46  
47  
48  
49  
50  
51  
52  
53  
54  
55  
56  
57  
58  
59  
60

Our systemic review builds on the results of two published evidence syntheses  
evaluating iron supplementation<sup>37,38</sup>. In a systematic review of healthy menstruating

1  
2  
3 women, iron supplementation, irrespective of iron status or anemia, improved  
4  
5 hemoglobin and measures of iron stores<sup>37</sup>. A second systematic review that included  
6  
7 studies of pregnant women, blood donors and children, and included data from both  
8  
9 randomized and non-randomized trials concluded benefit of iron supplementation<sup>38</sup>.  
10  
11 Despite the high prevalence of iron deficiency, significant heterogeneity in patient  
12  
13 populations and study designs, and absence of data pertaining to objective muscle  
14  
15 performance limits the generalizability of these findings.  
16  
17  
18

19 In trials where a proportion of participants were anemic at enrollment, and with  
20  
21 the knowledge that anemia results in decreased physical work capacity, iron  
22  
23 supplementation has previously been associated with improved maximal and submaximal  
24  
25 exercise performance<sup>5-8</sup>. We found insufficient evidence to suggest that iron  
26  
27 supplementation improves exercise capacity in iron-depleted non-anemic adults, differing  
28  
29 from the results of physiologic experiments that describe VO<sub>2</sub> max improvements with  
30  
31 iron supplementation, independent of hemoglobin<sup>39</sup>. These findings were postulated to  
32  
33 be secondary to iron-mediated improvements in muscle oxidative capacity and improved  
34  
35 mitochondrial function, the validity of which is unclear<sup>39</sup>.  
36  
37  
38  
39

40 A potential weakness our systematic review is the difficulty masking oral iron due  
41  
42 to predictable gastrointestinal side effects and changes in stool color, and the impact of  
43  
44 imperfect blinding on subjective measures of fatigue. However, despite this, fatigue was  
45  
46 consistently reduced in trials evaluating both oral (n = 2) and intravenous (n = 2) iron  
47  
48 preparations. Healthy females comprised the study population in 15 of 18 included trials;  
49  
50 subjective measures of fatigue may not consistently apply to other at-risk populations.  
51  
52 The duration of follow was relatively short (57 days; range 28-112) and perhaps too brief  
53  
54  
55  
56  
57  
58  
59  
60



1  
2  
3 to expect significant changes in muscle metabolism or function. Finally, the lack of  
4  
5 systematic reporting of adverse events impairs our ability to draw conclusions regarding  
6  
7 the incidence of these events and tolerability of iron therapy.  
8  
9

10 The strengths of this review include the comprehensiveness of the search strategy,  
11  
12 which included electronic databases, trial registries, and forward searches. We used an *a*  
13  
14 *priori* published protocol and followed established methodological guidelines concerning  
15  
16 the conduct and reporting of this review. We synthesized patient-centered outcomes and  
17  
18 evaluated efficacy in the context of relevant safety outcomes and adverse events. In  
19  
20 contrast to the systematic review of *Low et al*, we excluded studies that enrolled patients  
21  
22 with anemia at baseline<sup>37</sup>. While cut-offs for anemia varied slightly among included  
23  
24 trials, this important inclusion criteria reduces (but may not eliminate) the probability that  
25  
26 changes in fatigue or muscle function are due to correction of anemia or independent of  
27  
28 oxygen carrying capacity reflecting increased red cell mass. While the duration of follow  
29  
30 up in most studies was modest, the mean daily elemental iron dose ( $86.9 \pm 49.1$  mg)  
31  
32 reflects a recommended 'treatment' for patients with iron deficiency anemia<sup>40</sup>.  
33  
34  
35  
36  
37

38 In iron deficient non-anemic adults, iron supplementation is associated with  
39  
40 reduced subjective measures of fatigue, but not with objective improvements in work  
41  
42 capacity. Given the global prevalence of both iron deficiency and fatigue, patients and  
43  
44 practitioners could consider a course of iron supplementation to improve symptoms of  
45  
46 fatigue in presence or absence of documented anemia.  
47  
48  
49  
50  
51  
52  
53  
54  
55  
56  
57  
58  
59  
60

1  
2  
3 *Contribution:*  
4

5 Two researchers (BH and DH) lead and coordinated all aspects of the review,  
6 including but not limited to preparation of the literature search, screening relevant  
7 material, data analysis and extraction, interpretation of the results of the meta-analytic  
8 procedures, bias investigation, and preparation of the final report; three second reviewers  
9 (JG, ER, BP) conducted independent screening of relevant material, extracted and  
10 analyzed data and aided in report preparation; one hematologist/ intensivist (RZ),  
11 methodologist (DAF), and anesthetist/intensivist (AFT) with expertise in systematic  
12 reviews provided content expertise and methodological input, and resolved disagreement  
13 among reviewers; one systematic review expert (AMAS) provided methodological input;  
14 two hematologists (DSH and ER), one gastroenterologist (CB) and one statistician (RR)  
15 provided content expertise. All authors were involved in the process of study design and  
16 manuscript review.  
17  
18  
19  
20  
21  
22  
23  
24  
25  
26  
27  
28  
29  
30  
31  
32  
33  
34

35 *Competing interests:* the authors declare no competing financial interests.  
36  
37  
38  
39

40 *Funding:* funding was not obtained for completion of this study.  
41  
42  
43

44 *Data sharing:* We are submitting (in our manuscript and supplementary files) all planned  
45 data analyses.  
46  
47  
48  
49  
50  
51  
52  
53  
54  
55  
56  
57  
58  
59  
60

## References:

1. Kassebaum NJ, Jasrasaria R, Naghavi M, et al. A systematic analysis of global anemia burden from 1990 to 2010. *Blood*. 2014;123(5):615-624.
2. McLean E, Cogswell M, Egli I, Wojdyla D, de Benoist B. Worldwide prevalence of anaemia, WHO Vitamin and Mineral Nutrition Information System, 1993-2005. *Public Health Nutr*. 2009;12(4):444-454.
3. Milman N. Anemia--still a major health problem in many parts of the world! *Ann Hematol*. 2011;90(4):369-377.
4. Assessing the iron status of populations: including literature reviews: report of a Joint World Health Organization / Centers for Disease Control and Prevention Technical Consultation on the Assessment of Iron Status on the Population Level. Geneva, Switzerland; 2004:108.
5. Dallman PR. Iron deficiency: does it matter? *J Intern Med*. 1989;226(5):367-372.
6. Eichner ER. Fatigue of anemia. *Nutr Rev*. 2001;59(1 Pt 2):S17-19.
7. Florencio CA. Effects of iron and ascorbic acid supplementation on hemoglobin level and work efficiency of anemic women. *J Occup Med*. 1981;23(10):699-704.
8. Haas JD, Brownlie T. Iron deficiency and reduced work capacity: a critical review of the research to determine a causal relationship. *J Nutr*. 2001;131(2S-2):676S-688S; discussion 688S-690S.
9. Lukaski HC. Vitamin and mineral status: effects on physical performance. *Nutrition*. 2004;20(7-8):632-644.
10. Lewis G, Wessely S. The epidemiology of fatigue: more questions than answers. *J Epidemiol Community Health*. 1992;46(2):92-97.
11. Jason LA, Evans M, Brown M, Porter N. What is fatigue? Pathological and nonpathological fatigue. *PM R*. 2010;2(5):327-331.
12. Hurrie D, Graham J, Rimmer E, et al. Efficacy of iron replacement therapy on fatigue and work capacity in non-anemic adults with iron depletion: a systematic review of randomized controlled trials. PROSPERO International prospective register of systematic reviews; 2014.
13. The Cochrane Collaboration. In: Higgins J, Green S eds. Cochrane Handbook for Systematic Reviews of Interventions; 2009.
14. Liberati A, Altman DG, Tetzlaff J, et al. The PRISMA statement for reporting systematic reviews and meta-analyses of studies that evaluate healthcare interventions: explanation and elaboration. *BMJ*. 2009;339:b2700.
15. Higgins JP, Thompson SG. Quantifying heterogeneity in a meta-analysis. *Stat Med*. 2002;21(11):1539-1558.
16. Sterne JA, Egger M, Smith GD. Systematic reviews in health care: Investigating and dealing with publication and other biases in meta-analysis. *BMJ*. 2001;323(7304):101-105.
17. Hinton PS, Giordano C, Brownlie T, Haas JD. Iron supplementation improves endurance after training in iron-depleted, nonanemic women. *Journal of Applied Physiology*. 2000;88(3):1103-1111.
18. Leonard AJ, Chalmers KA, Collins CE, Patterson AJ. Comparison of two doses of elemental iron in the treatment of latent iron deficiency: efficacy, side effects and blinding capabilities. *Nutrients*. 2014;6(4):1394-1405.

19. Brownlie T, Utermohlen V, Hinton PS, Giordano C, Haas JD. Marginal iron deficiency without anemia impairs aerobic adaptation among previously untrained women. *Am J Clin Nutr.* 2002;75(4):734-742.
20. Brutsaert TD, Hernandez-Cordero S, Rivera J, Viola T, Hughes G, Haas JD. Iron supplementation improves progressive fatigue resistance during dynamic knee extensor exercise in iron-depleted, nonanemic women. *Am J Clin Nutr.* 2003;77(2):441-448.
21. Donangelo CM, Woodhouse LR, King SM, Viteri FE, King JC. Supplemental zinc lowers measures of iron status in young women with low iron reserves. *J Nutr.* 2002;132(7):1860-1864.
22. Hinton PS, Sinclair LM. Iron supplementation maintains ventilatory threshold and improves energetic efficiency in iron-deficient nonanemic athletes. *Eur J Clin Nutr.* 2007;61(1):30-39.
23. Klingshirn LA, Pate RR, Bourque SP, Davis JM, Sargent RG. Effect of iron supplementation on endurance capacity in iron-depleted female runners. *Med Sci Sports Exerc.* 1992;24(7):819-824.
24. Newhouse IJ, Clement DB, Taunton JE, McKenzie DC. The effects of prelatent/latent iron deficiency on physical work capacity. *Med Sci Sports Exerc.* 1989;21(3):263-268.
25. Zhu YI, Haas JD. Altered metabolic response of iron-depleted nonanemic women during a 15-km time trial. *J Appl Physiol (1985).* 1998;84(5):1768-1775.
26. LaManca JJ, Haymes EM. Effects of iron repletion on VO<sub>2</sub>max, endurance, and blood lactate in women. *Med Sci Sports Exerc.* 1993;25(12):1386-1392.
27. Burden RJ, Pollock N, Whyte GP, et al. Effect of Intravenous Iron on Aerobic Capacity and Iron Metabolism in Elite Athletes. *Med Sci Sports Exerc.* 2015;47(7):1399-1407.
28. Favrat B, Balck K, Breymann C, et al. Evaluation of a Single Dose of Ferric Carboxymaltose in Fatigued, Iron-Deficient Women - PREFER a Randomized, Placebo-Controlled Study. *PLoS One.* 2014;9(4).
29. Flink H, Tegelberg A, Thorn M, Lagerlof F. Effect of oral iron supplementation on unstimulated salivary flow rate: a randomized, double-blind, placebo-controlled trial. *J Oral Pathol Med.* 2006;35(9):540-547.
30. Fogelholm M, Jaakkola L, Lampisjärvi T. Effects of iron supplementation in female athletes with low serum ferritin concentration. *Int J Sports Med.* 1992;13(2):158-162.
31. Krayenbuehl PA, Battegay E, Breymann C, Furrer J, Schulthess G. Intravenous iron for the treatment of fatigue in nonanemic, premenopausal women with low serum ferritin concentration. *Blood.* 2011;118(12):3222-3227.
32. Vaucher P, Druais PL, Waldvogel S, Favrat B. Effect of iron supplementation on fatigue in nonanemic menstruating women with low ferritin: a randomized controlled trial. *CMAJ.* 2012;184(11):1247-1254.
33. Verdon F, Burnand B, Stubi CL, et al. Iron supplementation for unexplained fatigue in non-anaemic women: double blind randomised placebo controlled trial. *BMJ.* 2003;326(7399):1124.
34. Peeling P, Blee T, Goodman C, et al. Effect of iron injections on aerobic-exercise performance of iron-depleted female athletes. *Int J Sport Nutr Exerc Metab.* 2007;17(3):221-231.

- 1  
2  
3 35. Moafi A, Rahgozar S, Hanian M, et al. The effects of supplemental iron on  
4 educational achievements of students with "Iron deficiency without Anemia": A  
5 randomized, double-blind, placebo-controlled trial. *HealthMED*. 2012;6(6):2047-2051.  
6 36. Leonard AJ, Chalmers KA, Collins CE, Patterson AJ. A study of the effects of  
7 latent iron deficiency on measures of cognition: a pilot randomised controlled trial of iron  
8 supplementation in young women. *Nutrients*. 2014;6(6):2419-2435.  
9 37. Low MS, Speedy J, Styles CE, De-Regil LM, Pasricha SR. Daily iron  
10 supplementation for improving anaemia, iron status and health in menstruating women.  
11 *Cochrane Database Syst Rev*. 2016;4:CD009747.  
12 38. Pratt JJ, Khan KS. Non-anaemic iron deficiency - a disease looking for  
13 recognition of diagnosis: a systematic review. *Eur J Haematol*. 2016;96(6):618-628.  
14 39. Friedmann B, Weller E, Mairbaurl H, Bartsch P. Effects of iron repletion on blood  
15 volume and performance capacity in young athletes. *Medicine and Science in Sports and*  
16 *Exercise*. 2001;33(5):741-746.  
17 40. Camaschella C. Iron-deficiency anemia. *N Engl J Med*. 2015;372(19):1832-1843.  
18  
19  
20  
21  
22  
23  
24  
25  
26  
27  
28  
29  
30  
31  
32  
33  
34  
35  
36  
37  
38  
39  
40  
41  
42  
43  
44  
45  
46  
47  
48  
49  
50  
51  
52  
53  
54  
55  
56  
57  
58  
59  
60

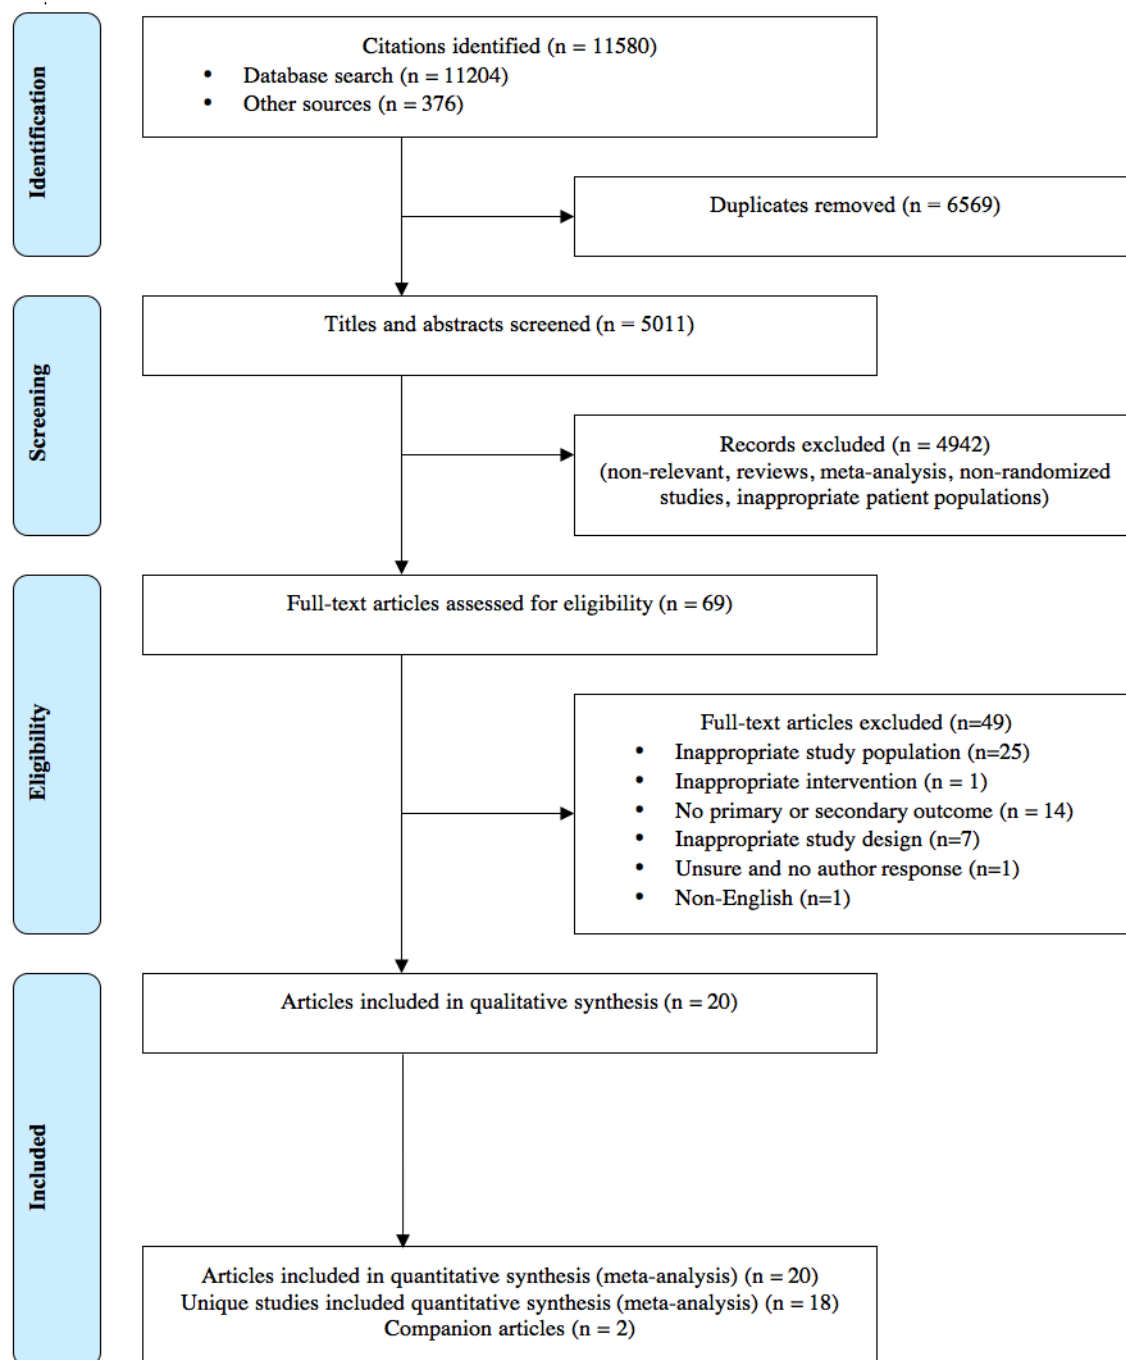

47 **Figure 1.** Study flow diagram following the Preferred Reporting Items of Systematic Reviews  
48 and Meta-Analyses (PRISMA)<sup>14</sup> with modifications.  
49

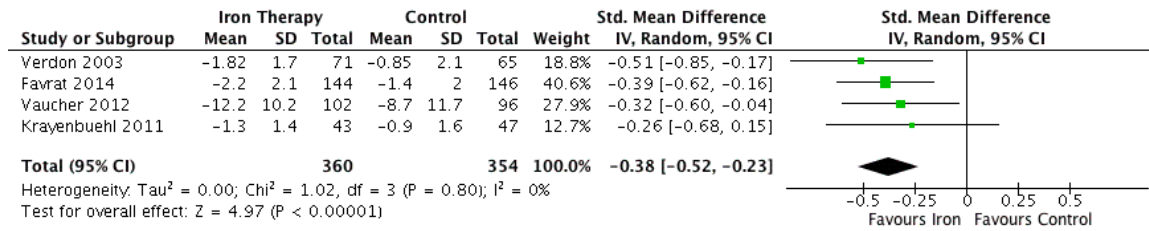

**Figure 2. Validated fatigue scores**

For peer review only

**Table 1. Characteristics of individual trials, patient populations and interventions**

| Source                           | Population                                      | No. of patients (iron) | No. of patients (control) | Control        | Age (range) | Min Hb (g/L)     | Max ferritin (ug/L) | Iron type             | Daily iron dose (mg) | Iron route | Iron duration (days) | Follow-up (days) |
|----------------------------------|-------------------------------------------------|------------------------|---------------------------|----------------|-------------|------------------|---------------------|-----------------------|----------------------|------------|----------------------|------------------|
| <b>Brownlie</b> <sup>17,19</sup> | Physically active untrained women               | 22                     | 19                        | Placebo        | 18-33       | 120              | 16                  | Ferrous sulfate       | 16                   | PO         | 42                   | 42               |
| <b>Brutsaert</b> <sup>20</sup>   | Untrained women                                 | 10                     | 10                        | Placebo        | 18-45       | 110              | 20                  | Ferrous sulfate       | 18.1                 | PO         | 42                   | 42               |
| <b>Burden</b> <sup>27</sup>      | University endurance runners                    | 7                      | 8                         | Saline         |             | 120              | 30 (F); 40 (M)      | Ferric carboxymaltose | 500                  | IV         | 1                    | 28               |
| <b>Donangelo</b> <sup>21</sup>   | Young women                                     | 12                     | 11                        | Zinc gluconate | 20-28       | 110              | 20                  | Ferrous sulfate       | 100                  | PO         | 56                   | 70               |
| <b>Favrat</b> <sup>28</sup>      | Premenopausal women with fatigue                | 144                    | 146                       | Saline         |             | 115              | 15                  | Ferric carboxymaltose | 1000                 | IV         | 1                    | 56               |
| <b>Flink</b> <sup>29</sup>       | Individuals with low unstimulated salivary flow | 25                     | 21                        | Placebo        | 15-46       |                  | 30 (F); 50 (M)      | Ferrous fumarate      | 120                  | PO         | 90                   | 90               |
| <b>Fogelholm</b> <sup>30</sup>   | Female athletes                                 | 17                     | 14                        | Placebo        | 17-31       | 120              | 25                  | Ferrous sulfate       | 100                  | PO         | 56                   | 56               |
| <b>Hinton</b> <sup>22</sup>      | Recreationally trained individuals              | 9                      | 8                         | Placebo        | 18-41       | 120 (F); 130 (M) | 16                  | Ferrous sulfate       | 30                   | PO         | 42                   | 42               |
| <b>Klingshirn</b> <sup>23</sup>  | Female endurance runners                        | 9                      | 9                         | Placebo        | 22-39       | 120              | 20                  | Ferrous sulfate       | 100                  | PO         | 56                   | 56               |
| <b>Krayenbueh</b> <sup>31</sup>  | Premenopausal women with fatigue                | 43                     | 47                        | Saline         |             | 120              | 50                  | Venofer               | 200                  | IV         | 4                    | 84               |
| <b>LaManca</b> <sup>26</sup>     | Healthy females                                 | 28                     | 28                        | Placebo        |             |                  | 20                  | Ferrous sulfate       | 100                  | PO         | 56                   | 56               |
| <b>Leonard</b> <sup>18,36*</sup> | Young women                                     | 16*                    | 8                         | Placebo        | 18-35       | 115              | 20                  | Ferrous sulfate       | 60/80                | PO         | 112                  | 112              |
| <b>Moafi</b> <sup>35</sup>       | Female students                                 | 36                     | 36                        | Placebo        | 18-35       | 120              | 20                  | Ferrous sulfate       | 50                   | PO         | 42                   | 42               |
| <b>Newhouse</b> <sup>24</sup>    | Young women                                     | 19                     | 21                        | Placebo        | 18-40       | 120              | 20                  | Ferrous sulfate       | 200                  | PO         | 56                   | 56               |
| <b>Peeling</b> <sup>34</sup>     | Well-trained female athletes                    | 8                      | 8                         | Saline         |             | 115              | 35                  | Ferrum H              | 100                  | IM         | 5                    | 28               |
| <b>Vaucher</b> <sup>32</sup>     | Women with fatigue from clinic                  | 102                    | 96                        | Placebo        | 18-50       | 120              | 50                  | Ferrous sulfate       | 80                   | PO         | 84                   | 84               |
| <b>Verdon</b> <sup>33</sup>      | Women with fatigue from clinic                  | 75                     | 69                        | Placebo        | 18-55       | 117              |                     | Ferrous sulfate       | 80                   | PO         | 28                   | 28               |
| <b>Zhu</b> <sup>25</sup>         | Physically active women                         | 20                     | 17                        | Placebo        | 19-36       | 120              | 16                  | Ferrous sulfate       | 135.3                | PO         | 56                   | 56               |

\*Two intervention arms - weighted averaged between two iron treatment groups; Max = maximum; Min = minimum; Hb = hemoglobin; F = females; M = males; PO = oral; IM = intramuscular; IV = intravenous



**Table 2. Cochrane Risk of Bias Summary.** Green = low risk of bias; Yellow = unclear risk of bias

|                           | OVERALL | Random sequence generation | Allocation concealment | Blinding of participants and personnel | Blinding of outcome assessment | Incomplete outcome data | Selective reporting | Other |
|---------------------------|---------|----------------------------|------------------------|----------------------------------------|--------------------------------|-------------------------|---------------------|-------|
| Brownlie <sup>17,19</sup> | Yellow  | Yellow                     | Yellow                 | Green                                  | Green                          | Yellow                  | Green               | Green |
| Brutsaert <sup>20</sup>   | Yellow  | Yellow                     | Yellow                 | Green                                  | Green                          | Yellow                  | Green               | Green |
| Burden <sup>27</sup>      | Yellow  | Yellow                     | Yellow                 | Green                                  | Green                          | Yellow                  | Green               | Green |
| Donangelo <sup>21</sup>   | Yellow  | Yellow                     | Yellow                 | Green                                  | Green                          | Yellow                  | Green               | Green |
| Favrat <sup>28</sup>      | Yellow  | Yellow                     | Yellow                 | Green                                  | Green                          | Yellow                  | Green               | Green |
| Flink <sup>29</sup>       | Yellow  | Yellow                     | Yellow                 | Green                                  | Green                          | Yellow                  | Green               | Green |
| Fogelholm <sup>30</sup>   | Yellow  | Yellow                     | Yellow                 | Green                                  | Green                          | Yellow                  | Green               | Green |
| Hinton <sup>22</sup>      | Yellow  | Yellow                     | Yellow                 | Green                                  | Green                          | Yellow                  | Green               | Green |
| Klingshirn <sup>23</sup>  | Yellow  | Yellow                     | Yellow                 | Green                                  | Green                          | Yellow                  | Green               | Green |
| Krayenbueh <sup>31</sup>  | Yellow  | Yellow                     | Yellow                 | Green                                  | Green                          | Yellow                  | Yellow              | Green |
| LaManca <sup>26</sup>     | Yellow  | Yellow                     | Yellow                 | Green                                  | Green                          | Yellow                  | Green               | Green |
| Leonard <sup>18,36</sup>  | Yellow  | Yellow                     | Yellow                 | Green                                  | Green                          | Yellow                  | Green               | Green |
| Moafi <sup>35</sup>       | Yellow  | Yellow                     | Yellow                 | Green                                  | Green                          | Yellow                  | Green               | Green |
| Newhouse <sup>24</sup>    | Yellow  | Yellow                     | Yellow                 | Green                                  | Green                          | Yellow                  | Green               | Green |
| Peeling <sup>34</sup>     | Yellow  | Yellow                     | Yellow                 | Green                                  | Green                          | Yellow                  | Green               | Green |
| Vaucher <sup>32</sup>     | Yellow  | Yellow                     | Yellow                 | Green                                  | Green                          | Yellow                  | Green               | Green |
| Verdon <sup>33</sup>      | Yellow  | Yellow                     | Yellow                 | Green                                  | Green                          | Yellow                  | Green               | Green |
| Zhu <sup>25</sup>         | Yellow  | Yellow                     | Yellow                 | Green                                  | Green                          | Yellow                  | Green               | Green |

review only

## Appendix 1. Inclusion Criteria

1. Non-anemic ( $\geq 80\%$ ): Indicated by study cutoff values, or hemoglobin concentration [Hb]  $\geq 130$  g/L (males),  $\geq 120$  g/L (females);
2. Adults ( $\geq 18$  yrs); ( $\geq 80\%$ )
3. Iron Depleted ( $\geq 80\%$ ): According to study specific definition
4. Iron therapy administered as oral / intramuscular / intravenous therapy, all therapy durations, doses and frequencies of administration will be included
5. Studies where outcomes are assessed 1 or more months from the initiation of oral iron therapy
6. Only prospective randomized trials will be considered.

## Appendix 2. Exclusion Criteria

1. Studies involving animals;
2. Females who were pregnant or breastfeeding;
3. Individuals with fatigue ( $\geq 20\%$ ) identified as being the result of some other pathology (i.e. psychiatric diagnosis, thyroid, liver, rheumatic, renal, cardiovascular, pulmonary, or oncologic cause)
4. Studies involving surgical patients
5. Studies involving author identified blood donors or phlebotomy
6. Studies assessing the pharmacokinetic properties of iron compounds in healthy volunteers where the short term outcomes are expressed as the objective (<1 month)
7. Non-English studies
8. Observational study designs, quasi-randomized, cross-over, or cluster randomized trials will not be considered for this review.
9. Studies where no relevant primary or secondary outcomes of interest are reported
10. Dietary fortification studies

### Appendix 3. Search Strategy

#### *Ovid Multifile (MEDLINE & Embase)*

Database: Embase <1974 to 2015 Week 47>, Ovid MEDLINE(R) In-Process & Other Non-Indexed Citations and Ovid MEDLINE(R) <1946 to Present>

Search Strategy:

-----

- 1 Iron/df (4519)
- 2 exp Ferritins/df (87)
- 3 exp Ferrous Compounds/df (1)
- 4 ((decreased or deficien\* or deplet\* or inadequa\* or insufficien\* or low or marginal) adj3 (iron or ferritin\*).tw,kw. (55943)
- 5 or/1-4 (57094)
- 6 Anemia/pc [Prevention & Control] (3144)
- 7 Anemia, Iron-Deficiency/pc [Prevention & Control] (2061)
- 8 (prevent\* adj3 (anemi\* or anaemi\* or iron deficien\*).tw,kw. (2915)
- 9 Deficiency Diseases/dt (968)
- 10 Iron/ad, tu (8860)
- 11 exp Ferritins/ad, tu (185)
- 12 exp Ferrous Compounds/ad, tu (2094)
- 13 ((ferric or ferritin\* or ferrous or iron) adj3 (administer\* or administration\* or dietary or replac\* or supplement\* or therap\* or treatment\*).tw,kw. (33100)
- 14 (iron adj3 (capsule\* or infusion\* or injection\* or intravenous\* or IV or parenteral\* or pill or pills or medication\* or tablet\*).tw,kw. (10147)
- 15 Iron/ and Dietary Supplements/ (4252)
- 16 (ferrous sulfate or ferrous sulphate or aktiferrin or apo-ferrous sulfate or auryxia or bifera or biofer or ceferro or conferon or eisendragees-ratiopharm or eisensulfat stada or elite iron or femiron or feosol or feospan or fer-gen-sol or fer-in-sol or feratab or fergon or ferodan or fero-gradumet or ferro-gradumet or ferogradumet or ferrex 150 or ferrogamma or ferrograd or haemoprotect or hemobion or hemofer or hamatopan or haematopan or kendural or "Mol-Iron" or plastufer or "Slow-Fe" or vitaferro kapseln).tw,kw. (4979)
- 17 (ferrous fumarate or feostat or ferrocop or fersaday or fersamal or ferval or fumar or galfer or ircon or nephro-fer or palafer or rulofer).tw,kw. (510)
- 18 (ferrous gluconate or apo-ferrous gluconate or dextriferron or eisen-sandoz or "FeG Iron" or ferroglucon or ferrogluconaat or ferrum verla or loesferron or losferron or simron or vitaferro brause).tw,kw. (226)
- 19 or/6-18 (55320)
- 20 5 and 19 (17537)
- 21 (controlled clinical trial or randomized controlled trial).pt. (504747)
- 22 clinical trials as topic.sh. (180086)
- 23 (randomi#ed or randomly or RCT\$1 or placebo\*).tw. (1644668)
- 24 ((singl\* or doubl\* or trebl\* or tripl\*) adj (mask\* or blind\* or dumm\*).tw. (324774)
- 25 trial.ti. (344352)
- 26 or/21-25 (2079234)
- 27 20 and 26 (2880)
- 28 exp Animals/ not (exp Animals/ and Humans/) (9776432)
- 29 27 not 28 (2641)
- 30 (comment or editorial or interview or news).pt. (1640361)
- 31 (letter not (letter and randomized controlled trial)).pt. (1871051)
- 32 29 not (30 or 31) (2636)
- 33 32 use prmz (1373)

- 1  
2  
3 34 iron deficiency/ (11754)  
4 35 iron deficiency anemia/ (28987)  
5 36 ((decreased or deficien\* or deplet\* or inadepu\* or insufficien\* or low or marginal) adj3  
6 (iron or ferritin\*).tw,kw. (55943)  
7 37 or/34-36 (71135)  
8 38 anemia/pc [Prevention] (3144)  
9 39 iron deficiency anemia/pc [Prevention] (2269)  
10 40 (prevent\* adj3 (anemi\* or anaemi\* or iron deficien\*).tw,kw. (2915)  
11 41 iron deficiency/dt [Drug Therapy] (1631)  
12 42 iron therapy/ (5814)  
13 43 iron/ad, dt, th [Drug Administration, Drug Therapy, Therapy] (13258)  
14 44 ferritin/ad, dt [Drug Administration, Drug Therapy] (211)  
15 45 ferrous ion/ad, dt [Drug Administration, Drug Therapy] (413)  
16 46 ((ferric or ferritin\* or ferrous or iron) adj3 (administer\* or administration\* or dietary or  
17 replac\* or supplement\* or therap\* or treatment\*).tw,kw. (33100)  
18 47 (iron adj3 (capsule\* or infusion\* or injection\* or intravenous\* or IV or parenteral\* or pill or  
19 pills or medication\* or tablet\*).tw,kw. (10147)  
20 48 iron/ and diet supplementation/ (3538)  
21 49 ferrous sulfate/ (6637)  
22 50 (ferrous sulfate or ferrous sulphate or aktiferrin or apo-ferrous sulfate or auryxia or bifera or  
23 biofer or ceferro or conferon or eisendragees-ratiopharm or eisensulfat stada or elite iron or  
24 femiron or feosol or feospan or fer-gen-sol or fer-in-sol or feratab or fergon or ferodan or fero-  
25 gradumet or ferro-gradumet or ferogradumet or ferrex 150 or ferrogamma or ferrogad or  
26 haemoprotect or hemobion or hemofer or hamatopan or haematopan or kendural or "Mol-Iron" or  
27 plastufer or "Slow-Fe" or vitaferro kapseln).tw,kw. (4979)  
28 51 ferrous fumarate/ (831)  
29 52 (ferrous fumarate or feostat or ferrocap or fersaday or fersamal or ferval or fumar or galfer  
30 or ircon or nephro-fer or palafer or rulofer).tw,kw. (510)  
31 53 ferrous gluconate/ (1490)  
32 54 (ferrous gluconate or apo-ferrous gluconate or dextriferron or eisen-sandoz or "FeG Iron" or  
33 ferroglucon or ferrogluconaat or ferrum verla or loesferron or losferron or simron or vitaferro  
34 brause).tw,kw. (226)  
35 55 or/38-54 (62415)  
36 56 37 and 55 (22461)  
37 57 randomized controlled trial/ or controlled clinical trial/ (1035658)  
38 58 exp "clinical trial (topic)"/ (172053)  
39 59 (randomi#ed or randomly or RCT\$1 or placebo\*).tw. (1644668)  
40 60 ((singl\* or doubl\* or trebl\* or tripl\*) adj (mask\* or blind\* or dumm\*).tw. (324774)  
41 61 trial.ti. (344352)  
42 62 or/57-61 (2260510)  
43 63 56 and 62 (3652)  
44 64 exp animal experimentation/ or exp models animal/ or exp animal experiment/ or  
45 nonhuman/ or exp vertebrate/ (40209729)  
46 65 exp humans/ or exp human experimentation/ or exp human experiment/ (31154163)  
47 66 64 not 65 (9057215)  
48 67 63 not 66 (3517)  
49 68 editorial.pt. (898431)  
50 69 letter.pt. not (letter.pt. and randomized controlled trial/) (1866594)  
51 70 67 not (68 or 69) (3492)  
52 71 70 use oemez (2075)  
53 72 33 or 71 (3448)  
54  
55  
56  
57  
58  
59  
60

- 1
  - 2
  - 3
  - 4
  - 5
  - 6
  - 7
  - 8
  - 9
  - 10
  - 11
  - 12
  - 13
  - 14
  - 15
  - 16
  - 17
  - 18
  - 19
  - 20
  - 21
  - 22
  - 23
  - 24
  - 25
  - 26
  - 27
  - 28
  - 29
  - 30
  - 31
  - 32
  - 33
  - 34
  - 35
  - 36
  - 37
  - 38
  - 39
  - 40
  - 41
  - 42
  - 43
  - 44
  - 45
  - 46
  - 47
  - 48
  - 49
  - 50
  - 51
  - 52
  - 53
  - 54
  - 55
  - 56
  - 57
  - 58
  - 59
  - 60
- 73 remove duplicates from 72 (2408) [TOTAL UNIQUE RECORDS]  
74 73 use prmz (1319) [MEDLINE UNIQUE RECORDS]  
75 73 use oemez (1089) [EMBASE UNIQUE RECORDS]

For peer review only

## Appendix 4. Measures of Work Capacity

### 4A. 15 km Time Trial

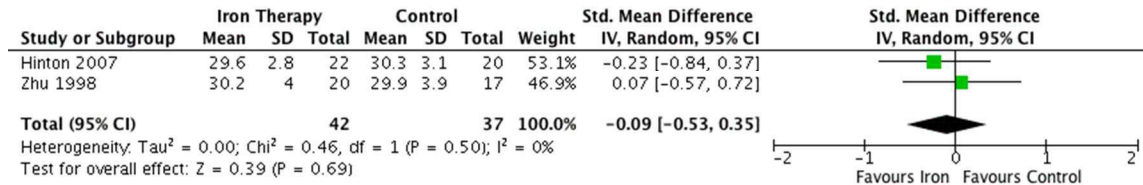

### 4B. Time to Exhaustion

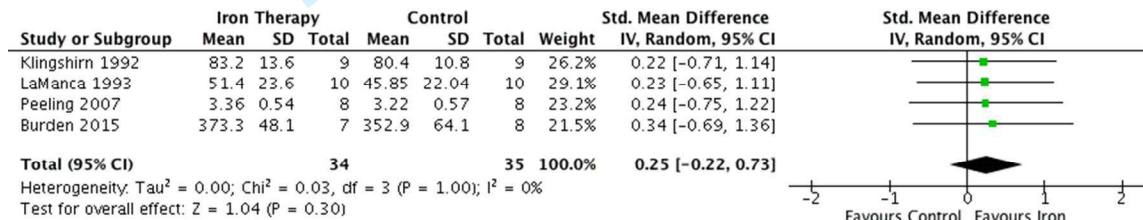

### 4C. Oxygen Consumption (VO<sub>2</sub> max)

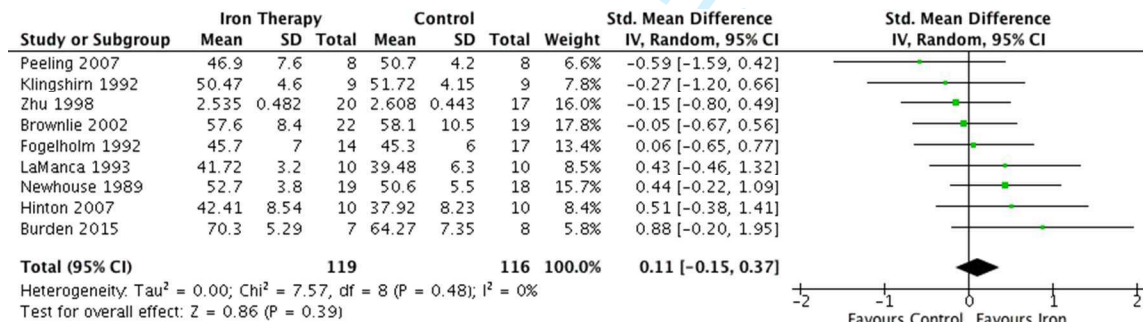

Appendix 5. Funnel Plot of Studies which captured VO<sub>2</sub> max

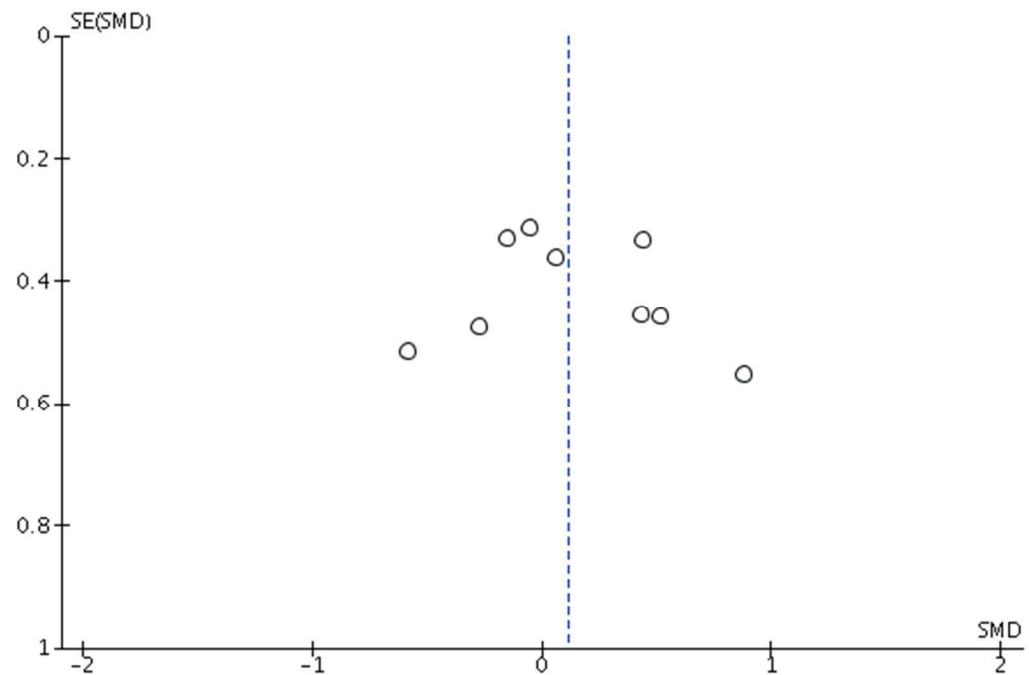

view only



## Appendix 6. Work capacity tests investigated among the trials reporting measures of work capacity

| Study                    | Population details                 | Work capacity tests                                                                                    | Intervention outcomes                                                                                                                                                                                                                                                     |
|--------------------------|------------------------------------|--------------------------------------------------------------------------------------------------------|---------------------------------------------------------------------------------------------------------------------------------------------------------------------------------------------------------------------------------------------------------------------------|
| Brownlie <sup>19</sup>   | Physically active untrained women  | VO <sub>2</sub> max<br>RER, HRmax<br>15km time trial<br>TT RER, TT<br>VO <sub>2</sub> max, TT lactates | Significant increases in VO <sub>2</sub> max and decreases in RER in iron treated group compared to placebo; no difference in HRmax<br>Significant reduction in TT in iron group compared to placebo; no differences between TT RER, TT %VO <sub>2</sub> max, TT lactates |
| Brutsaert <sup>20</sup>  | Untrained women                    | Dynamic knee extension to fatigue                                                                      | Significant reduction in MVC decline in iron group compared to placebo                                                                                                                                                                                                    |
| Burden <sup>27</sup>     | University endurance runners       | VO <sub>2</sub><br>Time to exhaustion<br>RPE                                                           | No significant difference in VO <sub>2</sub> max, time to exhaustion or RPE in iron group compared to placebo.                                                                                                                                                            |
| Fogelholm <sup>30</sup>  | Female athletes                    | VO <sub>2</sub> max<br>Lactate levels                                                                  | No significant difference in VO <sub>2</sub> max and lactate levels between iron and placebo group                                                                                                                                                                        |
| Hinton <sup>22</sup>     | Recreationally trained individuals | VO <sub>2</sub> max<br>Submaximal test<br>Ventilatory threshold                                        | Significant improvements in gross energetic efficiency and VT among iron groups compared to placebo; no significant difference in VO <sub>2</sub> max between groups                                                                                                      |
| Klingshirn <sup>23</sup> | Female endurance runners           | VO <sub>2</sub> max<br>Time to exhaustion<br>Lactate threshold                                         | No significant differences in all measures between iron group and placebo                                                                                                                                                                                                 |
| LaManca <sup>26</sup>    | Healthy females                    | VO <sub>2</sub> max<br>Time to exhaustion<br>RER, HR, lactate                                          | Significant increases in VO <sub>2</sub> max in iron group compared to placebo; no difference in time to exhaustion, RER, HR or lactate.                                                                                                                                  |
| Newhouse <sup>24</sup>   | Young women                        | VO <sub>2</sub> max<br>Wingate anaerobic test<br>Anaerobic speed test                                  | No significant differences were observed between iron group and placebo                                                                                                                                                                                                   |

|                       |                                    |                                                                         |                                                                            |
|-----------------------|------------------------------------|-------------------------------------------------------------------------|----------------------------------------------------------------------------|
|                       |                                    | Ventilatory threshold<br>Muscle enzyme<br>assessments                   |                                                                            |
| Peeling <sup>34</sup> | Well-trained<br>female<br>athletes | VO <sub>2</sub> max<br>Submaximal economy<br>test<br>Time to exhaustion | No significant differences were observed between iron and placebo<br>group |
| Zhu <sup>25</sup>     | Physically<br>active women         | VO <sub>2</sub> max<br>15km time trial<br>TT lactates                   | No significant differences were observed between iron and placebo<br>group |

RER = respiratory exchange ratio; HRmax = maximum heart rate; km = kilometer; TT = time trial; RPE = rated perceived exertion;  
MVC = maximum ventilator capacity

1  
2  
3  
4  
5  
6  
7  
8  
9  
10  
11  
12  
13  
14  
15  
16  
17  
18  
19  
20  
21  
22  
23  
24  
25  
26  
27  
28  
29  
30  
31  
32  
33  
34  
35  
36  
37  
38  
39  
40  
41  
42  
43  
44  
45  
46  
47

**Appendix 7. Subgroup Analysis for Fatigue**

| Subgroup                             | Studies          | Participants (iron) | Participants (control) | Effect estimate (95% CI) | I <sup>2</sup> Value | Across Subgroups                |
|--------------------------------------|------------------|---------------------|------------------------|--------------------------|----------------------|---------------------------------|
| <b>Method of iron administration</b> |                  |                     |                        |                          |                      |                                 |
| Oral                                 | <sup>32,33</sup> | 173                 | 161                    | SMD -0.39 (-0.61, -0.18) | 0%                   | p = 0.82<br>I <sup>2</sup> = 0% |
| Intravenous                          | <sup>28,31</sup> | 187                 | 193                    | SMD -0.36 (-0.56, -0.16) | 0%                   |                                 |
| <b>Duration of study follow-up</b>   |                  |                     |                        |                          |                      |                                 |
| <2 months                            | <sup>28,33</sup> | 215                 | 211                    | SMD -0.43 (-0.62, -0.23) | 0%                   | p = 0.41<br>I <sup>2</sup> = 0% |
| >2 months                            | <sup>31,32</sup> | 145                 | 143                    | SMD -0.30 (-0.53, -0.07) | 0%                   |                                 |

Biologic sex, athletic status (athlete vs. non-athlete) and risk of bias subgroup analyses were unevaluable in subgroup analyses as all participants were females, of uncategorized athletic status. All trials were of unclear risk of bias. CI = confidence interval; SMD = standardized mean difference

## Appendix 8. Subgroup Analysis for Exercise Capacity

| Subgroup                             | Studies           | Participants (iron) | Participants (control) | Effect estimate (95% CI) | I <sup>2</sup> Value | Across Subgroups                 |
|--------------------------------------|-------------------|---------------------|------------------------|--------------------------|----------------------|----------------------------------|
| <b>Population</b>                    |                   |                     |                        |                          |                      |                                  |
| Athlete                              | 22-24,26,27,30,34 | 77                  | 80                     | SMD 0.22 (-0.10, 0.55)   | 3%                   | p = 0.25<br>I <sup>2</sup> = 24% |
| Non-athlete                          | 19,25             | 42                  | 36                     | SMD -0.10 (-0.55, 0.35)  | 0%                   |                                  |
| <b>Method of iron administration</b> |                   |                     |                        |                          |                      |                                  |
| Oral                                 | 19,22-26,30       | 104                 | 100                    | SMD 0.12 (-0.16, -0.39)  | 0%                   | p = 0.15<br>I <sup>2</sup> = 47% |
| IV                                   | 27                | 7                   | 8                      | SMD 0.88 (-0.20, 1.95)   | NA                   |                                  |
| IM                                   | 34                | 8                   | 8                      | SMD -0.59 (-1.59, 0.42)  | NA                   |                                  |

Biologic sex, duration of follow-up and risk of bias subgroup analyses were unevaluable in subgroup analyses as all trials enrolled females and had a follow-up period of less than two months. All trials were of unclear risk of bias. CI = confidence interval; SMD = standardized mean difference; IV = intravenous; IM = intramuscular

### Appendix 9. Adverse effects in trials of iron supplementation in iron-deficient, non anemic individuals

| Study                     | Constipation                                                                                                                                                               | Diarrhea            | Nausea              | GI intolerance        |
|---------------------------|----------------------------------------------------------------------------------------------------------------------------------------------------------------------------|---------------------|---------------------|-----------------------|
| <b>Intravenous</b>        |                                                                                                                                                                            |                     |                     |                       |
| Burden <sup>27</sup>      | NR                                                                                                                                                                         | NR                  | NR                  | NR                    |
| Favrat <sup>28</sup>      | NR                                                                                                                                                                         | NR                  | Iron: 8; Control: 2 | NR                    |
| Krayenbuehl <sup>31</sup> | NR                                                                                                                                                                         | Iron: 0; Control: 1 | Iron: 6; Control: 1 | NR                    |
| <b>Intramuscular</b>      |                                                                                                                                                                            |                     |                     |                       |
| Flink <sup>29</sup>       | NR                                                                                                                                                                         | NR                  | NR                  | Iron: 14; Control: 2  |
| <b>Oral</b>               |                                                                                                                                                                            |                     |                     |                       |
| Brownlie <sup>19</sup>    | NR                                                                                                                                                                         | NR                  | NR                  | NR                    |
| Brutsaert <sup>20</sup>   | "Frequency and severity of reported side effects due to supplementation was very low and did not differ significantly between groups"                                      |                     |                     |                       |
| Donangelo <sup>21</sup>   | NR                                                                                                                                                                         | NR                  | NR                  | NR                    |
| Fogelholm <sup>30</sup>   | NR                                                                                                                                                                         | NR                  | NR                  | NR                    |
| Hinton <sup>22</sup>      | NR                                                                                                                                                                         | NR                  | NR                  | NR                    |
| Klingshirn <sup>23</sup>  | NR                                                                                                                                                                         | NR                  | NR                  | Iron: 1; Control: 0   |
| LaManca <sup>26</sup>     | NR                                                                                                                                                                         | NR                  | NR                  | NR                    |
| Leonard <sup>18</sup>     | Iron: 1; Control: 0                                                                                                                                                        | Iron: 2; Control: 2 | Iron: 2; Control: 1 | NR                    |
| Moafi <sup>35</sup>       | "When symptoms occurring immediately before or during menses were excluded, there were no significant differences either in frequency or severity of symptoms experienced" |                     |                     |                       |
| Newhouse <sup>24</sup>    | NR                                                                                                                                                                         | NR                  | NR                  | NR                    |
| Peeling <sup>34</sup>     | NR                                                                                                                                                                         | NR                  | NR                  | NR                    |
| Vaucher <sup>32</sup>     | NR                                                                                                                                                                         | NR                  | NR                  | Iron: 12; Control: 10 |
| Verdon <sup>33</sup>      | NR                                                                                                                                                                         | NR                  | Iron: 0; control: 1 | NR                    |
| Zhu <sup>25</sup>         | NR                                                                                                                                                                         | NR                  | NR                  | NR                    |

NR, not reported; GI, gastrointestinal

### Appendix 10. Compliance with the study intervention

|                           | Iron (%) | Control (%) |
|---------------------------|----------|-------------|
| <b>Intravenous</b>        |          |             |
| Burden <sup>27</sup>      | 100      | 100         |
| Favrat <sup>28</sup>      | 100      | 100         |
| Krayenbuehl <sup>31</sup> | NR       | NR          |
| <b>Intramuscular</b>      |          |             |
| Peeling <sup>34</sup>     | NR       | NR          |
| <b>Oral</b>               |          |             |
| Brownlie <sup>19</sup>    | 91       | 89          |
| Brutsaert <sup>20</sup>   | NR       | NR          |
| Donangelo <sup>21</sup>   | NR       | NR          |
| Flink <sup>29</sup>       | 71       | 82          |
| Fogelholm <sup>30</sup>   | NR       | NR          |
| Hinton <sup>22</sup>      | 98       | 99          |
| Klingshirn <sup>23</sup>  | 89       | 91          |
| LaManca <sup>26</sup>     | 82       | 85          |
| Leonard <sup>18*</sup>    | 89       | 92          |
| Moafi <sup>35</sup>       | 89       | 92          |
| Newhouse <sup>24</sup>    | >75      | >75         |
| Vaucher <sup>32</sup>     | 93       | 94          |
| Verdon <sup>33</sup>      | 95       | 98          |
| Zhu <sup>25</sup>         | 88       | 87          |

\*weighted averaged between two iron treatment groups; NR = not reported

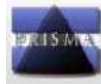

# PRISMA 2009 Checklist

| Section/topic                      | #  | Checklist item                                                                                                                                                                                                                                                                                              | Reported on page # |
|------------------------------------|----|-------------------------------------------------------------------------------------------------------------------------------------------------------------------------------------------------------------------------------------------------------------------------------------------------------------|--------------------|
| <b>TITLE</b>                       |    |                                                                                                                                                                                                                                                                                                             |                    |
| Title                              | 1  | Identify the report as a systematic review, meta-analysis, or both.                                                                                                                                                                                                                                         | 1                  |
| <b>ABSTRACT</b>                    |    |                                                                                                                                                                                                                                                                                                             |                    |
| Structured summary                 | 2  | Provide a structured summary including, as applicable: background; objectives; data sources; study eligibility criteria, participants, and interventions; study appraisal and synthesis methods; results; limitations; conclusions and implications of key findings; systematic review registration number. | 2                  |
| <b>INTRODUCTION</b>                |    |                                                                                                                                                                                                                                                                                                             |                    |
| Rationale                          | 3  | Describe the rationale for the review in the context of what is already known.                                                                                                                                                                                                                              | 4                  |
| Objectives                         | 4  | Provide an explicit statement of questions being addressed with reference to participants, interventions, comparisons, outcomes, and study design (PICOS).                                                                                                                                                  | 6                  |
| <b>METHODS</b>                     |    |                                                                                                                                                                                                                                                                                                             |                    |
| Protocol and registration          | 5  | Indicate if a review protocol exists, if and where it can be accessed (e.g., Web address), and, if available, provide registration information including registration number.                                                                                                                               | 5                  |
| Eligibility criteria               | 6  | Specify study characteristics (e.g., PICOS, length of follow-up) and report characteristics (e.g., years considered, language, publication status) used as criteria for eligibility, giving rationale.                                                                                                      | 6                  |
| Information sources                | 7  | Describe all information sources (e.g., databases with dates of coverage, contact with study authors to identify additional studies) in the search and date last searched.                                                                                                                                  | 6                  |
| Search                             | 8  | Present full electronic search strategy for at least one database, including any limits used, such that it could be repeated.                                                                                                                                                                               | Supp 3             |
| Study selection                    | 9  | State the process for selecting studies (i.e., screening, eligibility, included in systematic review, and, if applicable, included in the meta-analysis).                                                                                                                                                   | 7                  |
| Data collection process            | 10 | Describe method of data extraction from reports (e.g., piloted forms, independently, in duplicate) and any processes for obtaining and confirming data from investigators.                                                                                                                                  | 7                  |
| Data items                         | 11 | List and define all variables for which data were sought (e.g., PICOS, funding sources) and any assumptions and simplifications made.                                                                                                                                                                       | 6                  |
| Risk of bias in individual studies | 12 | Describe methods used for assessing risk of bias of individual studies (including specification of whether this was done at the study or outcome level), and how this information is to be used in any data synthesis.                                                                                      | 7                  |
| Summary measures                   | 13 | State the principal summary measures (e.g., risk ratio, difference in means).                                                                                                                                                                                                                               | 8                  |
| Synthesis of results               | 14 | Describe the methods of handling data and combining results of studies, if done, including measures of consistency (e.g., $I^2$ ) for each meta-analysis.                                                                                                                                                   | 8                  |

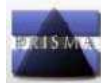

# PRISMA 2009 Checklist

Page 1 of 2

| Section/topic                 | #  | Checklist item                                                                                                                                                                                           | Reported on page # |
|-------------------------------|----|----------------------------------------------------------------------------------------------------------------------------------------------------------------------------------------------------------|--------------------|
| Risk of bias across studies   | 15 | Specify any assessment of risk of bias that may affect the cumulative evidence (e.g., publication bias, selective reporting within studies).                                                             | 7                  |
| Additional analyses           | 16 | Describe methods of additional analyses (e.g., sensitivity or subgroup analyses, meta-regression), if done, indicating which were pre-specified.                                                         | 8                  |
| <b>RESULTS</b>                |    |                                                                                                                                                                                                          |                    |
| Study selection               | 17 | Give numbers of studies screened, assessed for eligibility, and included in the review, with reasons for exclusions at each stage, ideally with a flow diagram.                                          | 9, Fig 1           |
| Study characteristics         | 18 | For each study, present characteristics for which data were extracted (e.g., study size, PICOS, follow-up period) and provide the citations.                                                             | 9                  |
| Risk of bias within studies   | 19 | Present data on risk of bias of each study and, if available, any outcome level assessment (see item 12).                                                                                                | 9                  |
| Results of individual studies | 20 | For all outcomes considered (benefits or harms), present, for each study: (a) simple summary data for each intervention group (b) effect estimates and confidence intervals, ideally with a forest plot. | 9, Fig 2           |
| Synthesis of results          | 21 | Present results of each meta-analysis done, including confidence intervals and measures of consistency.                                                                                                  | 10                 |
| Risk of bias across studies   | 22 | Present results of any assessment of risk of bias across studies (see Item 15).                                                                                                                          | 10, 11             |
| Additional analysis           | 23 | Give results of additional analyses, if done (e.g., sensitivity or subgroup analyses, meta-regression [see Item 16]).                                                                                    | 12                 |
| <b>DISCUSSION</b>             |    |                                                                                                                                                                                                          |                    |
| Summary of evidence           | 24 | Summarize the main findings including the strength of evidence for each main outcome; consider their relevance to key groups (e.g., healthcare providers, users, and policy makers).                     | 13                 |
| Limitations                   | 25 | Discuss limitations at study and outcome level (e.g., risk of bias), and at review-level (e.g., incomplete retrieval of identified research, reporting bias).                                            | 14                 |
| Conclusions                   | 26 | Provide a general interpretation of the results in the context of other evidence, and implications for future research.                                                                                  | 15                 |
| <b>FUNDING</b>                |    |                                                                                                                                                                                                          |                    |
| Funding                       | 27 | Describe sources of funding for the systematic review and other support (e.g., supply of data); role of funders for the systematic review.                                                               | 16                 |

From: Moher D, Liberati A, Tetzlaff J, Altman DG, The PRISMA Group (2009). Preferred Reporting Items for Systematic Reviews and Meta-Analyses: The PRISMA Statement. PLoS Med 6(6): e1000097. doi:10.1371/journal.pmed1000097

For more information, visit: [www.prisma-statement.org](http://www.prisma-statement.org).

Page 2 of 2

For peer review only - <http://bmjopen.bmj.com/site/about/guidelines.xhtml>



# BMJ Open

## Efficacy of iron supplementation on fatigue and physical capacity in non-anemic iron deficient adults: a systematic review of randomized controlled trials

|                                 |                                                                                                                                                                                                                                                                                                                                                                                                                                                                                                                                                                                                                                                                                                                                                                                                                                                                                                                                                                                                                                                                                                                                                                                              |
|---------------------------------|----------------------------------------------------------------------------------------------------------------------------------------------------------------------------------------------------------------------------------------------------------------------------------------------------------------------------------------------------------------------------------------------------------------------------------------------------------------------------------------------------------------------------------------------------------------------------------------------------------------------------------------------------------------------------------------------------------------------------------------------------------------------------------------------------------------------------------------------------------------------------------------------------------------------------------------------------------------------------------------------------------------------------------------------------------------------------------------------------------------------------------------------------------------------------------------------|
| Journal:                        | <i>BMJ Open</i>                                                                                                                                                                                                                                                                                                                                                                                                                                                                                                                                                                                                                                                                                                                                                                                                                                                                                                                                                                                                                                                                                                                                                                              |
| Manuscript ID                   | bmjopen-2017-019240.R1                                                                                                                                                                                                                                                                                                                                                                                                                                                                                                                                                                                                                                                                                                                                                                                                                                                                                                                                                                                                                                                                                                                                                                       |
| Article Type:                   | Research                                                                                                                                                                                                                                                                                                                                                                                                                                                                                                                                                                                                                                                                                                                                                                                                                                                                                                                                                                                                                                                                                                                                                                                     |
| Date Submitted by the Author:   | 21-Dec-2017                                                                                                                                                                                                                                                                                                                                                                                                                                                                                                                                                                                                                                                                                                                                                                                                                                                                                                                                                                                                                                                                                                                                                                                  |
| Complete List of Authors:       | Houston, Brett; University of Manitoba / CancerCare Manitoba, Hematology and Medical Oncology<br>Hurrie, Daryl; University of Manitoba<br>Graham, Jeff; University of Manitoba / CancerCare Manitoba, Hematology and Medical Oncology<br>Perija, Brittany; University of Manitoba, Department of Internal Medicine<br>Rimmer, Emily; University of Manitoba / CancerCare Manitoba, Hematology and Medical Oncology<br>Rabbani, Rasheda; University of Manitoba and George & Fay Yee Center for Healthcare Innovation<br>Bernstein, Charles; University of Manitoba, Gastroenterology<br>Turgeon, Alexis; Centre de Recherche du Centre Hospitalier Affilié Universitaire de Québec (CHA), Axe Traumatologie-urgence-soins intensifs, CHA-Hôpital de l'Enfant-Jésus, Université Laval, Anesthesia and Critical Care Medicine<br>Fergusson, Dean; Ottawa Hospital Research Institute<br>Houston, Donald; University of Manitoba / CancerCare Manitoba, Hematology and Medical Oncology<br>Abou-Setta, Ahmed; University of Manitoba and George & Fay Yee Center for Healthcare Innovation<br>Zarychanski, Ryan ; University of Manitoba / CancerCare Manitoba, Hematology and Medical Oncology |
| <b>Primary Subject Heading</b>: | Evidence based practice                                                                                                                                                                                                                                                                                                                                                                                                                                                                                                                                                                                                                                                                                                                                                                                                                                                                                                                                                                                                                                                                                                                                                                      |
| Secondary Subject Heading:      | Epidemiology, General practice / Family practice, Haematology (incl blood transfusion), Pharmacology and therapeutics, Global health                                                                                                                                                                                                                                                                                                                                                                                                                                                                                                                                                                                                                                                                                                                                                                                                                                                                                                                                                                                                                                                         |
| Keywords:                       | Iron deficiency, Iron supplementation, Fatigue, Exercise capacity, Systematic review                                                                                                                                                                                                                                                                                                                                                                                                                                                                                                                                                                                                                                                                                                                                                                                                                                                                                                                                                                                                                                                                                                         |
|                                 |                                                                                                                                                                                                                                                                                                                                                                                                                                                                                                                                                                                                                                                                                                                                                                                                                                                                                                                                                                                                                                                                                                                                                                                              |

SCHOLARONE™  
Manuscripts

# Efficacy of iron supplementation on fatigue and physical capacity in non-anemic iron deficient adults: a systematic review of randomized controlled trials

Brett L. Houston<sup>1,2</sup>, Daryl Hurrie<sup>3</sup>, Jeff Graham<sup>1,2</sup>, Brittany Perija<sup>4</sup>, Emily Rimmer<sup>1,2</sup>, Rasheda Rabbani<sup>5,6</sup>, Charles N. Bernstein<sup>7</sup>, Alexis Turgeon<sup>8</sup>, Dean Fergusson<sup>9</sup>, Donald S. Houston<sup>1,2</sup>, Ahmed M. Abou-Setta<sup>5,6</sup>, Ryan Zarychanski<sup>1,2,5,6</sup>

<sup>1</sup>Department of Internal Medicine, Section of Medical Oncology and Haematology, University of Manitoba, Winnipeg, Manitoba, Canada

<sup>2</sup>Department of Medical Oncology and Haematology, CancerCare Manitoba, Winnipeg, Manitoba, Canada

<sup>3</sup>Applied Health Sciences, Faculty of Kinesiology and Recreation Management, University of Manitoba, Winnipeg, Manitoba, Canada

<sup>4</sup>Department of Internal Medicine, Faculty of Medicine, University of Manitoba, Winnipeg, Manitoba, Canada

<sup>5</sup>George & Fay Yee Center for Healthcare Innovation, University of Manitoba/Winnipeg Regional Health Authority, Winnipeg, Manitoba, Canada

<sup>6</sup>Department of Community Health Sciences, University of Manitoba, Winnipeg, Manitoba, Canada

<sup>7</sup>Department of Internal Medicine, Section of Gastroenterology, University of Manitoba, Winnipeg, Manitoba, Canada

<sup>8</sup>Centre de recherche du CHU de Québec – Université Laval, Population Health and Optimal Health Practices Research Unit, Trauma - Emergency - Critical Care Medicine; Department of Anesthesiology and Critical Care Medicine, Division of Critical Care Medicine, Faculty of Medicine, Université Laval, Québec City, Québec, Canada.

<sup>9</sup>Clinical Epidemiology Program, Ottawa Hospital Research Institute (OHRI); Department of Medicine, University of Ottawa, Ottawa, Ontario, Canada

Corresponding author: Ryan Zarychanski  
ON 2051-675 McDermot Avenue  
CancerCare Manitoba  
Winnipeg, Manitoba, R3E OV9  
T: 204-787-2108  
F: 204-786-0196  
rzarychanski@cancercare.mb.ca

Short title: Iron therapy and fatigue

Document data: Abstract: 335 words; Text: 2754 words; Figures: 2; Tables: 2; Appendices: 12; References: 41

Systematic Review Registration: PROSPERO (CRD42014007085)

1  
2  
3 OBJECTIVE: Iron supplementation in iron deficiency anemia is standard practice, but  
4  
5 the benefits of iron supplementation in iron deficient non-anemic (IDNA) individuals  
6  
7 remains controversial. Our objective is to identify the effects of iron therapy on fatigue  
8  
9 and physical capacity in iron deficient non-anemic adults.  
10  
11

12 DESIGN: Systematic review and meta-analysis of randomized controlled trials (RCTs)  
13

14 SETTING: Primary care  
15

16 PARTICIPANTS: Adults ( $\geq 18$  years) who were iron deficient but non-anemic  
17  
18

19 INTERVENTIONS: Oral, intramuscular or intravenous iron supplementation; all therapy  
20  
21 doses, frequencies and durations were included  
22  
23

24 COMPARATORS: Placebo or active therapy  
25

26 RESULTS: We identified RCTs in Medline, Embase, CENTRAL, CINAHL,  
27  
28 SportDiscus, and CAB Abstracts from inception to October 31, 2016. We searched the  
29  
30 World Health Organization's ICTRP for relevant ongoing trials and performed forward  
31  
32 searches of included trials and relevant reviews in Web of Science. We assessed internal  
33  
34 validity of included trials using the Cochrane Risk of Bias tool, and the external validity  
35  
36 using the GRADE methodology. From 11580 citations we included 18 unique trials, and  
37  
38 2 companion papers enrolling 1170 patients. Using a Mantel-Haenszel random-effects  
39  
40 model, iron supplementation was associated with reduced self-reported fatigue  
41  
42 (standardized mean difference (SMD) -0.38; 95% CI -0.52 to -0.23;  $I^2$  0%; 4 trials; 714  
43  
44 participants), but was not associated with differences in objective measures of physical  
45  
46 capacity, including maximal oxygen consumption ( $VO_2$  max) (SMD 0.11; 95% CI -0.15  
47  
48 to 0.37;  $I^2$  0%; 9 trials; 235 participants), and timed methods of exercise testing. Iron  
49  
50 supplementation significantly increased serum hemoglobin concentration (MD 4.01 g/L;  
51  
52  
53  
54  
55  
56  
57  
58  
59  
60

1  
2  
3 95% CI 1.22 to 6.81;  $I^2 = 48\%$ ; 12 trials; 298 participants) and serum ferritin (MD 9.23  
4  
5  $\mu\text{mol/L}$ ; 95% CI 6.48 to 11.97;  $I^2 58\%$ ; 14 trials; 616 participants).

7 CONCLUSION: In iron deficient non-anemic adults, iron supplementation is associated  
8  
9  
10 with reduced subjective measures of fatigue, but not with objective improvements in  
11  
12 physical capacity. Given the global prevalence of both iron deficiency and fatigue,  
13  
14 patients and practitioners could consider consumption of iron-rich foods or iron  
15  
16 supplementation to improve symptoms of fatigue in the absence of documented anemia.  
17  
18

19 SYSTEMATIC REVIEW REGISTRATION: PROSPERO (CRD42014007085)  
20  
21  
22  
23  
24  
25  
26  
27  
28  
29  
30  
31  
32  
33  
34  
35  
36  
37  
38  
39  
40  
41  
42  
43  
44  
45  
46  
47  
48  
49  
50  
51  
52  
53  
54  
55  
56  
57  
58  
59  
60

## STUDY STRENGTHS and LIMITATIONS:

### Strengths:

- We used a comprehensive search strategy, an *a priori* protocol, and adhered to established methodological (e.g. PRISMA, GRADE) guidelines
- We identified an at-risk patient population, for whom iron deficiency is highly prevalent, but treatment is unknown
- Our outcomes are clinically relevant and patient centered

### Limitations:

- In our selected population of iron deficient but not anemic individuals, the majority of studies evaluated healthy females
- In the included trials, tolerability and adverse events of iron therapy was incompletely captured

## INTRODUCTION

Iron deficiency (ID) is estimated to affect two billion people, and is the leading cause of anemia worldwide<sup>1,2</sup>. Iron is necessary for cellular immune responses, oxidative metabolism within the mitochondria, and production of hemoglobin and myoglobin.

When iron losses exceed dietary iron absorption, iron stores become depleted resulting in impaired hemoglobin production and decreased red blood cell hemoglobin content<sup>3</sup>.

Reduction in hemoglobin concentration below a threshold (conventionally defined by the World Health Organization (WHO) as 120g/L for females and 130g/L for males) signifies anemia<sup>4</sup>.

It is well established that anemia results in decreased physical capacity and increased fatigue proportional to anemia severity<sup>5-9</sup>. Unfortunately, patient-reported fatigue is common in community and primary care settings with a prevalence ranging

1  
2  
3 from 7 to 45%<sup>10</sup>. It is estimated that the indirect annual economic consequence of chronic  
4  
5 fatigue in the United States is 9.1 billion dollars<sup>11</sup>.  
6

7  
8 The clinical relevance of iron deficiency in the absence of anemia is poorly  
9  
10 understood, but may impact well-being, perceptions of fatigue, or contribute to  
11  
12 decrements in physical performance through impairment in biochemical processes  
13  
14 including tissue and mitochondrial oxidative capacity<sup>8</sup>. While iron replacement can  
15  
16 normalize hemoglobin concentration, restore work capacity and improve fatigue in iron  
17  
18 deficiency anemia, it is unclear if supplementation affects fatigue and physical capacity in  
19  
20 iron deficient but non-anemic (IDNA) individuals. In the absence of compelling efficacy  
21  
22 data on well-being or muscle function, the use of iron supplements are common in the  
23  
24 general population and are routinely recommended to high performance athletes to  
25  
26 enhance performance.  
27  
28  
29

30  
31 Given the global prevalence of iron deficiency and impact of fatigue, the purpose  
32  
33 of this systematic review is to identify, critically appraise and meta-analyse data from  
34  
35 prospective randomized trials evaluating iron therapy in adults with IDNA.  
36  
37  
38  
39

## 40 METHODS

41  
42 Using an *a priori* published protocol (CRD42014007085; available at  
43  
44 <https://www.crd.york.ac.uk/PROSPERO/>)<sup>12</sup>, we conducted a systematic review using  
45  
46 methodological approaches outlined in the *Cochrane Handbook for Systematic Reviewers*  
47  
48 and reported according to the Preferred Reporting Items for Systematic Reviews and  
49  
50 Meta-Analysis (PRISMA) criteria<sup>12-14</sup>. A panel of experts from multiple fields (e.g.  
51  
52 internal medicine, hematology, kinesiology, gastroenterology, research methodology)  
53  
54  
55  
56  
57  
58  
59  
60

1  
2  
3 formulated the research question, reviewed search strategies and methods, and provided  
4  
5 input throughout the review process.  
6  
7  
8  
9

## 10 Populations, Interventions, Comparators, Outcome Measures, Setting and Study Designs

11  
12 Our research question was “In iron depleted but non-anemic adults, does iron  
13  
14 supplementation improve fatigue and physical capacity.” We included randomized  
15  
16 controlled trials of adults ( $\geq 18$  years) who were iron deficient but non-anemic (Appendix  
17  
18 1). Interventions included oral, intramuscular or intravenous iron supplementation; all  
19  
20 therapy doses, frequencies and durations were included. We included trials that evaluated  
21  
22 outcomes at least 28 days from the initiation of iron therapy. Comparators included  
23  
24 placebo or active therapy. Our exclusion criteria are presented in Appendix 2.  
25  
26  
27

28 Our primary outcome measures were self-reported fatigue and objective measures of  
29  
30 physical capacity. Secondary outcomes included the incidence of anemia, change in  
31  
32 hemoglobin concentration and serum ferritin, and the incidence of adverse outcomes  
33  
34 including iron toxicity, constipation, diarrhea, gastrointestinal intolerance and nausea.  
35  
36  
37  
38  
39

## 40 Search Strategy for Identification of Studies

41  
42 We searched Medline, Embase, CENTRAL (Cochrane Library), CINAHL,  
43  
44 SportDiscus, and CAB Abstracts from inception to October 31, 2016 to identify relevant  
45  
46 citations of published trials, using individualized systematic search strategies for each  
47  
48 database. The MEDLINE strategy is presented in Appendix 3. We searched the World  
49  
50 Health Organization's (WHO) International Clinical Trials Registry Platform (ICTRP),  
51  
52 clinicaltrials.gov and relevant conference proceedings to identify planned, ongoing, or  
53  
54  
55  
56  
57  
58  
59  
60

1  
2  
3 recently completed but unpublished trials. We performed forward searches of included  
4 trials and relevant reviews in Web of Science to identify additional citations, and  
5  
6 contacted study authors to request pertinent unpublished data or provide clarifications on  
7  
8 study methods or results. Reference lists of narrative and systematic reviews and of the  
9  
10 included trials were searched for additional citations. We performed reference  
11  
12 management in EndNote™ (Version X7, Thomson Reuters, Philadelphia, PA, USA).  
13  
14  
15  
16  
17  
18

### 19 Study Selection, Data Extraction and Quality Assessment

20  
21 We screened citations, selected studies and extracted data from included trials  
22 using standardized and piloted screening and data extraction forms. Citation screening,  
23 study selection and data extraction were performed in duplicate. The following data were  
24 extracted from each trial: author identification, publication year, publication language,  
25  
26 trial location, source of trial funding, participant characteristics (age, sex, weight),  
27  
28 intervention/comparator (drug utilized, dose (elemental iron), route of administration,  
29  
30 duration), as well as results for the primary and secondary outcomes. We assessed the  
31  
32 internal validity of included trials using the Cochrane Collaboration Risk of Bias tool<sup>13</sup>.  
33  
34 Discrepancies between the two reviewers were resolved by consensus or by a third  
35  
36 reviewer (RZ), as required. Data extraction and descriptive statistics were performed  
37  
38 using Microsoft Excel 2016 (Excel version 15, Microsoft Corp).  
39  
40  
41  
42  
43  
44  
45  
46  
47  
48

### 49 Data Analysis

50  
51 Data analysis was performed using Review Manager (RevMan v5.3.5, The Nordic  
52  
53 Cochrane Center, The Cochrane Collaboration, Copenhagen, Denmark). Study level  
54  
55  
56  
57  
58  
59  
60



1  
2  
3 comparisons of dichotomous data were presented as risk ratios (RR) with 95%  
4  
5 confidence intervals (CI). Pooled continuous data were expressed as the mean difference  
6  
7 (MD), or standardized mean difference (SMD). Change scores or post-treatment means  
8  
9 were extracted to inform summary estimates for continuous data. Pooled risk ratios and  
10  
11 95% confidence intervals were calculated using Mantel-Haenszel random-effects model.  
12  
13 Pooled MDs or SMDs were calculated using a random-effects model. For the primary  
14  
15 outcome of fatigue, if multiple scales were reported, fatigue-specific scores were  
16  
17 preferred over general scores and the most commonly reported and clinically meaningful  
18  
19 score was used to generate summary effect measures. In studies evaluating exercise  
20  
21 capacity, weight-based VO<sub>2</sub> max values were utilized preferentially if both absolute and  
22  
23 weight-based VO<sub>2</sub> max results were provided. Statistical heterogeneity was quantified  
24  
25 using the I<sup>2</sup> statistic<sup>15</sup>. For the primary outcomes of fatigue and work capacity, we  
26  
27 evaluated potential publication bias using funnel plot analysis<sup>16</sup>. All tests of statistical  
28  
29 inference reflect a 2-sided  $\alpha$  of 0.05.  
30  
31  
32  
33  
34  
35  
36  
37

### 38 Subgroup Analyses

39  
40 We performed subgroup analyses for fatigue and exercise capacity outcomes  
41  
42 according to biologic sex, athletic status (athlete or non-athlete), method of iron  
43  
44 administration, duration of therapy, duration of study follow up, and risk of bias.  
45  
46  
47  
48

### 49 Grading the Evidence

50  
51  
52  
53  
54  
55  
56  
57  
58  
59  
60

1  
2  
3 We graded the strength of evidence for our primary outcomes using the GRADE  
4 methodology. This approach classifies the strength of evidence as “*high*”, “*moderate*”,  
5 “*low*” or “*very low*.”  
6  
7  
8  
9  
10

## 11 RESULTS

### 12 Trial Characteristics & Study Populations

13  
14  
15 Of the 11,580 citations identified, we included 18 unique trials and two  
16 companion papers<sup>17,18</sup>, enrolling 1170 subjects (Figure 1; Table 1). Trials were published  
17 between 1989 and 2015, and all trials were published in peer-reviewed journals. Eight  
18 trials<sup>19-26</sup> were from North America, seven trials<sup>27-33</sup> were from Europe, two trials<sup>18,34</sup>  
19 were from Australia, and one trial<sup>35</sup> was from Asia.  
20  
21  
22  
23  
24  
25  
26  
27  
28

29 Exclusively healthy females (aged 17 to 55 years old) with varying levels of  
30 fitness (sedentary to well-trained) were enrolled in all but three studies<sup>22,27,29</sup>. The WHO  
31 cutoff for anemia [hemoglobin concentration  $\geq 130$  g/L (males) and  $\geq 120$  g/L (females)]  
32 was used by 9 studies<sup>19,22-25,30-32,35</sup>, whereas 7 studies used lower values ranging from  
33  $\geq 110$  to  $< 120$  g/L<sup>20,21,27,28,33,34,36</sup>, and baseline hemoglobin concentration was not provided  
34 in 2 trial reports<sup>26,29</sup>.  
35  
36  
37  
38  
39  
40  
41  
42

43 All trials were placebo-controlled. In 13 of 18 trials (72%), we considered the  
44 blinding of participants and personnel to be adequate. Likewise, 10 trials (55%)  
45 adequately incorporated blinded outcome assessment. One trial<sup>29</sup> was considered to have  
46 a low risk of bias (Table 2). The remainder of the trials were considered unclear risk of  
47 bias, due to unclear processes of randomization (12 trials<sup>19-27,30,33,34</sup>) or allocation  
48 concealment (13 trials<sup>19-27,30,31,34,35</sup>).  
49  
50  
51  
52  
53  
54  
55  
56  
57  
58  
59  
60

**Table 1. Characteristics of individual trials, patient populations and interventions**

| Trial #       | Source                    | Population                                      | No. of patients (iron) | No. of patients (control) | Control        | Age (range) | Min Hb (g/L)     | Max ferritin (ug/L) | Iron type             | Daily iron dose (mg) | Iron route | Iron duration (days) | Follow-up (days) |
|---------------|---------------------------|-------------------------------------------------|------------------------|---------------------------|----------------|-------------|------------------|---------------------|-----------------------|----------------------|------------|----------------------|------------------|
| 1             | Brownlie <sup>17,19</sup> | Physically active untrained women               | 22                     | 19                        | Placebo        | 18-33       | 120              | 16                  | Ferrous sulfate       | 16                   | PO         | 42                   | 42               |
| 2             | Brutsaert <sup>20</sup>   | Untrained women                                 | 10                     | 10                        | Placebo        | 18-45       | 110              | 20                  | Ferrous sulfate       | 18.1                 | PO         | 42                   | 42               |
| 3             | Burden <sup>27</sup>      | University endurance runners                    | 7                      | 8                         | Saline         |             | 120              | 30 (F); 40 (M)      | Ferric carboxymaltose | 500                  | IV         | 1                    | 28               |
| 4             | Donangelo <sup>21</sup>   | Young women                                     | 12                     | 11                        | Zinc gluconate | 20-28       | 110              | 20                  | Ferrous sulfate       | 100                  | PO         | 56                   | 70               |
| 5             | Favrat <sup>28</sup>      | Premenopausal women with fatigue                | 144                    | 146                       | Saline         |             | 115              | 15                  | Ferric carboxymaltose | 1000                 | IV         | 1                    | 56               |
| 6             | Flink <sup>29</sup>       | Individuals with low unstimulated salivary flow | 25                     | 21                        | Placebo        | 15-46       |                  | 30 (F); 50 (M)      | Ferrous fumarate      | 120                  | PO         | 90                   | 90               |
| 7             | Fogelholm <sup>30</sup>   | Female athletes                                 | 17                     | 14                        | Placebo        | 17-31       | 120              | 25                  | Ferrous sulfate       | 100                  | PO         | 56                   | 56               |
| 8             | Hinton <sup>22</sup>      | Recreationally trained individuals              | 9                      | 8                         | Placebo        | 18-41       | 120 (F); 130 (M) | 16                  | Ferrous sulfate       | 30                   | PO         | 42                   | 42               |
| 9             | Klingshim <sup>23</sup>   | Female endurance runners                        | 9                      | 9                         | Placebo        | 22-39       | 120              | 20                  | Ferrous sulfate       | 100                  | PO         | 56                   | 56               |
| 10            | Krayenbuehl <sup>31</sup> | Premenopausal women with fatigue                | 43                     | 47                        | Saline         |             | 120              | 50                  | Venofer               | 200                  | IV         | 4                    | 84               |
| 11            | LaManca <sup>26</sup>     | Healthy females                                 | 28                     | 28                        | Placebo        |             |                  | 20                  | Ferrous sulfate       | 100                  | PO         | 56                   | 56               |
| 12            | Leonard <sup>18,36*</sup> | Young women                                     | 16*                    | 8                         | Placebo        | 18-35       | 115              | 20                  | Ferrous sulfate       | 60/80                | PO         | 112                  | 112              |
| 13            | Moafi <sup>35</sup>       | Female students                                 | 36                     | 36                        | Placebo        | 18-35       | 120              | 20                  | Ferrous sulfate       | 50                   | PO         | 42                   | 42               |
| 14            | Newhouse <sup>24</sup>    | Young women                                     | 19                     | 21                        | Placebo        | 18-40       | 120              | 20                  | Ferrous sulfate       | 200                  | PO         | 56                   | 56               |
| 15            | Peeling <sup>34</sup>     | Well-trained female athletes                    | 8                      | 8                         | Saline         |             | 115              | 35                  | Ferrum H              | 100                  | IM         | 5                    | 28               |
| 16            | Vaucher <sup>32</sup>     | Women with fatigue from clinic                  | 102                    | 96                        | Placebo        | 18-50       | 120              | 50                  | Ferrous sulfate       | 80                   | PO         | 84                   | 84               |
| 17            | Verdon <sup>33</sup>      | Women with fatigue from clinic                  | 71                     | 65                        | Placebo        | 18-55       | 117              |                     | Ferrous sulfate       | 80                   | PO         | 28                   | 28               |
| 18            | Zhu <sup>25</sup>         | Physically active women                         | 20                     | 17                        | Placebo        | 19-36       | 120              | 16                  | Ferrous sulfate       | 135.3                | PO         | 56                   | 56               |
| <b>TOTAL:</b> |                           |                                                 | <b>598</b>             | <b>572</b>                |                |             |                  |                     |                       |                      |            |                      |                  |

\*Trial included two intervention arms, with 8 patients enrolled in each arm; represents weighted averages between two iron treatment groups; Max = maximum; Min = minimum; Hb = hemoglobin; F = females; M = males; PO = oral; IM = intramuscular; IV = intravenous

**Table 2. Cochrane Risk of Bias summary.** Green (+) = low risk of bias; Yellow (?) = unclear risk of bias

|                           | OVERALL | Random sequence generation | Allocation concealment | Blinding of participants and personnel | Blinding of outcome assessment | Incomplete outcome data | Selective reporting | Other |
|---------------------------|---------|----------------------------|------------------------|----------------------------------------|--------------------------------|-------------------------|---------------------|-------|
| Brownlie <sup>17,19</sup> | ?       | ?                          | ?                      | +                                      | ?                              | ?                       | +                   | +     |
| Brutsaert <sup>20</sup>   | ?       | ?                          | ?                      | +                                      | ?                              | ?                       | +                   | +     |
| Burden <sup>27</sup>      | ?       | ?                          | ?                      | +                                      | +                              | +                       | +                   | +     |
| Donangelo <sup>21</sup>   | ?       | ?                          | ?                      | ?                                      | ?                              | +                       | +                   | +     |
| Favrat <sup>28</sup>      | ?       | +                          | +                      | ?                                      | ?                              | ?                       | +                   | +     |
| Flink <sup>29</sup>       | +       | +                          | +                      | +                                      | +                              | +                       | +                   | +     |
| Fogelholm <sup>30</sup>   | ?       | ?                          | ?                      | +                                      | +                              | +                       | +                   | +     |
| Hinton <sup>22</sup>      | ?       | ?                          | ?                      | ?                                      | ?                              | +                       | +                   | +     |
| Klingshirn <sup>23</sup>  | ?       | ?                          | ?                      | +                                      | ?                              | +                       | +                   | +     |
| Krayenbuehl <sup>31</sup> | ?       | +                          | ?                      | +                                      | +                              | +                       | ?                   | +     |
| LaManca <sup>26</sup>     | ?       | ?                          | ?                      | ?                                      | ?                              | +                       | +                   | +     |
| Leonard <sup>18,36</sup>  | ?       | +                          | +                      | +                                      | +                              | ?                       | +                   | +     |
| Moafi <sup>35</sup>       | ?       | +                          | ?                      | +                                      | +                              | +                       | +                   | +     |
| Newhouse <sup>24</sup>    | ?       | ?                          | ?                      | +                                      | +                              | ?                       | +                   | +     |
| Peeling <sup>34</sup>     | ?       | ?                          | ?                      | ?                                      | ?                              | +                       | +                   | +     |
| Vaucher <sup>32</sup>     | ?       | +                          | +                      | +                                      | +                              | ?                       | +                   | +     |
| Verdon <sup>33</sup>      | ?       | ?                          | +                      | +                                      | +                              | +                       | +                   | +     |
| Zhu <sup>25</sup>         | ?       | ?                          | ?                      | +                                      | +                              | +                       | +                   | +     |

## Interventions

Iron interventions consisted of iron supplementation administered orally, intramuscularly or intravenously. Of the trials evaluating oral supplements, all but one<sup>29</sup> used ferrous sulfate (13 trials<sup>19-26,30,32,33,35,36</sup>, 713 participants). Intravenous iron was administered in three trials<sup>27,28,31</sup> (395 participants), and intramuscular iron in one trial<sup>34</sup> (16 participants). In trials using oral iron<sup>19-26,29,30,32,33,35,36</sup>, the mean daily elemental iron dose was 86.9mg ( $\pm$  49.1mg; range: 16 to 200mg). In trials reporting intravenous iron<sup>27,28,31</sup>, the mean daily elemental iron dose was 566mg ( $\pm$  330mg; range 200 to 1000mg) and mean total elemental iron dose 767mg ( $\pm$  206mg; range 500 to 1000mg). Among all studies, the mean duration of iron therapy was 46 days ( $\pm$  30 days; range 1 to 112 days), and mean duration of follow-up was 57 days ( $\pm$  24 days; range 28 to 112 days).

## Primary Outcomes

### *Fatigue*

Four trials<sup>28,31-33</sup> enrolling 714 participants were eligible for meta-analysis. Iron supplementation was associated with a reduction in subjective measures of fatigue when assessed by either the Piper Fatigue Scale (PFS),<sup>28</sup> the Current and Past Psychological State scale (CAPPS),<sup>32</sup> visual analog scale<sup>33</sup> or Brief Fatigue Inventory questionnaire (BFI)<sup>31</sup> (SMD -0.38; 95% CI -0.52 to -0.23;  $I^2$  0%) (Figure 2). In one trial using the BFI score, fatigue was not significantly different between groups after 12 weeks, although it was improved in the subgroup of participants with the lowest iron stores (ferritin  $\leq$  15 ng/ml or transferrin saturation  $\leq$  20%)<sup>31</sup>. Evaluation of publication bias was not possible due to the low number of included trials. Given that the majority of trials were of unclear risk of bias, we graded the overall strength of evidence as moderate.

### *Physical Capacity*

Physical capacity was reported in 10 trials<sup>19,20,22-27,30,34</sup> (291 participants); all but one<sup>20</sup> of the trials employed at least one of three common aerobic tests of physical capacity: time trial<sup>22,25</sup>, time to exhaustion<sup>23,26,27,34</sup>, or VO<sub>2</sub> max<sup>19,22-27,30,34</sup> performance from a graded exercise test. In two trials (79 participants) that used 15 km time trials<sup>22,25</sup>, iron supplementation was not associated with improved exercise capacity (SMD -0.09; 95% CI -0.53 to 0.35;  $I^2$  0%) (Appendix 4A). In four trials<sup>23,26,27,34</sup> (69 participants) that used time-to-exhaustion tests, iron supplementation did not significantly improve exercise capacity (SMD 0.25; 95% CI -0.22 to 0.73;  $I^2$  0%) (Appendix 4B). Nine

1  
2  
3 trials<sup>19,22-27,30,34</sup> (235 participants) reported VO<sub>2</sub> max as a surrogate measure of physical  
4  
5 capacity. Iron supplementation did not increase VO<sub>2</sub> max (SMD 0.11; 95% CI -0.15 to  
6  
7 0.37; I<sup>2</sup> 0%) (Appendix 4C). We found no evidence of funnel plot asymmetry to suggest  
8  
9 publication bias for this outcome (Appendix 5). The overall strength of the evidence for  
10  
11 time trial, time to exhaustion and VO<sub>2</sub> max outcomes were low, given the imprecision of  
12  
13 effect estimates and that the majority of trials were of unclear risk of bias.  
14  
15

16  
17 One trial<sup>20</sup> (20 participants) used dynamic knee extension exercise to evaluate  
18  
19 changes in physical capacity. In this trial, the decline in maximum voluntary contraction  
20  
21 after 6 minutes of exercise was significantly less in participants randomized to receive  
22  
23 iron. Among 16 other unique measures of physical capacity, 19% (3 of 16) found  
24  
25 statistically significant increases in measures of physical capacity with iron  
26  
27 supplementation (Appendix 6).  
28  
29  
30  
31  
32

### 33 *Subgroup analysis*

34  
35 Subgroup analyses based on method of iron administration and duration of  
36  
37 follow-up demonstrated no statistically significant differences in subjective fatigue  
38  
39 (Appendix 7). Biologic sex, athletic status (athlete vs. non-athlete) and risk of bias could  
40  
41 not be evaluated as all trials contributing data to the meta-analyses enrolled females of  
42  
43 uncharacterized athletic status, and were of unclear risk of bias<sup>28,31-33</sup>. Subgroup analyses  
44  
45 evaluating athletic status and method of iron administration demonstrated no statistically  
46  
47 significant differences in objective physical capacity (Appendix 8). Biologic sex, duration  
48  
49 of follow-up and risk of bias were unevaluable as all trials enrolled females with follow-  
50  
51 up of less than 2 months, and all were of unclear risk of bias<sup>19,22-27,30,34</sup>.  
52  
53  
54  
55  
56  
57  
58  
59  
60

## Secondary Outcomes and Adverse Events

Despite the absence of baseline anemia, iron supplementation significantly increased serum hemoglobin concentration (MD 4.01 g/L; 95% CI 1.22 to 6.81;  $I^2 = 48\%$ ; 12 trials; 298 participants)<sup>18-27,30,34</sup> (Appendix 9). In two trials<sup>25,28</sup> reporting incident anemia, a new diagnosis of anemia at trial completion was less common in patients randomized to receive iron supplementation. Iron supplementation also significantly increased serum ferritin (MD 9.23  $\mu\text{mol/L}$ ; 95% CI 6.48 to 11.97;  $I^2 = 58\%$ ; 14 trials; 616 participants) (Appendix 10).

Adverse events were sparsely reported. Gastrointestinal intolerance was reported in three trials<sup>23,29,32</sup>, and was significantly increased in one trial<sup>29</sup> using intramuscular iron administration, but not in the two trials<sup>23,32</sup> that used oral administration. Nausea was reported in four trials<sup>18,28,31,33</sup>; two trials<sup>28,31</sup> using intravenous administration of iron reported significantly increased nausea, whereas nausea was not increased in patients who received iron by oral administration<sup>18,33</sup>. Constipation was reported in one trial<sup>18</sup>, and diarrhea in two trials<sup>18,31</sup> (Appendix 11). Adherence with the study intervention was reported in 13 trials<sup>18,19,22-29,32,33,35</sup>. Iron supplementation was not associated with differential rates of medication adherence (RR 1.0; CI 95% 0.99 to 1.01;  $I^2 = 0\%$ ; 12 trials; 958 participants). The route of administration of the study intervention was also not associated with differences in adherence (Appendix 12).

## DISCUSSION

1  
2  
3 In iron deficient but non-anemic adults, we found iron supplementation was  
4 associated with reduced subjective measures of fatigue but had no significant impact on  
5 objective physical capacity. Given iron deficiency is the most prevalent micronutrient  
6 deficiency worldwide<sup>2</sup>, there is a discrepant lack of robust evidence evaluating iron  
7 supplementation in the absence of anemia across important patient populations. Despite  
8 rigorous and systematic methodology, we were only able to identify 18 trials enrolling  
9 1170 adults, representing a minute fraction of affected individuals.  
10  
11  
12  
13  
14  
15  
16  
17  
18

19 While treatment of iron deficiency in the absence of anemia is associated with  
20 reduced subjective fatigue, whether this translates to clinically meaningful outcomes,  
21 including quality of life, work absenteeism, job or athletic performance is uncertain.  
22  
23 Contrary to iron deficiency with established anemia, lack of robust data in iron deficient  
24 but non-anemic individuals is reflected in the under-representation of guideline  
25 recommendations pertaining to this larger population. The proportion of iron deficient,  
26 non-anemic individuals who receive supplementation is further unknown.  
27  
28  
29  
30  
31  
32  
33  
34

35 Our systemic review builds on the results of three published evidence syntheses  
36 evaluating iron supplementation<sup>37-39</sup>. In a systematic review of healthy menstruating  
37 women, iron supplementation, irrespective of iron status or anemia, improved  
38 hemoglobin and measures of iron stores<sup>37</sup>. Two systematic reviews included studies of  
39 pregnant women, blood donors and children, and included data from both randomized  
40 and non-randomized trials<sup>38,39</sup>. These studies concluded benefit of iron supplementation,  
41 although in the review by *Yokoi et al*, the benefit was limited to randomized controlled  
42 trials. Despite the high prevalence of iron deficiency, significant heterogeneity in patient  
43  
44  
45  
46  
47  
48  
49  
50  
51  
52  
53  
54  
55  
56  
57  
58  
59  
60



1  
2  
3 populations and study designs, and absence of data pertaining to objective muscle  
4 performance limits the generalizability of these findings.  
5  
6

7  
8 In trials where a proportion of participants were anemic at enrollment, and with  
9 the knowledge that anemia results in decreased physical capacity, iron supplementation  
10 has previously been associated with improved maximal and submaximal exercise  
11 performance<sup>5-8</sup>. We found insufficient evidence to suggest that iron supplementation  
12 improves exercise capacity in iron-depleted non-anemic adults, differing from the results  
13 of physiologic experiments that describe VO<sub>2</sub> max improvements with iron  
14 supplementation, independent of hemoglobin<sup>40</sup>. These findings were postulated to be  
15 secondary to iron-mediated improvements in muscle oxidative capacity and improved  
16 mitochondrial function, the validity of which is unclear<sup>40</sup>.  
17  
18  
19  
20  
21  
22  
23  
24  
25  
26  
27

28 A potential weakness our systematic review is the difficulty masking oral iron due  
29 to predictable gastrointestinal side effects and changes in stool color, and the impact of  
30 imperfect blinding on subjective measures of fatigue. However, despite this, fatigue was  
31 consistently reduced in trials evaluating both oral (n = 2) and intravenous (n = 2) iron  
32 preparations. Healthy females comprised the study population in 15 of 18 included trials;  
33 subjective measures of fatigue may not consistently apply to other at-risk populations.  
34  
35 The duration of follow was relatively short (57 days; range 28-112 days) and perhaps too  
36 brief to expect significant changes in muscle metabolism or function. Finally, the lack of  
37 systematic reporting of adverse events impairs our ability to draw conclusions regarding  
38 the incidence of these events and tolerability of iron therapy.  
39  
40  
41  
42  
43  
44  
45  
46  
47  
48  
49  
50

51 The strengths of this review include the comprehensiveness of the search strategy,  
52 which included electronic databases, trial registries, and forward searches. We used an *a*  
53  
54  
55  
56  
57  
58  
59  
60

1  
2  
3 *priori* published protocol and followed established methodological guidelines concerning  
4  
5 the conduct and reporting of this review. We synthesized patient-centered outcomes and  
6  
7 evaluated efficacy in the context of relevant safety outcomes and adverse events. In  
8  
9 contrast to the systematic review of *Low et al*, we excluded studies that enrolled patients  
10  
11 with anemia at baseline<sup>37</sup>. While cut-offs for anemia varied slightly among included  
12  
13 trials, this important inclusion criteria reduces (but may not eliminate) the probability that  
14  
15 changes in fatigue or muscle function are due to correction of anemia or independent of  
16  
17 oxygen carrying capacity reflecting increased red cell mass. While the duration of follow  
18  
19 up in most studies was modest, the mean daily elemental iron dose ( $86.9 \pm 49.1$ mg)  
20  
21 reflects a recommended 'treatment' for patients with iron deficiency anemia<sup>41</sup>.  
22  
23  
24  
25

26 In iron deficient non-anemic adults, iron supplementation is associated with  
27  
28 reduced subjective measures of fatigue, but not with objective improvements in physical  
29  
30 capacity. Given the global prevalence of both iron deficiency and fatigue, patients and  
31  
32 practitioners could consider consumption of iron-rich foods or iron supplementation to  
33  
34 improve symptoms of fatigue in the absence of documented anemia.  
35  
36  
37  
38  
39  
40  
41  
42  
43  
44  
45  
46  
47  
48  
49  
50  
51  
52  
53  
54  
55  
56  
57  
58  
59  
60

1  
2  
3 *Figure Legends:*  
4

5 **Figure 1. Study flow diagram following the Preferred Reporting Items of Systematic**  
6 **Reviews and Meta-Analyses (PRISMA)<sup>14</sup> with modifications.** Of the 11,580 citations  
7 identified, we included 18 unique trials and two companion papers.  
8

9  
10 **Figure 2. The effect of iron supplementation on patient-reported fatigue, using**  
11 **validated fatigue scores.** Iron supplementation was associated with a reduction in  
12 subjective measures of fatigue when assessed by either the Piper Fatigue Scale (PFS), the  
13 Current and Past Psychological State scale (CAPPS), visual analog scale or Brief Fatigue  
14 Inventory questionnaire (BFI).  
15

16  
17  
18  
19  
20  
21  
22  
23  
24  
25  
26  
27  
28  
29  
30  
31  
32  
33  
34  
35  
36  
37  
38  
39  
40  
41  
42  
43  
44  
45  
46  
47  
48  
49  
50  
51  
52  
53  
54  
55  
56  
57  
58  
59  
60

For peer review only

1  
2  
3 *Contribution:*  
4

5 Two researchers (BH and DH) lead and coordinated all aspects of the review,  
6 including but not limited to preparation of the literature search, screening relevant  
7 material, data analysis and extraction, interpretation of the results of the meta-analytic  
8 procedures, bias investigation, and preparation of the final report; three second reviewers  
9 (JG, ER, BP) conducted independent screening of relevant material, extracted and  
10 analyzed data and aided in report preparation; one hematologist/ intensivist (RZ),  
11 methodologist (DAF), and anesthetist/intensivist (AFT) with expertise in systematic  
12 reviews provided content expertise and methodological input, and resolved disagreement  
13 among reviewers; one systematic review expert (AMAS) provided methodological input;  
14 two hematologists (DSH and ER), one gastroenterologist (CB) and one statistician (RR)  
15 provided content expertise. All authors were involved in the process of study design and  
16 manuscript review.  
17  
18  
19  
20  
21  
22  
23  
24  
25  
26  
27  
28  
29  
30  
31  
32  
33  
34

35 *Competing interests:* the authors declare no competing financial interests.  
36  
37  
38  
39

40 *Funding:* funding was not obtained for completion of this study.  
41  
42  
43

44 *Data sharing:* We are submitting (in our manuscript and supplementary files) all planned  
45 data analyses.  
46  
47  
48  
49  
50  
51  
52  
53  
54  
55  
56  
57  
58  
59  
60

## References:

1. Kassebaum NJ, Jasrasaria R, Naghavi M, et al. A systematic analysis of global anemia burden from 1990 to 2010. *Blood*. 2014;123(5):615-624.
2. McLean E, Cogswell M, Egli I, Wojdyla D, de Benoist B. Worldwide prevalence of anaemia, WHO Vitamin and Mineral Nutrition Information System, 1993-2005. *Public Health Nutr*. 2009;12(4):444-454.
3. Milman N. Anemia--still a major health problem in many parts of the world! *Ann Hematol*. 2011;90(4):369-377.
4. Assessing the iron status of populations: including literature reviews: report of a Joint World Health Organization / Centers for Disease Control and Prevention Technical Consultation on the Assessment of Iron Status on the Population Level. Geneva, Switzerland; 2004:108.
5. Dallman PR. Iron deficiency: does it matter? *J Intern Med*. 1989;226(5):367-372.
6. Eichner ER. Fatigue of anemia. *Nutr Rev*. 2001;59(1 Pt 2):S17-19.
7. Florencio CA. Effects of iron and ascorbic acid supplementation on hemoglobin level and work efficiency of anemic women. *J Occup Med*. 1981;23(10):699-704.
8. Haas JD, Brownlie T. Iron deficiency and reduced work capacity: a critical review of the research to determine a causal relationship. *J Nutr*. 2001;131(2S-2):676S-688S; discussion 688S-690S.
9. Lukaski HC. Vitamin and mineral status: effects on physical performance. *Nutrition*. 2004;20(7-8):632-644.
10. Lewis G, Wessely S. The epidemiology of fatigue: more questions than answers. *J Epidemiol Community Health*. 1992;46(2):92-97.
11. Jason LA, Evans M, Brown M, Porter N. What is fatigue? Pathological and nonpathological fatigue. *PM R*. 2010;2(5):327-331.
12. Hurrie D, Graham J, Rimmer E, et al. Efficacy of iron replacement therapy on fatigue and work capacity in non-anemic adults with iron depletion: a systematic review of randomized controlled trials. PROSPERO International prospective register of systematic reviews; 2014.
13. The Cochrane Collaboration. In: J H, S G eds. *Cochrane Handbook for Systematic Reviews of Interventions*; 2009.
14. Liberati A, Altman DG, Tetzlaff J, et al. The PRISMA statement for reporting systematic reviews and meta-analyses of studies that evaluate healthcare interventions: explanation and elaboration. *BMJ*. 2009;339:b2700.
15. Higgins JP, Thompson SG. Quantifying heterogeneity in a meta-analysis. *Stat Med*. 2002;21(11):1539-1558.
16. Sterne JA, Egger M, Smith GD. Systematic reviews in health care: Investigating and dealing with publication and other biases in meta-analysis. *BMJ*. 2001;323(7304):101-105.
17. Hinton PS, Giordano C, Brownlie T, Haas JD. Iron supplementation improves endurance after training in iron-depleted, nonanemic women. *Journal of Applied Physiology*. 2000;88(3):1103-1111.
18. Leonard AJ, Chalmers KA, Collins CE, Patterson AJ. Comparison of two doses of elemental iron in the treatment of latent iron deficiency: efficacy, side effects and blinding capabilities. *Nutrients*. 2014;6(4):1394-1405.

19. Brownlie T, Utermohlen V, Hinton PS, Giordano C, Haas JD. Marginal iron deficiency without anemia impairs aerobic adaptation among previously untrained women. *Am J Clin Nutr.* 2002;75(4):734-742.
20. Brutsaert TD, Hernandez-Cordero S, Rivera J, Viola T, Hughes G, Haas JD. Iron supplementation improves progressive fatigue resistance during dynamic knee extensor exercise in iron-depleted, nonanemic women. *Am J Clin Nutr.* 2003;77(2):441-448.
21. Donangelo CM, Woodhouse LR, King SM, Viteri FE, King JC. Supplemental zinc lowers measures of iron status in young women with low iron reserves. *J Nutr.* 2002;132(7):1860-1864.
22. Hinton PS, Sinclair LM. Iron supplementation maintains ventilatory threshold and improves energetic efficiency in iron-deficient nonanemic athletes. *Eur J Clin Nutr.* 2007;61(1):30-39.
23. Klingshirn LA, Pate RR, Bourque SP, Davis JM, Sargent RG. Effect of iron supplementation on endurance capacity in iron-depleted female runners. *Med Sci Sports Exerc.* 1992;24(7):819-824.
24. Newhouse IJ, Clement DB, Taunton JE, McKenzie DC. The effects of prelatent/latent iron deficiency on physical work capacity. *Med Sci Sports Exerc.* 1989;21(3):263-268.
25. Zhu YI, Haas JD. Altered metabolic response of iron-depleted nonanemic women during a 15-km time trial. *J Appl Physiol (1985).* 1998;84(5):1768-1775.
26. LaManca JJ, Haymes EM. Effects of iron repletion on VO<sub>2</sub>max, endurance, and blood lactate in women. *Med Sci Sports Exerc.* 1993;25(12):1386-1392.
27. Burden RJ, Pollock N, Whyte GP, et al. Effect of Intravenous Iron on Aerobic Capacity and Iron Metabolism in Elite Athletes. *Med Sci Sports Exerc.* 2015;47(7):1399-1407.
28. Favrat B, Balck K, Breymann C, et al. Evaluation of a Single Dose of Ferric Carboxymaltose in Fatigued, Iron-Deficient Women - PREFER a Randomized, Placebo-Controlled Study. *PLoS One.* 2014;9(4).
29. Flink H, Tegelberg A, Thorn M, Lagerlof F. Effect of oral iron supplementation on unstimulated salivary flow rate: a randomized, double-blind, placebo-controlled trial. *J Oral Pathol Med.* 2006;35(9):540-547.
30. Fogelholm M, Jaakkola L, Lampisjärvi T. Effects of iron supplementation in female athletes with low serum ferritin concentration. *Int J Sports Med.* 1992;13(2):158-162.
31. Krayenbuehl PA, Battegay E, Breymann C, Furrer J, Schulthess G. Intravenous iron for the treatment of fatigue in nonanemic, premenopausal women with low serum ferritin concentration. *Blood.* 2011;118(12):3222-3227.
32. Vaucher P, Druais PL, Waldvogel S, Favrat B. Effect of iron supplementation on fatigue in nonanemic menstruating women with low ferritin: a randomized controlled trial. *CMAJ.* 2012;184(11):1247-1254.
33. Verdon F, Burnand B, Stubi CL, et al. Iron supplementation for unexplained fatigue in non-anaemic women: double blind randomised placebo controlled trial. *BMJ.* 2003;326(7399):1124.
34. Peeling P, Blee T, Goodman C, et al. Effect of iron injections on aerobic-exercise performance of iron-depleted female athletes. *Int J Sport Nutr Exerc Metab.* 2007;17(3):221-231.

- 1  
2  
3 35. Moafi A, Rahgozar S, Hanian M, et al. The effects of supplemental iron on  
4 educational achievements of students with "Iron deficiency without Anemia": A  
5 randomized, double-blind, placebo-controlled trial. *HealthMED*. 2012;6(6):2047-2051.  
6  
7 36. Leonard AJ, Chalmers KA, Collins CE, Patterson AJ. A study of the effects of  
8 latent iron deficiency on measures of cognition: a pilot randomised controlled trial of iron  
9 supplementation in young women. *Nutrients*. 2014;6(6):2419-2435.  
10  
11 37. Low MS, Speedy J, Styles CE, De-Regil LM, Pasricha SR. Daily iron  
12 supplementation for improving anaemia, iron status and health in menstruating women.  
13 *Cochrane Database Syst Rev*. 2016;4:CD009747.  
14  
15 38. Pratt JJ, Khan KS. Non-anaemic iron deficiency - a disease looking for  
16 recognition of diagnosis: a systematic review. *Eur J Haematol*. 2016;96(6):618-628.  
17  
18 39. Yokoi K, Konomi A. Iron deficiency without anaemia is a potential cause of  
19 fatigue: meta-analyses of randomised controlled trials and cross-sectional studies. *Br J*  
20 *Nutr*. 2017;117(10):1422-1431.  
21  
22 40. Friedmann B, Weller E, Mairbaurl H, Bartsch P. Effects of iron repletion on blood  
23 volume and performance capacity in young athletes. *Medicine and Science in Sports and*  
24 *Exercise*. 2001;33(5):741-746.  
25  
26 41. Camaschella C. Iron-deficiency anemia. *N Engl J Med*. 2015;372(19):1832-1843.  
27  
28  
29  
30  
31  
32  
33  
34  
35  
36  
37  
38  
39  
40  
41  
42  
43  
44  
45  
46  
47  
48  
49  
50  
51  
52  
53  
54  
55  
56  
57  
58  
59  
60

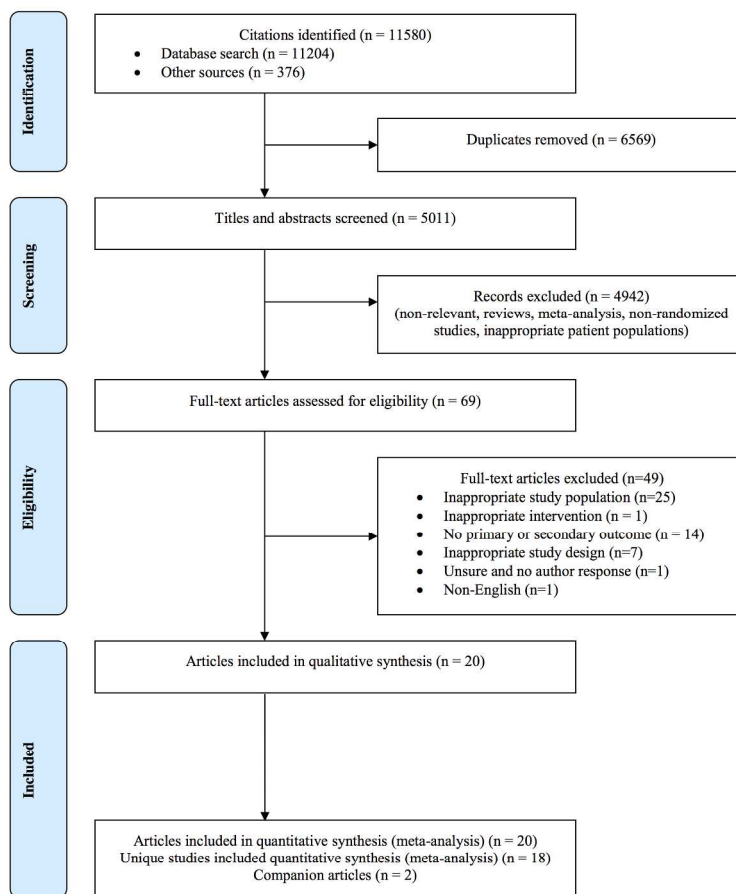

Figure 1. Study flow diagram following the Preferred Reporting Items of Systematic Reviews and Meta-Analyses (PRISMA)14 with modifications. Of the 11,580 citations identified, we included 18 unique trials and two companion papers.

215x279mm (300 x 300 DPI)



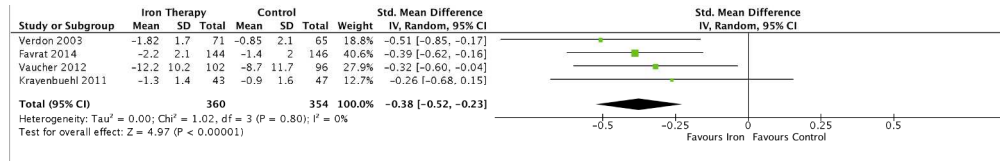

Figure 2. The effect of iron supplementation on patient-reported fatigue, using validated fatigue scores. Iron supplementation was associated with a reduction in subjective measures of fatigue when assessed by either the Piper Fatigue Scale (PFS), the Current and Past Psychological State scale (CAPPS), visual analog scale or Brief Fatigue Inventory questionnaire (BFI).

428x67mm (300 x 300 DPI)

## Appendix 1. Inclusion criteria

1. Non-anemic ( $\geq 80\%$ ): Indicated by study cutoff values, or hemoglobin concentration [Hb]  $\geq 130$  g/L (males),  $\geq 120$  g/L (females);
2. Adults ( $\geq 18$  yrs); ( $\geq 80\%$ )
3. Iron Depleted ( $\geq 80\%$ ): According to study specific definition
4. Iron therapy administered as oral / intramuscular / intravenous therapy, all therapy durations, doses and frequencies of administration will be included
5. Studies where outcomes are assessed  $\geq 28$  days from the initiation of oral iron therapy
6. Only prospective randomized trials will be considered.

## Appendix 2. Exclusion criteria

1. Studies involving animals;
2. Females who were pregnant or breastfeeding;
3. Individuals with fatigue ( $\geq 20\%$ ) identified as being the result of some other pathology (i.e. psychiatric diagnosis, thyroid, liver, rheumatic, renal, cardiovascular, pulmonary, or oncologic cause)
4. Studies involving surgical patients
5. Studies involving author identified blood donors or phlebotomy
6. Studies assessing the pharmacokinetic properties of iron compounds in healthy volunteers where the short term outcomes are expressed as the objective (<1 month)
7. Non-English studies
8. Observational study designs, quasi-randomized, cross-over, or cluster randomized trials will not be considered for this review.
9. Studies where no relevant primary or secondary outcomes of interest are reported
10. Dietary fortification studies

### Appendix 3. Search strategy

#### *Ovid Multifile (MEDLINE & Embase)*

Database: Embase <1974 to 2015 Week 47>, Ovid MEDLINE(R) In-Process & Other Non-Indexed Citations and Ovid MEDLINE(R) <1946 to Present>

Search Strategy:

-----

- 1 Iron/df (4519)
- 2 exp Ferritins/df (87)
- 3 exp Ferrous Compounds/df (1)
- 4 ((decreased or deficien\* or deplet\* or inadequa\* or insufficien\* or low or marginal) adj3 (iron or ferritin\*).tw,kw. (55943)
- 5 or/1-4 (57094)
- 6 Anemia/pc [Prevention & Control] (3144)
- 7 Anemia, Iron-Deficiency/pc [Prevention & Control] (2061)
- 8 (prevent\* adj3 (anemi\* or anaemi\* or iron deficien\*).tw,kw. (2915)
- 9 Deficiency Diseases/dt (968)
- 10 Iron/ad, tu (8860)
- 11 exp Ferritins/ad, tu (185)
- 12 exp Ferrous Compounds/ad, tu (2094)
- 13 ((ferric or ferritin\* or ferrous or iron) adj3 (administer\* or administration\* or dietary or replac\* or supplement\* or therap\* or treatment\*).tw,kw. (33100)
- 14 (iron adj3 (capsule\* or infusion\* or injection\* or intravenous\* or IV or parenteral\* or pill or pills or medication\* or tablet\*).tw,kw. (10147)
- 15 Iron/ and Dietary Supplements/ (4252)
- 16 (ferrous sulfate or ferrous sulphate or aktiferrin or apo-ferrous sulfate or auryxia or bifera or biofer or ceferro or conferon or eisendragees-ratiopharm or eisensulfat stada or elite iron or femiron or feosol or feospan or fer-gen-sol or fer-in-sol or feratab or fergon or ferodan or fero-gradumet or ferro-gradumet or ferogradumet or ferrex 150 or ferrogamma or ferrogad or haemoprotect or hemobion or hemofer or hamatopan or haematopan or kendural or "Mol-Iron" or plastufer or "Slow-Fe" or vitaferro kapseln).tw,kw. (4979)
- 17 (ferrous fumarate or feostat or ferrocop or fersaday or fersamal or ferval or fumar or galfer or ircon or nephro-fer or palafer or rulofer).tw,kw. (510)
- 18 (ferrous gluconate or apo-ferrous gluconate or dextriferron or eisen-sandoz or "FeG Iron" or ferroglucon or ferrogluconaat or ferrum verla or loesferron or losferron or simron or vitaferro brause).tw,kw. (226)
- 19 or/6-18 (55320)
- 20 5 and 19 (17537)
- 21 (controlled clinical trial or randomized controlled trial).pt. (504747)
- 22 clinical trials as topic.sh. (180086)
- 23 (randomi#ed or randomly or RCT\$1 or placebo\*).tw. (1644668)
- 24 ((singl\* or doubl\* or trebl\* or tripl\*) adj (mask\* or blind\* or dumm\*).tw. (324774)
- 25 trial.ti. (344352)
- 26 or/21-25 (2079234)
- 27 20 and 26 (2880)
- 28 exp Animals/ not (exp Animals/ and Humans/) (9776432)
- 29 27 not 28 (2641)
- 30 (comment or editorial or interview or news).pt. (1640361)
- 31 (letter not (letter and randomized controlled trial)).pt. (1871051)
- 32 29 not (30 or 31) (2636)
- 33 32 use prmz (1373)

34 iron deficiency/ (11754)  
 35 iron deficiency anemia/ (28987)  
 36 ((decreased or deficien\* or deplet\* or inadequa\* or insufficien\* or low or marginal) adj3  
 37 (iron or ferritin\*).tw,kw. (55943)  
 38 or/34-36 (71135)  
 39 anemia/pc [Prevention] (3144)  
 40 iron deficiency anemia/pc [Prevention] (2269)  
 41 (prevent\* adj3 (anemi\* or anaemi\* or iron deficien\*).tw,kw. (2915)  
 42 iron deficiency/dt [Drug Therapy] (1631)  
 43 iron therapy/ (5814)  
 44 iron/ad, dt, th [Drug Administration, Drug Therapy, Therapy] (13258)  
 45 ferritin/ad, dt [Drug Administration, Drug Therapy] (211)  
 46 ferrous ion/ad, dt [Drug Administration, Drug Therapy] (413)  
 47 ((ferric or ferritin\* or ferrous or iron) adj3 (administer\* or administration\* or dietary or  
 48 replac\* or supplement\* or therap\* or treatment\*).tw,kw. (33100)  
 49 (iron adj3 (capsule\* or infusion\* or injection\* or intravenous\* or IV or parenteral\* or pill or  
 50 pills or medication\* or tablet\*).tw,kw. (10147)  
 51 iron/ and diet supplementation/ (3538)  
 52 ferrous sulfate/ (6637)  
 53 (ferrous sulfate or ferrous sulphate or aktiferrin or apo-ferrous sulfate or auryxia or bifera or  
 54 biofer or ceferro or conferon or eisendragees-ratiopharm or eisensulfat stada or elite iron or  
 55 femiron or feosol or feospan or fer-gen-sol or fer-in-sol or feratab or fergon or ferodan or fero-  
 56 gradumet or ferro-gradumet or ferogradumet or ferrex 150 or ferrogamma or ferrogad or  
 57 haemoprotect or hemobion or hemofer or hamatopan or haematopan or kendural or "Mol-Iron" or  
 58 plastufer or "Slow-Fe" or vitaferro kapseln).tw,kw. (4979)  
 59 ferrous fumarate/ (831)  
 60 (ferrous fumarate or feostat or ferrocap or fersaday or fersamal or ferval or fumar or galfer  
 61 or ircon or nephro-fer or palafer or rulofer).tw,kw. (510)  
 62 ferrous gluconate/ (1490)  
 63 (ferrous gluconate or apo-ferrous gluconate or dextriferron or eisen-sandoz or "FeG Iron" or  
 64 ferroglucon or ferrogluconaat or ferrum verla or loesferron or losferron or simron or vitaferro  
 65 brause).tw,kw. (226)  
 66 or/38-54 (62415)  
 67 37 and 55 (22461)  
 68 randomized controlled trial/ or controlled clinical trial/ (1035658)  
 69 exp "clinical trial (topic)"/ (172053)  
 70 (randomi#ed or randomly or RCT\$1 or placebo\*).tw. (1644668)  
 71 ((singl\* or doubl\* or trebl\* or tripl\*) adj (mask\* or blind\* or dumm\*).tw. (324774)  
 72 trial.ti. (344352)  
 73 or/57-61 (2260510)  
 74 56 and 62 (3652)  
 75 exp animal experimentation/ or exp models animal/ or exp animal experiment/ or  
 76 nonhuman/ or exp vertebrate/ (40209729)  
 77 exp humans/ or exp human experimentation/ or exp human experiment/ (31154163)  
 78 64 not 65 (9057215)  
 79 63 not 66 (3517)  
 80 editorial.pt. (898431)  
 81 letter.pt. not (letter.pt. and randomized controlled trial/) (1866594)  
 82 67 not (68 or 69) (3492)  
 83 70 use oemez (2075)  
 84 33 or 71 (3448)

1  
2  
3  
4  
5  
6  
7  
8  
9  
10  
11  
12  
13  
14  
15  
16  
17  
18  
19  
20  
21  
22  
23  
24  
25  
26  
27  
28  
29  
30  
31  
32  
33  
34  
35  
36  
37  
38  
39  
40  
41  
42  
43  
44  
45  
46  
47  
48  
49  
50  
51  
52  
53  
54  
55  
56  
57  
58  
59  
60

- 73 remove duplicates from 72 (2408) [TOTAL UNIQUE RECORDS]
- 74 73 use prmz (1319) [MEDLINE UNIQUE RECORDS]
- 75 73 use oemez (1089) [EMBASE UNIQUE RECORDS]

For peer review only

## Appendix 4. The effect of iron supplementation on measures of physical capacity

### 4A. 15 km time trial

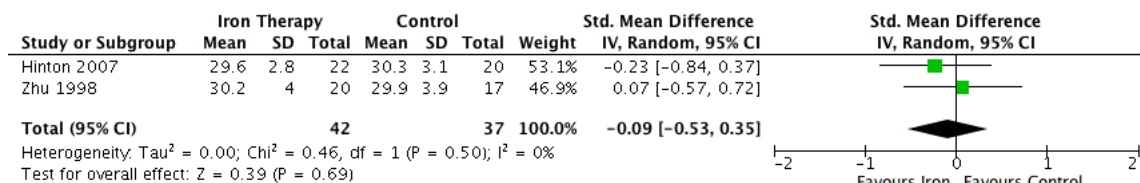

### 4B. Time to exhaustion

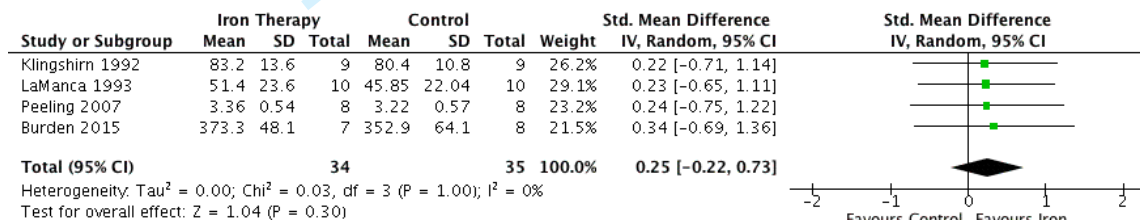

### 4C. Oxygen consumption (VO<sub>2</sub> max)

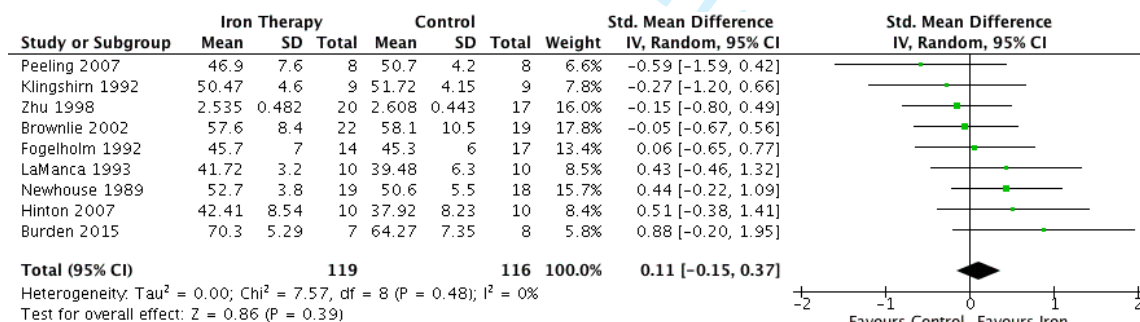

Appendix 5. Funnel plot of studies which captured VO<sub>2</sub> max

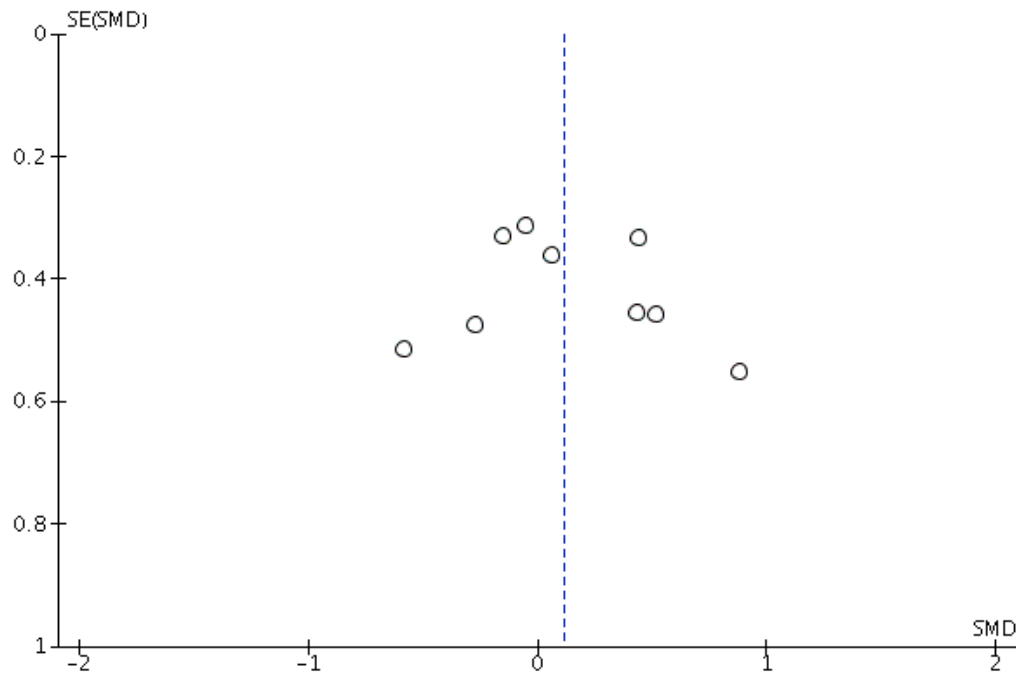

view only



### Appendix 6. Physical capacity tests investigated among the trials reporting measures of physical capacity

| Study                    | Population details                 | Work capacity tests                                                                                    | Intervention outcomes                                                                                                                                                                                                                                                     |
|--------------------------|------------------------------------|--------------------------------------------------------------------------------------------------------|---------------------------------------------------------------------------------------------------------------------------------------------------------------------------------------------------------------------------------------------------------------------------|
| Brownlie <sup>19</sup>   | Physically active untrained women  | VO <sub>2</sub> max<br>RER, HRmax<br>15km time trial<br>TT RER, TT<br>VO <sub>2</sub> max, TT lactates | Significant increases in VO <sub>2</sub> max and decreases in RER in iron treated group compared to placebo; no difference in HRmax<br>Significant reduction in TT in iron group compared to placebo; no differences between TT RER, TT %VO <sub>2</sub> max, TT lactates |
| Brutsaert <sup>20</sup>  | Untrained women                    | Dynamic knee extension to fatigue                                                                      | Significant reduction in MVC decline in iron group compared to placebo                                                                                                                                                                                                    |
| Burden <sup>27</sup>     | University endurance runners       | VO <sub>2</sub><br>Time to exhaustion<br>RPE                                                           | No significant difference in VO <sub>2</sub> max, time to exhaustion or RPE in iron group compared to placebo.                                                                                                                                                            |
| Fogelholm <sup>30</sup>  | Female athletes                    | VO <sub>2</sub> max<br>Lactate levels                                                                  | No significant difference in VO <sub>2</sub> max and lactate levels between iron and placebo group                                                                                                                                                                        |
| Hinton <sup>22</sup>     | Recreationally trained individuals | VO <sub>2</sub> max<br>Submaximal test<br>Ventilatory threshold                                        | Significant improvements in gross energetic efficiency and VT among iron groups compared to placebo; no significant difference in VO <sub>2</sub> max between groups                                                                                                      |
| Klingshirn <sup>23</sup> | Female endurance runners           | VO <sub>2</sub> max<br>Time to exhaustion<br>Lactate threshold                                         | No significant differences in all measures between iron group and placebo                                                                                                                                                                                                 |
| LaManca <sup>26</sup>    | Healthy females                    | VO <sub>2</sub> max<br>Time to exhaustion<br>RER, HR, lactate                                          | Significant increases in VO <sub>2</sub> max in iron group compared to placebo; no difference in time to exhaustion, RER, HR or lactate.                                                                                                                                  |
| Newhouse <sup>24</sup>   | Young women                        | VO <sub>2</sub> max<br>Wingate anaerobic test<br>Anaerobic speed test                                  | No significant differences were observed between iron group and placebo                                                                                                                                                                                                   |

1  
2  
3  
4  
5  
6  
7  
8  
9  
10  
11  
12  
13  
14  
15  
16  
17  
18  
19  
20  
21  
22  
23  
24  
25  
26  
27  
28  
29  
30  
31  
32  
33  
34  
35  
36  
37  
38  
39  
40  
41  
42  
43  
44  
45  
46  
47

|                       |                                    |                                                                         |                                                                            |
|-----------------------|------------------------------------|-------------------------------------------------------------------------|----------------------------------------------------------------------------|
|                       |                                    | Ventilatory threshold<br>Muscle enzyme<br>assessments                   |                                                                            |
| Peeling <sup>34</sup> | Well-trained<br>female<br>athletes | VO <sub>2</sub> max<br>Submaximal economy<br>test<br>Time to exhaustion | No significant differences were observed between iron and placebo<br>group |
| Zhu <sup>25</sup>     | Physically<br>active women         | VO <sub>2</sub> max<br>15km time trial<br>TT lactates                   | No significant differences were observed between iron and placebo<br>group |

RER = respiratory exchange ratio; HRmax = maximum heart rate; km = kilometer; TT = time trial; RPE = rated perceived exertion;  
MVC = maximum ventilator capacity

### Appendix 7. Subgroup analysis for fatigue

| Subgroup                             | Studies          | Participants (iron) | Participants (control) | Effect estimate (95% CI) | I <sup>2</sup> Value | Across Subgroups                |
|--------------------------------------|------------------|---------------------|------------------------|--------------------------|----------------------|---------------------------------|
| <b>Method of iron administration</b> |                  |                     |                        |                          |                      |                                 |
| Oral                                 | <sup>32,33</sup> | 173                 | 161                    | SMD -0.39 (-0.61, -0.18) | 0%                   | p = 0.82<br>I <sup>2</sup> = 0% |
| Intravenous                          | <sup>28,31</sup> | 187                 | 193                    | SMD -0.36 (-0.56, -0.16) | 0%                   |                                 |
| <b>Duration of study follow-up</b>   |                  |                     |                        |                          |                      |                                 |
| <2 months                            | <sup>28,33</sup> | 215                 | 211                    | SMD -0.43 (-0.62, -0.23) | 0%                   | p = 0.41<br>I <sup>2</sup> = 0% |
| >2 months                            | <sup>31,32</sup> | 145                 | 143                    | SMD -0.30 (-0.53, -0.07) | 0%                   |                                 |

Biologic sex, athletic status (athlete vs. non-athlete) and risk of bias subgroup analyses were unevaluable in subgroup analyses as all participants were females, of uncategorized athletic status. All trials were of unclear risk of bias. CI = confidence interval; SMD = standardized mean difference

1  
2  
3  
4  
5  
6  
7  
8  
9  
10  
11  
12  
13  
14  
15  
16  
17  
18  
19  
20  
21  
22  
23  
24  
25  
26  
27  
28  
29  
30  
31  
32  
33  
34  
35  
36  
37  
38  
39  
40  
41  
42  
43  
44  
45  
46  
47

**Appendix 8. Subgroup analysis for physical capacity**

| Subgroup                             | Studies           | Participants (iron) | Participants (control) | Effect estimate (95% CI) | I <sup>2</sup> Value | Across Subgroups                 |
|--------------------------------------|-------------------|---------------------|------------------------|--------------------------|----------------------|----------------------------------|
| <b>Population</b>                    |                   |                     |                        |                          |                      |                                  |
| Athlete                              | 22-24,26,27,30,34 | 77                  | 80                     | SMD 0.22 (-0.10, 0.55)   | 3%                   | p = 0.25<br>I <sup>2</sup> = 24% |
| Non-athlete                          | 19,25             | 42                  | 36                     | SMD -0.10 (-0.55, 0.35)  | 0%                   |                                  |
| <b>Method of iron administration</b> |                   |                     |                        |                          |                      |                                  |
| Oral                                 | 19,22-26,30       | 104                 | 100                    | SMD 0.12 (-0.16, -0.39)  | 0%                   | p = 0.15<br>I <sup>2</sup> = 47% |
| IV                                   | 27                | 7                   | 8                      | SMD 0.88 (-0.20, 1.95)   | NA                   |                                  |
| IM                                   | 34                | 8                   | 8                      | SMD -0.59 (-1.59, 0.42)  | NA                   |                                  |

Biologic sex, duration of follow-up and risk of bias subgroup analyses were unevaluable in subgroup analyses as all trials enrolled females and had a follow-up period of less than two months. All trials were of unclear risk of bias. CI = confidence interval; SMD = standardized mean difference; IV = intravenous; IM = intramuscular

Peer Review only

**Appendix 9. Effect of iron supplementation on serum hemoglobin**

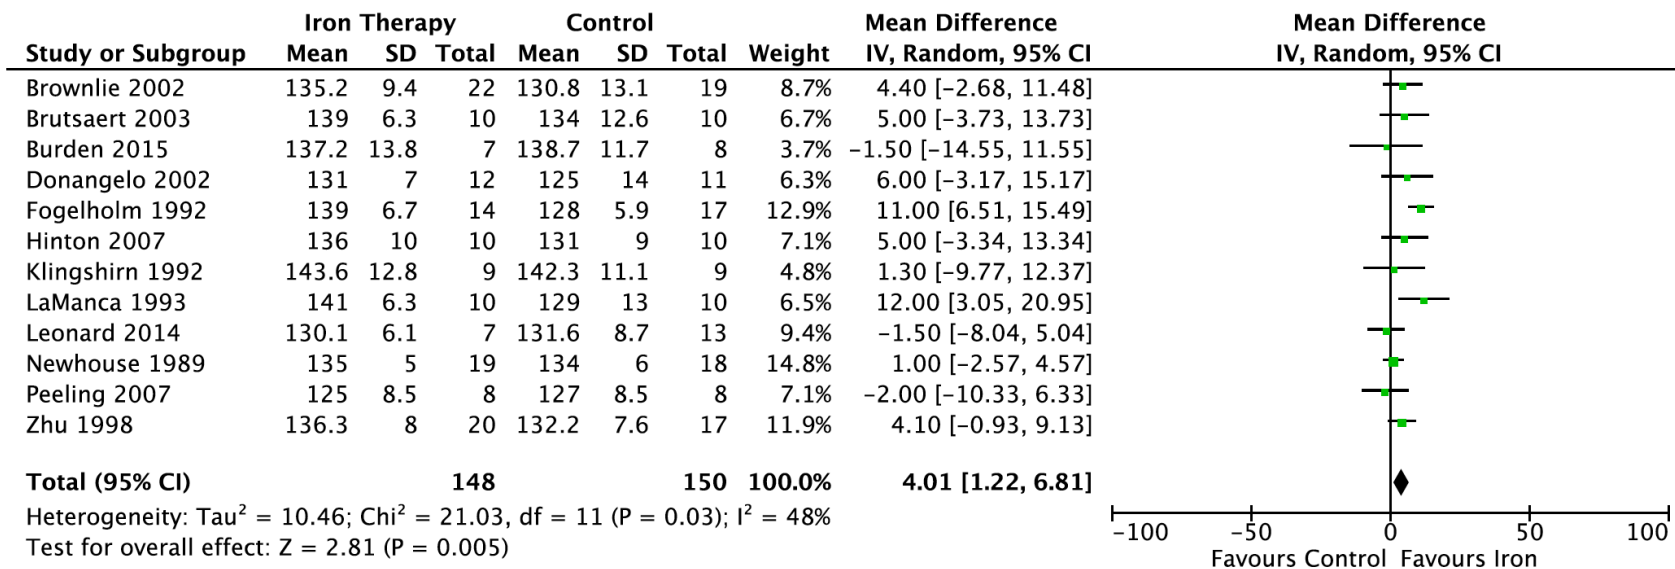

1  
2  
3  
4  
5  
6  
7  
8  
9  
10  
11  
12  
13  
14  
15  
16  
17  
18  
19  
20  
21  
22  
23  
24  
25  
26  
27  
28  
29  
30  
31  
32  
33  
34  
35  
36  
37  
38  
39  
40  
41  
42  
43  
44  
45  
46  
47

### Appendix 10. Effect of iron supplementation on serum ferritin

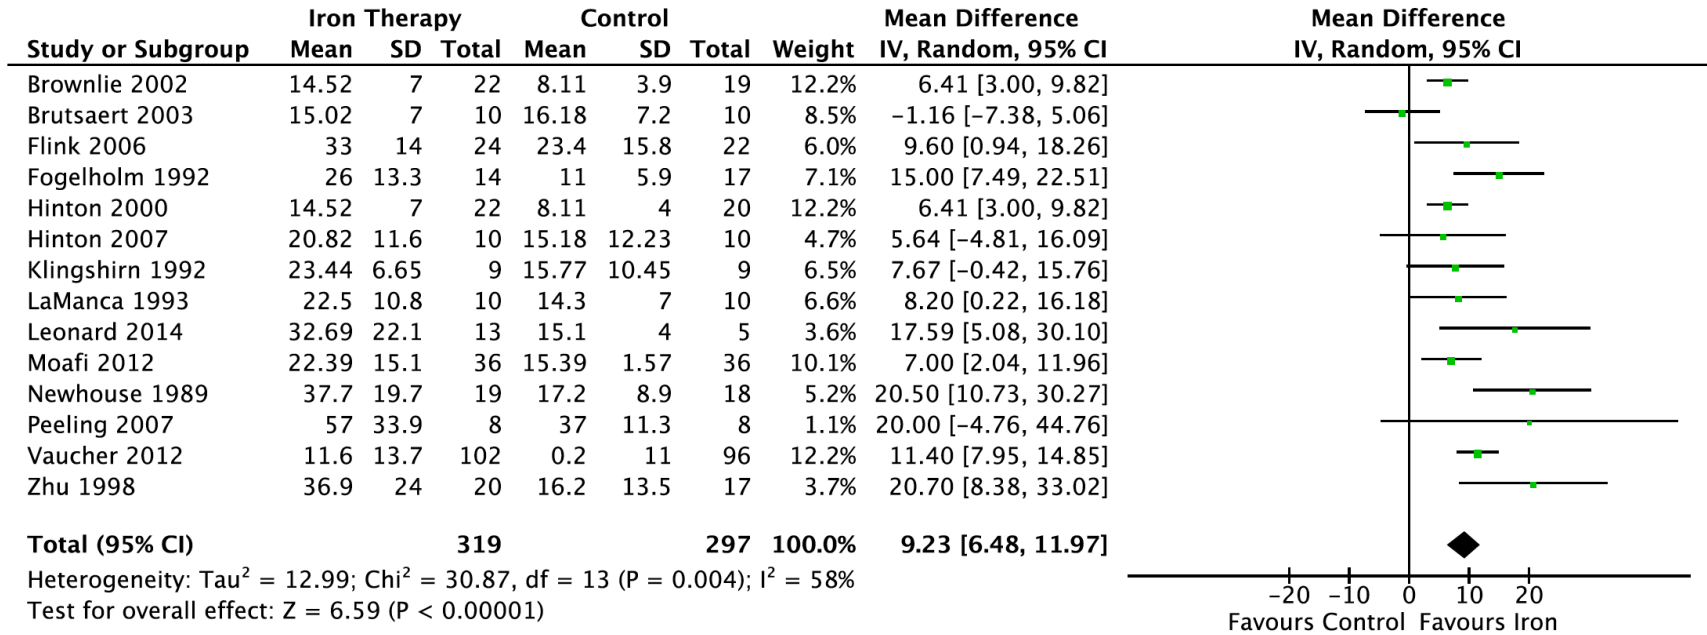

**Appendix 11. Adverse effects in trials of iron supplementation in iron-deficient, non-anemic individuals**

| Study                     | Constipation                                                                                                                                                               | Diarrhea            | Nausea              | GI intolerance        |
|---------------------------|----------------------------------------------------------------------------------------------------------------------------------------------------------------------------|---------------------|---------------------|-----------------------|
| <b>Intravenous</b>        |                                                                                                                                                                            |                     |                     |                       |
| Burden <sup>27</sup>      | NR                                                                                                                                                                         | NR                  | NR                  | NR                    |
| Favrat <sup>28</sup>      | NR                                                                                                                                                                         | NR                  | Iron: 8; Control: 2 | NR                    |
| Krayenbuehl <sup>31</sup> | NR                                                                                                                                                                         | Iron: 0; Control: 1 | Iron: 6; Control: 1 | NR                    |
| <b>Intramuscular</b>      |                                                                                                                                                                            |                     |                     |                       |
| Flink <sup>29</sup>       | NR                                                                                                                                                                         | NR                  | NR                  | Iron: 14; Control: 2  |
| <b>Oral</b>               |                                                                                                                                                                            |                     |                     |                       |
| Brownlie <sup>19</sup>    | NR                                                                                                                                                                         | NR                  | NR                  | NR                    |
| Brutsaert <sup>20</sup>   | “Frequency and severity of reported side effects due to supplementation was very low and did not differ significantly between groups”                                      |                     |                     |                       |
| Donangelo <sup>21</sup>   | NR                                                                                                                                                                         | NR                  | NR                  | NR                    |
| Fogelholm <sup>30</sup>   | NR                                                                                                                                                                         | NR                  | NR                  | NR                    |
| Hinton <sup>22</sup>      | NR                                                                                                                                                                         | NR                  | NR                  | NR                    |
| Klingshirn <sup>23</sup>  | NR                                                                                                                                                                         | NR                  | NR                  | Iron: 1; Control: 0   |
| LaManca <sup>26</sup>     | NR                                                                                                                                                                         | NR                  | NR                  | NR                    |
| Leonard <sup>18</sup>     | Iron: 1; Control: 0                                                                                                                                                        | Iron: 2; Control: 2 | Iron: 2; Control: 1 | NR                    |
| Moafi <sup>35</sup>       | “When symptoms occurring immediately before or during menses were excluded, there were no significant differences either in frequency or severity of symptoms experienced” |                     |                     |                       |
| Newhouse <sup>24</sup>    | NR                                                                                                                                                                         | NR                  | NR                  | NR                    |
| Peeling <sup>34</sup>     | NR                                                                                                                                                                         | NR                  | NR                  | NR                    |
| Vaucher <sup>32</sup>     | NR                                                                                                                                                                         | NR                  | NR                  | Iron: 12; Control: 10 |
| Verdon <sup>33</sup>      | NR                                                                                                                                                                         | NR                  | Iron: 0; control: 1 | NR                    |
| Zhu <sup>25</sup>         | NR                                                                                                                                                                         | NR                  | NR                  | NR                    |

NR, not reported; GI, gastrointestinal

## Appendix 12. Compliance with the study intervention

|                           | Iron (%) | Control (%) |
|---------------------------|----------|-------------|
| <b>Intravenous</b>        |          |             |
| Burden <sup>27</sup>      | 100      | 100         |
| Favrat <sup>28</sup>      | 100      | 100         |
| Krayenbuehl <sup>31</sup> | NR       | NR          |
| <b>Intramuscular</b>      |          |             |
| Peeling <sup>34</sup>     | NR       | NR          |
| <b>Oral</b>               |          |             |
| Brownlie <sup>19</sup>    | 91       | 89          |
| Brutsaert <sup>20</sup>   | NR       | NR          |
| Donangelo <sup>21</sup>   | NR       | NR          |
| Flink <sup>29</sup>       | 71       | 82          |
| Fogelholm <sup>30</sup>   | NR       | NR          |
| Hinton <sup>22</sup>      | 98       | 99          |
| Klingshirn <sup>23</sup>  | 89       | 91          |
| LaManca <sup>26</sup>     | 82       | 85          |
| Leonard <sup>18*</sup>    | 89       | 92          |
| Moafi <sup>35</sup>       | 89       | 92          |
| Newhouse <sup>24</sup>    | >75      | >75         |
| Vaucher <sup>32</sup>     | 93       | 94          |
| Verdon <sup>33</sup>      | 95       | 98          |
| Zhu <sup>25</sup>         | 88       | 87          |

\*weighted averaged between two iron treatment groups; NR = not reported



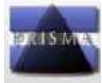

# PRISMA 2009 Checklist

| Section/topic                      | #  | Checklist item                                                                                                                                                                                                                                                                                              | Reported on page # |
|------------------------------------|----|-------------------------------------------------------------------------------------------------------------------------------------------------------------------------------------------------------------------------------------------------------------------------------------------------------------|--------------------|
| <b>TITLE</b>                       |    |                                                                                                                                                                                                                                                                                                             |                    |
| Title                              | 1  | Identify the report as a systematic review, meta-analysis, or both.                                                                                                                                                                                                                                         | 1                  |
| <b>ABSTRACT</b>                    |    |                                                                                                                                                                                                                                                                                                             |                    |
| Structured summary                 | 2  | Provide a structured summary including, as applicable: background; objectives; data sources; study eligibility criteria, participants, and interventions; study appraisal and synthesis methods; results; limitations; conclusions and implications of key findings; systematic review registration number. | 2                  |
| <b>INTRODUCTION</b>                |    |                                                                                                                                                                                                                                                                                                             |                    |
| Rationale                          | 3  | Describe the rationale for the review in the context of what is already known.                                                                                                                                                                                                                              | 4                  |
| Objectives                         | 4  | Provide an explicit statement of questions being addressed with reference to participants, interventions, comparisons, outcomes, and study design (PICOS).                                                                                                                                                  | 6                  |
| <b>METHODS</b>                     |    |                                                                                                                                                                                                                                                                                                             |                    |
| Protocol and registration          | 5  | Indicate if a review protocol exists, if and where it can be accessed (e.g., Web address), and, if available, provide registration information including registration number.                                                                                                                               | 5                  |
| Eligibility criteria               | 6  | Specify study characteristics (e.g., PICOS, length of follow-up) and report characteristics (e.g., years considered, language, publication status) used as criteria for eligibility, giving rationale.                                                                                                      | 6                  |
| Information sources                | 7  | Describe all information sources (e.g., databases with dates of coverage, contact with study authors to identify additional studies) in the search and date last searched.                                                                                                                                  | 6                  |
| Search                             | 8  | Present full electronic search strategy for at least one database, including any limits used, such that it could be repeated.                                                                                                                                                                               | Supp 3             |
| Study selection                    | 9  | State the process for selecting studies (i.e., screening, eligibility, included in systematic review, and, if applicable, included in the meta-analysis).                                                                                                                                                   | 7                  |
| Data collection process            | 10 | Describe method of data extraction from reports (e.g., piloted forms, independently, in duplicate) and any processes for obtaining and confirming data from investigators.                                                                                                                                  | 7                  |
| Data items                         | 11 | List and define all variables for which data were sought (e.g., PICOS, funding sources) and any assumptions and simplifications made.                                                                                                                                                                       | 6                  |
| Risk of bias in individual studies | 12 | Describe methods used for assessing risk of bias of individual studies (including specification of whether this was done at the study or outcome level), and how this information is to be used in any data synthesis.                                                                                      | 7                  |
| Summary measures                   | 13 | State the principal summary measures (e.g., risk ratio, difference in means).                                                                                                                                                                                                                               | 8                  |
| Synthesis of results               | 14 | Describe the methods of handling data and combining results of studies, if done, including measures of consistency (e.g., $I^2$ ) for each meta-analysis.                                                                                                                                                   | 8                  |

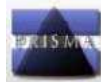

# PRISMA 2009 Checklist

Page 1 of 2

| Section/topic                 | #  | Checklist item                                                                                                                                                                                           | Reported on page # |
|-------------------------------|----|----------------------------------------------------------------------------------------------------------------------------------------------------------------------------------------------------------|--------------------|
| Risk of bias across studies   | 15 | Specify any assessment of risk of bias that may affect the cumulative evidence (e.g., publication bias, selective reporting within studies).                                                             | 7                  |
| Additional analyses           | 16 | Describe methods of additional analyses (e.g., sensitivity or subgroup analyses, meta-regression), if done, indicating which were pre-specified.                                                         | 8                  |
| <b>RESULTS</b>                |    |                                                                                                                                                                                                          |                    |
| Study selection               | 17 | Give numbers of studies screened, assessed for eligibility, and included in the review, with reasons for exclusions at each stage, ideally with a flow diagram.                                          | 9, Fig 1           |
| Study characteristics         | 18 | For each study, present characteristics for which data were extracted (e.g., study size, PICOS, follow-up period) and provide the citations.                                                             | 9                  |
| Risk of bias within studies   | 19 | Present data on risk of bias of each study and, if available, any outcome level assessment (see item 12).                                                                                                | 9                  |
| Results of individual studies | 20 | For all outcomes considered (benefits or harms), present, for each study: (a) simple summary data for each intervention group (b) effect estimates and confidence intervals, ideally with a forest plot. | 9, Fig 2           |
| Synthesis of results          | 21 | Present results of each meta-analysis done, including confidence intervals and measures of consistency.                                                                                                  | 10                 |
| Risk of bias across studies   | 22 | Present results of any assessment of risk of bias across studies (see Item 15).                                                                                                                          | 10, 11             |
| Additional analysis           | 23 | Give results of additional analyses, if done (e.g., sensitivity or subgroup analyses, meta-regression [see Item 16]).                                                                                    | 12                 |
| <b>DISCUSSION</b>             |    |                                                                                                                                                                                                          |                    |
| Summary of evidence           | 24 | Summarize the main findings including the strength of evidence for each main outcome; consider their relevance to key groups (e.g., healthcare providers, users, and policy makers).                     | 13                 |
| Limitations                   | 25 | Discuss limitations at study and outcome level (e.g., risk of bias), and at review-level (e.g., incomplete retrieval of identified research, reporting bias).                                            | 14                 |
| Conclusions                   | 26 | Provide a general interpretation of the results in the context of other evidence, and implications for future research.                                                                                  | 15                 |
| <b>FUNDING</b>                |    |                                                                                                                                                                                                          |                    |
| Funding                       | 27 | Describe sources of funding for the systematic review and other support (e.g., supply of data); role of funders for the systematic review.                                                               | 16                 |

From: Moher D, Liberati A, Tetzlaff J, Altman DG, The PRISMA Group (2009). Preferred Reporting Items for Systematic Reviews and Meta-Analyses: The PRISMA Statement. PLoS Med 6(6): e1000097. doi:10.1371/journal.pmed1000097

For more information, visit: [www.prisma-statement.org](http://www.prisma-statement.org).

Page 2 of 2

For peer review only - <http://bmjopen.bmj.com/site/about/guidelines.xhtml>

# BMJ Open

## Efficacy of iron supplementation on fatigue and physical capacity in non-anemic iron deficient adults: a systematic review of randomized controlled trials

|                                 |                                                                                                                                                                                                                                                                                                                                                                                                                                                                                                                                                                                                                                                                                                                                                                                                                                                                                                                                                                                                                                                                                                                                                                                              |
|---------------------------------|----------------------------------------------------------------------------------------------------------------------------------------------------------------------------------------------------------------------------------------------------------------------------------------------------------------------------------------------------------------------------------------------------------------------------------------------------------------------------------------------------------------------------------------------------------------------------------------------------------------------------------------------------------------------------------------------------------------------------------------------------------------------------------------------------------------------------------------------------------------------------------------------------------------------------------------------------------------------------------------------------------------------------------------------------------------------------------------------------------------------------------------------------------------------------------------------|
| Journal:                        | <i>BMJ Open</i>                                                                                                                                                                                                                                                                                                                                                                                                                                                                                                                                                                                                                                                                                                                                                                                                                                                                                                                                                                                                                                                                                                                                                                              |
| Manuscript ID                   | bmjopen-2017-019240.R2                                                                                                                                                                                                                                                                                                                                                                                                                                                                                                                                                                                                                                                                                                                                                                                                                                                                                                                                                                                                                                                                                                                                                                       |
| Article Type:                   | Research                                                                                                                                                                                                                                                                                                                                                                                                                                                                                                                                                                                                                                                                                                                                                                                                                                                                                                                                                                                                                                                                                                                                                                                     |
| Date Submitted by the Author:   | 01-Feb-2018                                                                                                                                                                                                                                                                                                                                                                                                                                                                                                                                                                                                                                                                                                                                                                                                                                                                                                                                                                                                                                                                                                                                                                                  |
| Complete List of Authors:       | Houston, Brett; University of Manitoba / CancerCare Manitoba, Hematology and Medical Oncology<br>Hurrie, Daryl; University of Manitoba<br>Graham, Jeff; University of Manitoba / CancerCare Manitoba, Hematology and Medical Oncology<br>Perija, Brittany; University of Manitoba, Department of Internal Medicine<br>Rimmer, Emily; University of Manitoba / CancerCare Manitoba, Hematology and Medical Oncology<br>Rabbani, Rasheda; University of Manitoba and George & Fay Yee Center for Healthcare Innovation<br>Bernstein, Charles; University of Manitoba, Gastroenterology<br>Turgeon, Alexis; Centre de Recherche du Centre Hospitalier Affilié Universitaire de Québec (CHA), Axe Traumatologie-urgence-soins intensifs, CHA-Hôpital de l'Enfant-Jésus, Université Laval, Anesthesia and Critical Care Medicine<br>Fergusson, Dean; Ottawa Hospital Research Institute<br>Houston, Donald; University of Manitoba / CancerCare Manitoba, Hematology and Medical Oncology<br>Abou-Setta, Ahmed; University of Manitoba and George & Fay Yee Center for Healthcare Innovation<br>Zarychanski, Ryan ; University of Manitoba / CancerCare Manitoba, Hematology and Medical Oncology |
| <b>Primary Subject Heading</b>: | Evidence based practice                                                                                                                                                                                                                                                                                                                                                                                                                                                                                                                                                                                                                                                                                                                                                                                                                                                                                                                                                                                                                                                                                                                                                                      |
| Secondary Subject Heading:      | Epidemiology, General practice / Family practice, Haematology (incl blood transfusion), Pharmacology and therapeutics, Global health                                                                                                                                                                                                                                                                                                                                                                                                                                                                                                                                                                                                                                                                                                                                                                                                                                                                                                                                                                                                                                                         |
| Keywords:                       | Iron deficiency, Iron supplementation, Fatigue, Exercise capacity, Systematic review                                                                                                                                                                                                                                                                                                                                                                                                                                                                                                                                                                                                                                                                                                                                                                                                                                                                                                                                                                                                                                                                                                         |
|                                 |                                                                                                                                                                                                                                                                                                                                                                                                                                                                                                                                                                                                                                                                                                                                                                                                                                                                                                                                                                                                                                                                                                                                                                                              |

SCHOLARONE™  
Manuscripts

# Efficacy of iron supplementation on fatigue and physical capacity in non-anemic iron deficient adults: a systematic review of randomized controlled trials

Brett L. Houston<sup>1,2</sup>, Daryl Hurrie<sup>3</sup>, Jeff Graham<sup>1,2</sup>, Brittany Perija<sup>4</sup>, Emily Rimmer<sup>1,2</sup>,  
Rasheda Rabbani<sup>5,6</sup>, Charles N. Bernstein<sup>7</sup>, Alexis Turgeon<sup>8</sup>, Dean Fergusson<sup>9</sup>, Donald S.  
Houston<sup>1,2</sup>, Ahmed M. Abou-Setta<sup>5,6</sup>, Ryan Zarychanski<sup>1,2,5,6</sup>

<sup>1</sup>Department of Internal Medicine, Section of Medical Oncology and Haematology,  
University of Manitoba, Winnipeg, Manitoba, Canada

<sup>2</sup>Department of Medical Oncology and Haematology, CancerCare Manitoba, Winnipeg,  
Manitoba, Canada

<sup>3</sup>Applied Health Sciences, Faculty of Kinesiology and Recreation Management,  
University of Manitoba, Winnipeg, Manitoba, Canada

<sup>4</sup>Department of Internal Medicine, Faculty of Medicine, University of Manitoba,  
Winnipeg, Manitoba, Canada

<sup>5</sup>George & Fay Yee Center for Healthcare Innovation, University of Manitoba/Winnipeg  
Regional Health Authority, Winnipeg, Manitoba, Canada

<sup>6</sup>Department of Community Health Sciences, University of Manitoba, Winnipeg,  
Manitoba, Canada

<sup>7</sup>Department of Internal Medicine, Section of Gastroenterology, University of Manitoba,  
Winnipeg, Manitoba, Canada

<sup>8</sup>Centre de recherche du CHU de Québec – Université Laval, Population Health and  
Optimal Health Practices Research Unit, Trauma - Emergency - Critical Care Medicine;  
Department of Anesthesiology and Critical Care Medicine, Division of Critical Care  
Medicine, Faculty of Medicine, Université Laval, Québec City, Québec, Canada.

<sup>9</sup>Clinical Epidemiology Program, Ottawa Hospital Research Institute (OHRI);  
Department of Medicine, University of Ottawa, Ottawa, Ontario, Canada

Corresponding author: Ryan Zarychanski  
ON 2051-675 McDermot Avenue  
CancerCare Manitoba  
Winnipeg, Manitoba, R3E OV9  
T: 204-787-2108  
F: 204-786-0196  
rzarychanski@cancercare.mb.ca

Short title: Iron therapy and fatigue

Document data: Abstract: 335 words; Text: 2832 words; Figures: 3; Tables: 2;  
Appendices: 11; References: 41

Systematic Review Registration: PROSPERO (CRD42014007085)

1  
2  
3 OBJECTIVE: Iron supplementation in iron deficiency anemia is standard practice, but  
4  
5 the benefits of iron supplementation in iron deficient non-anemic (IDNA) individuals  
6  
7 remains controversial. Our objective is to identify the effects of iron therapy on fatigue  
8  
9 and physical capacity in iron deficient non-anemic adults.  
10  
11

12 DESIGN: Systematic review and meta-analysis of randomized controlled trials (RCTs)  
13

14 SETTING: Primary care  
15

16 PARTICIPANTS: Adults ( $\geq 18$  years) who were iron deficient but non-anemic  
17  
18

19 INTERVENTIONS: Oral, intramuscular or intravenous iron supplementation; all therapy  
20  
21 doses, frequencies and durations were included  
22  
23

24 COMPARATORS: Placebo or active therapy  
25

26 RESULTS: We identified RCTs in Medline, Embase, CENTRAL, CINAHL,  
27  
28 SportDiscus, and CAB Abstracts from inception to October 31, 2016. We searched the  
29  
30 World Health Organization's ICTRP for relevant ongoing trials and performed forward  
31  
32 searches of included trials and relevant reviews in Web of Science. We assessed internal  
33  
34 validity of included trials using the Cochrane Risk of Bias tool, and the external validity  
35  
36 using the GRADE methodology. From 11580 citations we included 18 unique trials, and  
37  
38 2 companion papers enrolling 1170 patients. Using a Mantel-Haenszel random-effects  
39  
40 model, iron supplementation was associated with reduced self-reported fatigue  
41  
42 (standardized mean difference (SMD) -0.38; 95% CI -0.52 to -0.23;  $I^2$  0%; 4 trials; 714  
43  
44 participants), but was not associated with differences in objective measures of physical  
45  
46 capacity, including maximal oxygen consumption ( $VO_2$  max) (SMD 0.11; 95% CI -0.15  
47  
48 to 0.37;  $I^2$  0%; 9 trials; 235 participants), and timed methods of exercise testing. Iron  
49  
50 supplementation significantly increased serum hemoglobin concentration (MD 4.01 g/L;  
51  
52  
53  
54  
55  
56  
57  
58  
59  
60

1  
2  
3 95% CI 1.22 to 6.81;  $I^2 = 48\%$ ; 12 trials; 298 participants) and serum ferritin (MD 9.23  
4  
5  $\mu\text{mol/L}$ ; 95% CI 6.48 to 11.97;  $I^2 58\%$ ; 14 trials; 616 participants).

7  
8 CONCLUSION: In iron deficient non-anemic adults, iron supplementation is associated  
9  
10 with reduced subjective measures of fatigue, but not with objective improvements in  
11  
12 physical capacity. Given the global prevalence of both iron deficiency and fatigue,  
13  
14 patients and practitioners could consider consumption of iron-rich foods or iron  
15  
16 supplementation to improve symptoms of fatigue in the absence of documented anemia.  
17  
18

19 SYSTEMATIC REVIEW REGISTRATION: PROSPERO (CRD42014007085)  
20  
21  
22  
23  
24  
25  
26  
27  
28  
29  
30  
31  
32  
33  
34  
35  
36  
37  
38  
39  
40  
41  
42  
43  
44  
45  
46  
47  
48  
49  
50  
51  
52  
53  
54  
55  
56  
57  
58  
59  
60

## STUDY STRENGTHS and LIMITATIONS:

### Strengths:

- We used a comprehensive search strategy, an *a priori* protocol, and adhered to established methodological (e.g. PRISMA, GRADE) guidelines
- We identified an at-risk patient population, for whom iron deficiency is highly prevalent, but treatment is unknown
- Our outcomes are clinically relevant and patient centered

### Limitations:

- Our search was limited to English studies
- In effort to quantify elemental iron administration, we did not include studies evaluating dietary iron fortification

## INTRODUCTION

Iron deficiency (ID) is estimated to affect two billion people, and is the leading cause of anemia worldwide<sup>1,2</sup>. Iron is necessary for cellular immune responses, oxidative metabolism within the mitochondria, and production of hemoglobin and myoglobin.

When iron losses exceed dietary iron absorption, iron stores become depleted resulting in impaired hemoglobin production and decreased red blood cell hemoglobin content<sup>3</sup>.

Reduction in hemoglobin concentration below a threshold (conventionally defined by the World Health Organization (WHO) as 120g/L for females and 130g/L for males) signifies anemia<sup>4</sup>.

It is well established that anemia results in decreased physical capacity and increased fatigue proportional to anemia severity<sup>5-9</sup>. Unfortunately, patient-reported

1  
2  
3 fatigue is common in community and primary care settings with a prevalence ranging  
4  
5 from 7 to 45%<sup>10</sup>. It is estimated that the indirect annual economic consequence of chronic  
6  
7 fatigue in the United States is 9.1 billion dollars<sup>11</sup>.  
8  
9

10 The clinical relevance of iron deficiency in the absence of anemia is poorly  
11  
12 understood, but may impact well-being, perceptions of fatigue, or contribute to  
13  
14 decrements in physical performance through impairment in biochemical processes  
15  
16 including tissue and mitochondrial oxidative capacity<sup>8</sup>. While iron replacement can  
17  
18 normalize hemoglobin concentration, restore work capacity and improve fatigue in iron  
19  
20 deficiency anemia, it is unclear if supplementation affects fatigue and physical capacity in  
21  
22 iron deficient but non-anemic (IDNA) individuals. In the absence of compelling efficacy  
23  
24 data on well-being or muscle function, the use of iron supplements are common in the  
25  
26 general population and are routinely recommended to high performance athletes to  
27  
28 enhance performance.  
29  
30  
31  
32

33 Given the global prevalence of iron deficiency and impact of fatigue, the purpose  
34  
35 of this systematic review is to identify, critically appraise and meta-analyse data from  
36  
37 prospective randomized trials evaluating iron therapy in adults with IDNA.  
38  
39  
40  
41

## 42 METHODS

43

44 Using an *a priori* published protocol (CRD42014007085; available at  
45  
46 <https://www.crd.york.ac.uk/PROSPERO/>)<sup>12</sup>, we conducted a systematic review using  
47  
48 methodological approaches outlined in the *Cochrane Handbook for Systematic Reviewers*  
49  
50 and reported according to the Preferred Reporting Items for Systematic Reviews and  
51  
52 Meta-Analysis (PRISMA) criteria<sup>12-14</sup>. A panel of experts from multiple fields (e.g.  
53  
54  
55  
56  
57  
58  
59  
60



1  
2  
3 internal medicine, hematology, kinesiology, gastroenterology, research methodology)  
4  
5 formulated the research question, reviewed search strategies and methods, and provided  
6  
7 input throughout the review process.  
8  
9

## 10 11 12 Populations, Interventions, Comparators, Outcome Measures, Setting and Study Designs 13

14  
15 Our research question was “In iron depleted but non-anemic adults, does iron  
16  
17 supplementation improve fatigue and physical capacity.” We included randomized  
18  
19 controlled trials of adults ( $\geq 18$  years) who were iron deficient but non-anemic (Appendix  
20  
21 1). Interventions included oral, intramuscular or intravenous iron supplementation; all  
22  
23 therapy doses, frequencies and durations were included. We included trials that evaluated  
24  
25 outcomes at least 28 days from the initiation of iron therapy. Comparators included  
26  
27 placebo or active therapy. Our exclusion criteria are presented in Appendix 2.  
28  
29

30  
31 Our primary outcome measures were self-reported fatigue and objective measures of  
32  
33 physical capacity. Secondary outcomes included the incidence of anemia, change in  
34  
35 hemoglobin concentration and serum ferritin, and the incidence of adverse outcomes  
36  
37 including iron toxicity, constipation, diarrhea, gastrointestinal intolerance and nausea.  
38  
39

## 40 41 42 Search Strategy for Identification of Studies 43

44  
45 We searched Medline, Embase, CENTRAL (Cochrane Library), CINAHL,  
46  
47 SportDiscus, and CAB Abstracts from inception to October 31, 2016 to identify relevant  
48  
49 citations of published trials, using individualized systematic search strategies for each  
50  
51 database. The MEDLINE strategy is presented in Appendix 3. We searched the World  
52  
53 Health Organization's (WHO) International Clinical Trials Registry Platform (ICTRP),  
54  
55  
56  
57  
58  
59

1  
2  
3 clinicaltrials.gov and relevant conference proceedings to identify planned, ongoing, or  
4 recently completed but unpublished trials. We performed forward searches of included  
5 trials and relevant reviews in Web of Science to identify additional citations, and  
6  
7 contacted study authors to request pertinent unpublished data or provide clarifications on  
8 study methods or results. Reference lists of narrative and systematic reviews and of the  
9 included trials were searched for additional citations. We performed reference  
10 management in EndNote™ (Version X7, Thomson Reuters, Philadelphia, PA, USA).  
11  
12  
13  
14  
15  
16  
17  
18  
19  
20

## 21 Study Selection, Data Extraction and Quality Assessment

22 We screened citations, selected studies and extracted data from included trials  
23 using standardized and piloted screening and data extraction forms. Citation screening,  
24 study selection and data extraction were performed in duplicate. The following data were  
25 extracted from each trial: author identification, publication year, publication language,  
26 trial location, source of trial funding, participant characteristics (age, sex, weight),  
27 intervention/comparator (drug utilized, dose (elemental iron), route of administration,  
28 duration), as well as results for the primary and secondary outcomes. We assessed the  
29 internal validity of included trials using the Cochrane Collaboration Risk of Bias tool<sup>13</sup>.  
30  
31 Discrepancies between the two reviewers were resolved by consensus or by a third  
32 reviewer (RZ), as required. Data extraction and descriptive statistics were performed  
33 using Microsoft Excel 2016 (Excel version 15, Microsoft Corp).  
34  
35  
36  
37  
38  
39  
40  
41  
42  
43  
44  
45  
46  
47  
48  
49  
50

## 51 Data Analysis

1  
2  
3 Data analysis was performed using Review Manager (RevMan v5.3.5, The Nordic  
4 Cochrane Center, The Cochrane Collaboration, Copenhagen, Denmark). Study level  
5  
6 comparisons of dichotomous data were presented as risk ratios (RR) with 95%  
7  
8 confidence intervals (CI). Pooled continuous data were expressed as the mean difference  
9  
10 (MD), or standardized mean difference (SMD). Change scores or post-treatment means  
11  
12 were extracted to inform summary estimates for continuous data. Pooled risk ratios and  
13  
14 95% confidence intervals were calculated using Mantel-Haenszel random-effects model.  
15  
16 Pooled MDs or SMDs were calculated using a random-effects model. For the primary  
17  
18 outcome of fatigue, if multiple scales were reported, fatigue-specific scores were  
19  
20 preferred over general scores and the most commonly reported and clinically meaningful  
21  
22 score was used to generate summary effect measures. In studies evaluating exercise  
23  
24 capacity, weight-based VO<sub>2</sub> max values were utilized preferentially if both absolute and  
25  
26 weight-based VO<sub>2</sub> max results were provided. Statistical heterogeneity was quantified  
27  
28 using the I<sup>2</sup> statistic<sup>15</sup>. For the primary outcomes of fatigue and work capacity, we  
29  
30 evaluated potential publication bias using funnel plot analysis<sup>16</sup>. All tests of statistical  
31  
32 inference reflect a 2-sided  $\alpha$  of 0.05.  
33  
34  
35  
36  
37  
38  
39  
40  
41

### 42 Subgroup Analyses

43  
44 We performed subgroup analyses for fatigue and exercise capacity outcomes  
45  
46 according to biologic sex, athletic status (athlete or non-athlete), method of iron  
47  
48 administration, duration of therapy, duration of study follow up, and risk of bias.  
49  
50  
51  
52

### 53 Grading the Evidence

1  
2  
3 We graded the strength of evidence for our primary outcomes using the GRADE  
4 methodology. This approach classifies the strength of evidence as “*high*”, “*moderate*”,  
5 “*low*” or “*very low*.”  
6  
7  
8  
9  
10

## 11 RESULTS

### 12 Trial Characteristics & Study Populations

13  
14  
15 Of the 11,580 citations identified, we included 18 unique trials and two  
16 companion papers<sup>17,18</sup>, enrolling 1170 subjects (Figure 1; Table 1). Trials were published  
17 between 1989 and 2015, and all trials were published in peer-reviewed journals. Eight  
18 trials<sup>19-26</sup> were from North America, seven trials<sup>27-33</sup> were from Europe, two trials<sup>18,34</sup>  
19 were from Australia, and one trial<sup>35</sup> was from Asia.  
20  
21  
22  
23  
24  
25  
26  
27  
28

29 Exclusively healthy females (aged 17 to 55 years old) with varying levels of  
30 fitness (sedentary to well-trained) were enrolled in all but three studies<sup>22,27,29</sup>. The WHO  
31 cutoff for anemia [hemoglobin concentration  $\geq 130$  g/L (males) and  $\geq 120$  g/L (females)]  
32 was used by 9 studies<sup>19,22-25,30-32,35</sup>, whereas 7 studies used lower values ranging from  
33  $\geq 110$  to  $< 120$  g/L<sup>20,21,27,28,33,34,36</sup>, and baseline hemoglobin concentration was not provided  
34 in 2 trial reports<sup>26,29</sup>.  
35  
36  
37  
38  
39  
40  
41  
42

43 All trials were placebo-controlled. In 13 of 18 trials (72%), we considered the  
44 blinding of participants and personnel to be adequate. Likewise, 10 trials (55%)  
45 adequately incorporated blinded outcome assessment. One trial<sup>29</sup> was considered to have  
46 a low risk of bias (Table 2). The remainder of the trials were considered unclear risk of  
47 bias, due to unclear processes of randomization (12 trials<sup>19-27,30,33,34</sup>) or allocation  
48 concealment (13 trials<sup>19-27,30,31,34,35</sup>).  
49  
50  
51  
52  
53  
54  
55  
56  
57  
58  
59  
60

**Table 1. Characteristics of individual trials, patient populations and interventions**

| Trial #       | Source                    | Population                                      | No. of patients (iron) | No. of patients (control) | Control        | Age (range) | Min Hb (g/L)     | Max ferritin (ug/L) | Iron type             | Daily iron dose (mg) | Iron route | Iron duration (days) | Follow-up (days) |
|---------------|---------------------------|-------------------------------------------------|------------------------|---------------------------|----------------|-------------|------------------|---------------------|-----------------------|----------------------|------------|----------------------|------------------|
| 1             | Brownlie <sup>17,19</sup> | Physically active untrained women               | 22                     | 19                        | Placebo        | 18-33       | 120              | 16                  | Ferrous sulfate       | 16                   | PO         | 42                   | 42               |
| 2             | Brutsaert <sup>20</sup>   | Untrained women                                 | 10                     | 10                        | Placebo        | 18-45       | 110              | 20                  | Ferrous sulfate       | 18.1                 | PO         | 42                   | 42               |
| 3             | Burden <sup>27</sup>      | University endurance runners                    | 7                      | 8                         | Saline         |             | 120              | 30 (F); 40 (M)      | Ferric carboxymaltose | 500                  | IV         | 1                    | 28               |
| 4             | Donangelo <sup>21</sup>   | Young women                                     | 12                     | 11                        | Zinc gluconate | 20-28       | 110              | 20                  | Ferrous sulfate       | 100                  | PO         | 56                   | 70               |
| 5             | Favrat <sup>28</sup>      | Premenopausal women with fatigue                | 144                    | 146                       | Saline         |             | 115              | 15                  | Ferric carboxymaltose | 1000                 | IV         | 1                    | 56               |
| 6             | Flink <sup>29</sup>       | Individuals with low unstimulated salivary flow | 25                     | 21                        | Placebo        | 15-46       |                  | 30 (F); 50 (M)      | Ferrous fumarate      | 120                  | PO         | 90                   | 90               |
| 7             | Fogelholm <sup>30</sup>   | Female athletes                                 | 17                     | 14                        | Placebo        | 17-31       | 120              | 25                  | Ferrous sulfate       | 100                  | PO         | 56                   | 56               |
| 8             | Hinton <sup>22</sup>      | Recreationally trained individuals              | 9                      | 8                         | Placebo        | 18-41       | 120 (F); 130 (M) | 16                  | Ferrous sulfate       | 30                   | PO         | 42                   | 42               |
| 9             | Klingshim <sup>23</sup>   | Female endurance runners                        | 9                      | 9                         | Placebo        | 22-39       | 120              | 20                  | Ferrous sulfate       | 100                  | PO         | 56                   | 56               |
| 10            | Krayenbuehl <sup>31</sup> | Premenopausal women with fatigue                | 43                     | 47                        | Saline         |             | 120              | 50                  | Venofer               | 200                  | IV         | 4                    | 84               |
| 11            | LaManca <sup>26</sup>     | Healthy females                                 | 28                     | 28                        | Placebo        |             |                  | 20                  | Ferrous sulfate       | 100                  | PO         | 56                   | 56               |
| 12            | Leonard <sup>18,36*</sup> | Young women                                     | 16*                    | 8                         | Placebo        | 18-35       | 115              | 20                  | Ferrous sulfate       | 60/80                | PO         | 112                  | 112              |
| 13            | Moafi <sup>35</sup>       | Female students                                 | 36                     | 36                        | Placebo        | 18-35       | 120              | 20                  | Ferrous sulfate       | 50                   | PO         | 42                   | 42               |
| 14            | Newhouse <sup>24</sup>    | Young women                                     | 19                     | 21                        | Placebo        | 18-40       | 120              | 20                  | Ferrous sulfate       | 200                  | PO         | 56                   | 56               |
| 15            | Peeling <sup>34</sup>     | Well-trained female athletes                    | 8                      | 8                         | Saline         |             | 115              | 35                  | Ferrum H              | 100                  | IM         | 5                    | 28               |
| 16            | Vaucher <sup>32</sup>     | Women with fatigue from clinic                  | 102                    | 96                        | Placebo        | 18-50       | 120              | 50                  | Ferrous sulfate       | 80                   | PO         | 84                   | 84               |
| 17            | Verdon <sup>33</sup>      | Women with fatigue from clinic                  | 71                     | 65                        | Placebo        | 18-55       | 117              |                     | Ferrous sulfate       | 80                   | PO         | 28                   | 28               |
| 18            | Zhu <sup>25</sup>         | Physically active women                         | 20                     | 17                        | Placebo        | 19-36       | 120              | 16                  | Ferrous sulfate       | 135.3                | PO         | 56                   | 56               |
| <b>TOTAL:</b> |                           |                                                 | <b>598</b>             | <b>572</b>                |                |             |                  |                     |                       |                      |            |                      |                  |

\*Trial included two intervention arms, with 8 patients enrolled in each arm; represents weighted averages between two iron treatment groups; Max = maximum; Min = minimum; Hb = hemoglobin; F = females; M = males; PO = oral; IM = intramuscular; IV = intravenous

**Table 2. Cochrane Risk of Bias summary.** Green (+) = low risk of bias; Yellow (?) = unclear risk of bias

|                           | OVERALL | Random sequence generation | Allocation concealment | Blinding of participants and personnel | Blinding of outcome assessment | Incomplete outcome data | Selective reporting | Other |
|---------------------------|---------|----------------------------|------------------------|----------------------------------------|--------------------------------|-------------------------|---------------------|-------|
| Brownlie <sup>17,19</sup> | ?       | ?                          | ?                      | +                                      | ?                              | ?                       | +                   | +     |
| Brutsaert <sup>20</sup>   | ?       | ?                          | ?                      | +                                      | ?                              | ?                       | +                   | +     |
| Burden <sup>27</sup>      | ?       | ?                          | ?                      | +                                      | +                              | +                       | +                   | +     |
| Donangelo <sup>21</sup>   | ?       | ?                          | ?                      | ?                                      | ?                              | +                       | +                   | +     |
| Favrat <sup>28</sup>      | ?       | +                          | +                      | ?                                      | ?                              | ?                       | +                   | +     |
| Flink <sup>29</sup>       | +       | +                          | +                      | +                                      | +                              | +                       | +                   | +     |
| Fogelholm <sup>30</sup>   | ?       | ?                          | ?                      | +                                      | +                              | +                       | +                   | +     |
| Hinton <sup>22</sup>      | ?       | ?                          | ?                      | ?                                      | ?                              | +                       | +                   | +     |
| Klingshirn <sup>23</sup>  | ?       | ?                          | ?                      | +                                      | ?                              | +                       | +                   | +     |
| Krayenbuehl <sup>31</sup> | ?       | +                          | ?                      | +                                      | +                              | +                       | ?                   | +     |
| LaManca <sup>26</sup>     | ?       | ?                          | ?                      | ?                                      | ?                              | +                       | +                   | +     |
| Leonard <sup>18,36</sup>  | ?       | +                          | +                      | +                                      | +                              | ?                       | +                   | +     |
| Moafi <sup>35</sup>       | ?       | +                          | ?                      | +                                      | +                              | +                       | +                   | +     |
| Newhouse <sup>24</sup>    | ?       | ?                          | ?                      | +                                      | +                              | ?                       | +                   | +     |
| Peeling <sup>34</sup>     | ?       | ?                          | ?                      | ?                                      | ?                              | +                       | +                   | +     |
| Vaucher <sup>32</sup>     | ?       | +                          | +                      | +                                      | +                              | ?                       | +                   | +     |
| Verdon <sup>33</sup>      | ?       | ?                          | +                      | +                                      | +                              | +                       | +                   | +     |
| Zhu <sup>25</sup>         | ?       | ?                          | ?                      | +                                      | +                              | +                       | +                   | +     |

## Interventions

Iron interventions consisted of iron supplementation administered orally, intramuscularly or intravenously. Of the trials evaluating oral supplements, all but one<sup>29</sup> used ferrous sulfate (13 trials<sup>19-26,30,32,33,35,36</sup>, 713 participants). Intravenous iron was administered in three trials<sup>27,28,31</sup> (395 participants), and intramuscular iron in one trial<sup>34</sup> (16 participants). In trials using oral iron<sup>19-26,29,30,32,33,35,36</sup>, the mean daily elemental iron dose was 86.9mg ( $\pm$  49.1mg; range: 16 to 200mg). In trials reporting intravenous iron<sup>27,28,31</sup>, the mean daily elemental iron dose was 566mg ( $\pm$  330mg; range 200 to 1000mg) and mean total elemental iron dose 767mg ( $\pm$  206mg; range 500 to 1000mg). Among all studies, the mean duration of iron therapy was 46 days ( $\pm$  30 days; range 1 to 112 days), and mean duration of follow-up was 57 days ( $\pm$  24 days; range 28 to 112 days).

## Primary Outcomes

### *Fatigue*

Four trials<sup>28,31-33</sup> enrolling 714 participants were eligible for meta-analysis. Iron supplementation was associated with a reduction in subjective measures of fatigue when assessed by either the Piper Fatigue Scale (PFS),<sup>28</sup> the Current and Past Psychological State scale (CAPPS),<sup>32</sup> visual analog scale<sup>33</sup> or Brief Fatigue Inventory questionnaire (BFI)<sup>31</sup> (SMD -0.38; 95% CI -0.52 to -0.23;  $I^2$  0%) (Figure 2). In one trial using the BFI score, fatigue was not significantly different between groups after 12 weeks, although it was improved in the subgroup of participants with the lowest iron stores (ferritin  $\leq$  15 ng/ml or transferrin saturation  $\leq$  20%)<sup>31</sup>. Evaluation of publication bias was not possible due to the low number of included trials. Given that the majority of trials were of unclear risk of bias, we graded the overall strength of evidence as moderate.

### *Physical Capacity*

Physical capacity was reported in 10 trials<sup>19,20,22-27,30,34</sup> (291 participants); all but one<sup>20</sup> of the trials employed at least one of three common aerobic tests of physical capacity: time trial<sup>22,25</sup>, time to exhaustion<sup>23,26,27,34</sup>, or  $VO_2$  max<sup>19,22-27,30,34</sup> performance from a graded exercise test. In two trials (79 participants) that used 15 km time trials<sup>22,25</sup>, iron supplementation was not associated with improved exercise capacity (SMD -0.09; 95% CI -0.53 to 0.35;  $I^2$  0%) (Figure 3A). In four trials<sup>23,26,27,34</sup> (69 participants) that used time-to-exhaustion tests, iron supplementation did not significantly improve exercise capacity (SMD 0.25; 95% CI -0.22 to 0.73;  $I^2$  0%) (Figure 3B). Nine trials<sup>19,22-27,30,34</sup> (235

1  
2  
3 participants) reported VO<sub>2</sub> max as a surrogate measure of physical capacity. Iron  
4  
5 supplementation did not increase VO<sub>2</sub> max (SMD 0.11; 95% CI -0.15 to 0.37; I<sup>2</sup> 0%)  
6  
7 (Figure 3C). We found no evidence of funnel plot asymmetry to suggest publication bias  
8  
9 for this outcome (Appendix 4). The overall strength of the evidence for time trial, time to  
10  
11 exhaustion and VO<sub>2</sub> max outcomes were low, given the imprecision of effect estimates  
12  
13 and that the majority of trials were of unclear risk of bias.  
14  
15

16  
17 One trial<sup>20</sup> (20 participants) used dynamic knee extension exercise to evaluate  
18  
19 changes in physical capacity. In this trial, the decline in maximum voluntary contraction  
20  
21 after 6 minutes of exercise was significantly less in participants randomized to receive  
22  
23 iron. Among 16 other unique measures of physical capacity, 19% (3 of 16) found  
24  
25 statistically significant increases in measures of physical capacity with iron  
26  
27 supplementation (Appendix 5).  
28  
29  
30  
31  
32

### 33 *Subgroup analysis*

34  
35 Subgroup analyses based on method of iron administration and duration of  
36  
37 follow-up demonstrated no statistically significant differences in subjective fatigue  
38  
39 (Appendix 6). Biologic sex, athletic status (athlete vs. non-athlete) and risk of bias could  
40  
41 not be evaluated as all trials contributing data to the meta-analyses enrolled females of  
42  
43 uncharacterized athletic status, and were of unclear risk of bias<sup>28,31-33</sup>. Subgroup analyses  
44  
45 evaluating athletic status and method of iron administration demonstrated no statistically  
46  
47 significant differences in objective physical capacity (Appendix 7). Biologic sex, duration  
48  
49 of follow-up and risk of bias were unevaluable as all trials enrolled females with follow-  
50  
51 up of less than 2 months, and all were of unclear risk of bias<sup>19,22-27,30,34</sup>.  
52  
53  
54  
55  
56  
57  
58  
59  
60



## Secondary Outcomes and Adverse Events

Despite the absence of baseline anemia, iron supplementation significantly increased serum hemoglobin concentration (MD 4.01 g/L; 95% CI 1.22 to 6.81;  $I^2 = 48\%$ ; 12 trials; 298 participants)<sup>18-27,30,34</sup> (Appendix 8). In two trials<sup>25,28</sup> reporting incident anemia, a new diagnosis of anemia at trial completion was less common in patients randomized to receive iron supplementation. Iron supplementation also significantly increased serum ferritin (MD 9.23  $\mu\text{mol/L}$ ; 95% CI 6.48 to 11.97;  $I^2 = 58\%$ ; 14 trials; 616 participants) (Appendix 9).

Adverse events were sparsely reported. Gastrointestinal intolerance was reported in three trials<sup>23,29,32</sup>, and was significantly increased in one trial<sup>29</sup> using intramuscular iron administration, but not in the two trials<sup>23,32</sup> that used oral administration. Nausea was reported in four trials<sup>18,28,31,33</sup>; two trials<sup>28,31</sup> using intravenous administration of iron reported significantly increased nausea, whereas nausea was not increased in patients who received iron by oral administration<sup>18,33</sup>. Constipation was reported in one trial<sup>18</sup>, and diarrhea in two trials<sup>18,31</sup> (Appendix 10). Adherence with the study intervention was reported in 13 trials<sup>18,19,22-29,32,33,35</sup>. Iron supplementation was not associated with differential rates of medication adherence (RR 1.0; CI 95% 0.99 to 1.01;  $I^2 = 0\%$ ; 12 trials; 958 participants). The route of administration of the study intervention was also not associated with differences in adherence (Appendix 11).

## DISCUSSION

1  
2  
3 In iron deficient but non-anemic adults, we found iron supplementation was  
4 associated with reduced subjective measures of fatigue but had no significant impact on  
5 objective physical capacity. Given iron deficiency is the most prevalent micronutrient  
6 deficiency worldwide<sup>2</sup>, there is a discrepant lack of robust evidence evaluating iron  
7 supplementation in the absence of anemia across important patient populations. Despite  
8 rigorous and systematic methodology, we were only able to identify 18 trials enrolling  
9 1170 adults, representing a minute fraction of affected individuals.  
10  
11  
12  
13  
14  
15  
16  
17  
18

19 While treatment of iron deficiency in the absence of anemia is associated with  
20 reduced subjective fatigue, whether this translates to clinically meaningful outcomes,  
21 including quality of life, work absenteeism, job or athletic performance is uncertain.  
22  
23 Contrary to iron deficiency with established anemia, lack of robust data in iron deficient  
24 but non-anemic individuals is reflected in the under-representation of guideline  
25 recommendations pertaining to this larger population. The proportion of iron deficient,  
26 non-anemic individuals who receive supplementation is further unknown.  
27  
28  
29  
30  
31  
32  
33  
34

35 Our systemic review builds on the results of three published evidence syntheses  
36 evaluating iron supplementation<sup>37-39</sup>. In a systematic review of healthy menstruating  
37 women, iron supplementation, irrespective of iron status or anemia, improved  
38 hemoglobin and measures of iron stores<sup>37</sup>. Two systematic reviews included studies of  
39 pregnant women, blood donors and children, and included data from both randomized  
40 and non-randomized trials<sup>38,39</sup>. These studies concluded benefit of iron supplementation,  
41 although in the review by *Yokoi et al*, the benefit was limited to randomized controlled  
42 trials. Despite the high prevalence of iron deficiency, significant heterogeneity in patient  
43  
44  
45  
46  
47  
48  
49  
50  
51  
52  
53  
54  
55  
56  
57  
58  
59  
60

1  
2  
3 populations and study designs, and absence of data pertaining to objective muscle  
4 performance limits the generalizability of these findings.  
5  
6

7  
8 In trials where a proportion of participants were anemic at enrollment, and with  
9 the knowledge that anemia results in decreased physical capacity, iron supplementation  
10 has previously been associated with improved maximal and submaximal exercise  
11 performance<sup>5-8</sup>. We found insufficient evidence to suggest that iron supplementation  
12 improves exercise capacity in iron-depleted non-anemic adults, differing from the results  
13 of physiologic experiments that describe VO<sub>2</sub> max improvements with iron  
14 supplementation, independent of hemoglobin<sup>40</sup>. These findings were postulated to be  
15 secondary to iron-mediated improvements in muscle oxidative capacity and improved  
16 mitochondrial function, the validity of which is unclear<sup>40</sup>.  
17  
18  
19  
20  
21  
22  
23  
24  
25  
26  
27

28 A potential weakness our systematic review is the difficulty masking oral iron due  
29 to predictable gastrointestinal side effects and changes in stool color, and the impact of  
30 imperfect blinding on subjective measures of fatigue. However, despite this, fatigue was  
31 consistently reduced in trials evaluating both oral (n = 2) and intravenous (n = 2) iron  
32 preparations. Healthy females comprised the study population in 15 of 18 included trials;  
33 subjective measures of fatigue may not consistently apply to other at-risk populations.  
34  
35  
36  
37  
38 The duration of follow was relatively short (57 days; range 28-112 days) and perhaps too  
39 brief to expect significant changes in muscle metabolism or function. Finally, the lack of  
40 systematic reporting of adverse events impairs our ability to draw conclusions regarding  
41 the incidence of these events and tolerability of iron therapy.  
42  
43  
44  
45  
46  
47  
48  
49  
50

51 The strengths of this review include the comprehensiveness of the search strategy,  
52 which included electronic databases, trial registries, and forward searches. We used an *a*  
53  
54  
55  
56  
57  
58  
59  
60

1  
2  
3 *priori* published protocol and followed established methodological guidelines concerning  
4  
5 the conduct and reporting of this review. We synthesized patient-centered outcomes and  
6  
7 evaluated efficacy in the context of relevant safety outcomes and adverse events. In  
8  
9 contrast to the systematic review of *Low et al*, we excluded studies that enrolled patients  
10  
11 with anemia at baseline<sup>37</sup>. While cut-offs for anemia varied slightly among included  
12  
13 trials, this important inclusion criteria reduces (but may not eliminate) the probability that  
14  
15 changes in fatigue or muscle function are due to correction of anemia or independent of  
16  
17 oxygen carrying capacity reflecting increased red cell mass. While the duration of follow  
18  
19 up in most studies was modest, the mean daily elemental iron dose ( $86.9 \pm 49.1$ mg)  
20  
21 reflects a recommended ‘treatment’ for patients with iron deficiency anemia<sup>41</sup>.  
22  
23  
24  
25

26 In iron deficient non-anemic adults, iron supplementation is associated with  
27  
28 reduced subjective measures of fatigue, but not with objective improvements in physical  
29  
30 capacity. Given the global prevalence of both iron deficiency and fatigue, patients and  
31  
32 practitioners could consider consumption of iron-rich foods or iron supplementation to  
33  
34 improve symptoms of fatigue in the absence of documented anemia.  
35  
36  
37  
38  
39  
40  
41  
42  
43  
44  
45  
46  
47  
48  
49  
50  
51  
52  
53  
54  
55  
56  
57  
58  
59  
60

1  
2  
3 *Figure Legends:*  
4

5 **Figure 1. Study flow diagram following the Preferred Reporting Items of Systematic**  
6 **Reviews and Meta-Analyses (PRISMA)<sup>14</sup> with modifications.** Of the 11,580 citations  
7 identified, we included 18 unique trials and two companion papers.  
8

9  
10 **Figure 2. The effect of iron supplementation on patient-reported fatigue, using**  
11 **validated fatigue scores.** Iron supplementation was associated with a reduction in  
12 subjective measures of fatigue when assessed by either the Piper Fatigue Scale (PFS), the  
13 Current and Past Psychological State scale (CAPPS), visual analog scale or Brief Fatigue  
14 Inventory questionnaire (BFI).  
15

16  
17 **Figure 3. The effect of iron supplementation on measures of physical capacity.** Iron  
18 supplementation was not associated with a reduction in objective measures of physical  
19 capacity when assessed by either maximal oxygen consumption (VO<sub>2</sub> max) and timed  
20 methods of exercise testing.  
21  
22  
23  
24  
25  
26  
27  
28  
29  
30  
31  
32  
33  
34  
35  
36  
37  
38  
39  
40  
41  
42  
43  
44  
45  
46  
47  
48  
49  
50  
51  
52  
53  
54  
55  
56  
57  
58  
59  
60

1  
2  
3 *Contribution:*  
4

5 Two researchers (BH and DH) lead and coordinated all aspects of the review,  
6 including but not limited to preparation of the literature search, screening relevant  
7 material, data analysis and extraction, interpretation of the results of the meta-analytic  
8 procedures, bias investigation, and preparation of the final report; three second reviewers  
9 (JG, ER, BP) conducted independent screening of relevant material, extracted and  
10 analyzed data and aided in report preparation; one hematologist/ intensivist (RZ),  
11 methodologist (DAF), and anesthetist/intensivist (AFT) with expertise in systematic  
12 reviews provided content expertise and methodological input, and resolved disagreement  
13 among reviewers; one systematic review expert (AMAS) provided methodological input;  
14 two hematologists (DSH and ER), one gastroenterologist (CB) and one statistician (RR)  
15 provided content expertise. All authors were involved in the process of study design and  
16 manuscript review.  
17  
18  
19  
20  
21  
22  
23  
24  
25  
26  
27  
28  
29  
30  
31  
32  
33  
34

35 *Competing interests:* the authors declare no competing financial interests.  
36  
37  
38  
39

40 *Funding:* funding was not obtained for completion of this study.  
41  
42  
43

44 *Data sharing:* We are submitting (in our manuscript and supplementary files) all planned  
45 data analyses.  
46  
47  
48  
49  
50  
51  
52  
53  
54  
55  
56  
57  
58  
59  
60

## References:

1. Kassebaum NJ, Jasrasaria R, Naghavi M, et al. A systematic analysis of global anemia burden from 1990 to 2010. *Blood*. 2014;123(5):615-624.
2. McLean E, Cogswell M, Egli I, Wojdyla D, de Benoist B. Worldwide prevalence of anaemia, WHO Vitamin and Mineral Nutrition Information System, 1993-2005. *Public Health Nutr*. 2009;12(4):444-454.
3. Milman N. Anemia--still a major health problem in many parts of the world! *Ann Hematol*. 2011;90(4):369-377.
4. Assessing the iron status of populations: including literature reviews: report of a Joint World Health Organization / Centers for Disease Control and Prevention Technical Consultation on the Assessment of Iron Status on the Population Level. Geneva, Switzerland; 2004:108.
5. Dallman PR. Iron deficiency: does it matter? *J Intern Med*. 1989;226(5):367-372.
6. Eichner ER. Fatigue of anemia. *Nutr Rev*. 2001;59(1 Pt 2):S17-19.
7. Florencio CA. Effects of iron and ascorbic acid supplementation on hemoglobin level and work efficiency of anemic women. *J Occup Med*. 1981;23(10):699-704.
8. Haas JD, Brownlie T. Iron deficiency and reduced work capacity: a critical review of the research to determine a causal relationship. *J Nutr*. 2001;131(2S-2):676S-688S; discussion 688S-690S.
9. Lukaski HC. Vitamin and mineral status: effects on physical performance. *Nutrition*. 2004;20(7-8):632-644.
10. Lewis G, Wessely S. The epidemiology of fatigue: more questions than answers. *J Epidemiol Community Health*. 1992;46(2):92-97.
11. Jason LA, Evans M, Brown M, Porter N. What is fatigue? Pathological and nonpathological fatigue. *PM R*. 2010;2(5):327-331.
12. Hurrie D, Graham J, Rimmer E, et al. Efficacy of iron replacement therapy on fatigue and work capacity in non-anemic adults with iron depletion: a systematic review of randomized controlled trials. PROSPERO International prospective register of systematic reviews; 2014.
13. The Cochrane Collaboration. In: J H, S G eds. *Cochrane Handbook for Systematic Reviews of Interventions*; 2009.
14. Liberati A, Altman DG, Tetzlaff J, et al. The PRISMA statement for reporting systematic reviews and meta-analyses of studies that evaluate healthcare interventions: explanation and elaboration. *BMJ*. 2009;339:b2700.
15. Higgins JP, Thompson SG. Quantifying heterogeneity in a meta-analysis. *Stat Med*. 2002;21(11):1539-1558.
16. Sterne JA, Egger M, Smith GD. Systematic reviews in health care: Investigating and dealing with publication and other biases in meta-analysis. *BMJ*. 2001;323(7304):101-105.
17. Hinton PS, Giordano C, Brownlie T, Haas JD. Iron supplementation improves endurance after training in iron-depleted, nonanemic women. *Journal of Applied Physiology*. 2000;88(3):1103-1111.
18. Leonard AJ, Chalmers KA, Collins CE, Patterson AJ. Comparison of two doses of elemental iron in the treatment of latent iron deficiency: efficacy, side effects and blinding capabilities. *Nutrients*. 2014;6(4):1394-1405.

19. Brownlie T, Utermohlen V, Hinton PS, Giordano C, Haas JD. Marginal iron deficiency without anemia impairs aerobic adaptation among previously untrained women. *Am J Clin Nutr.* 2002;75(4):734-742.
20. Brutsaert TD, Hernandez-Cordero S, Rivera J, Viola T, Hughes G, Haas JD. Iron supplementation improves progressive fatigue resistance during dynamic knee extensor exercise in iron-depleted, nonanemic women. *Am J Clin Nutr.* 2003;77(2):441-448.
21. Donangelo CM, Woodhouse LR, King SM, Viteri FE, King JC. Supplemental zinc lowers measures of iron status in young women with low iron reserves. *J Nutr.* 2002;132(7):1860-1864.
22. Hinton PS, Sinclair LM. Iron supplementation maintains ventilatory threshold and improves energetic efficiency in iron-deficient nonanemic athletes. *Eur J Clin Nutr.* 2007;61(1):30-39.
23. Klingshirn LA, Pate RR, Bourque SP, Davis JM, Sargent RG. Effect of iron supplementation on endurance capacity in iron-depleted female runners. *Med Sci Sports Exerc.* 1992;24(7):819-824.
24. Newhouse IJ, Clement DB, Taunton JE, McKenzie DC. The effects of prelatent/latent iron deficiency on physical work capacity. *Med Sci Sports Exerc.* 1989;21(3):263-268.
25. Zhu YI, Haas JD. Altered metabolic response of iron-depleted nonanemic women during a 15-km time trial. *J Appl Physiol (1985).* 1998;84(5):1768-1775.
26. LaManca JJ, Haymes EM. Effects of iron repletion on VO<sub>2</sub>max, endurance, and blood lactate in women. *Med Sci Sports Exerc.* 1993;25(12):1386-1392.
27. Burden RJ, Pollock N, Whyte GP, et al. Effect of Intravenous Iron on Aerobic Capacity and Iron Metabolism in Elite Athletes. *Med Sci Sports Exerc.* 2015;47(7):1399-1407.
28. Favrat B, Balck K, Breymann C, et al. Evaluation of a Single Dose of Ferric Carboxymaltose in Fatigued, Iron-Deficient Women - PREFER a Randomized, Placebo-Controlled Study. *PLoS One.* 2014;9(4).
29. Flink H, Tegelberg A, Thorn M, Lagerlof F. Effect of oral iron supplementation on unstimulated salivary flow rate: a randomized, double-blind, placebo-controlled trial. *J Oral Pathol Med.* 2006;35(9):540-547.
30. Fogelholm M, Jaakkola L, Lampisjärvi T. Effects of iron supplementation in female athletes with low serum ferritin concentration. *Int J Sports Med.* 1992;13(2):158-162.
31. Krayenbuehl PA, Battegay E, Breymann C, Furrer J, Schulthess G. Intravenous iron for the treatment of fatigue in nonanemic, premenopausal women with low serum ferritin concentration. *Blood.* 2011;118(12):3222-3227.
32. Vaucher P, Druais PL, Waldvogel S, Favrat B. Effect of iron supplementation on fatigue in nonanemic menstruating women with low ferritin: a randomized controlled trial. *CMAJ.* 2012;184(11):1247-1254.
33. Verdon F, Burnand B, Stubi CL, et al. Iron supplementation for unexplained fatigue in non-anaemic women: double blind randomised placebo controlled trial. *BMJ.* 2003;326(7399):1124.
34. Peeling P, Blee T, Goodman C, et al. Effect of iron injections on aerobic-exercise performance of iron-depleted female athletes. *Int J Sport Nutr Exerc Metab.* 2007;17(3):221-231.



- 1  
2  
3 35. Moafi A, Rahgozar S, Hanian M, et al. The effects of supplemental iron on  
4 educational achievements of students with "Iron deficiency without Anemia": A  
5 randomized, double-blind, placebo-controlled trial. *HealthMED*. 2012;6(6):2047-2051.  
6  
7 36. Leonard AJ, Chalmers KA, Collins CE, Patterson AJ. A study of the effects of  
8 latent iron deficiency on measures of cognition: a pilot randomised controlled trial of iron  
9 supplementation in young women. *Nutrients*. 2014;6(6):2419-2435.  
10  
11 37. Low MS, Speedy J, Styles CE, De-Regil LM, Pasricha SR. Daily iron  
12 supplementation for improving anaemia, iron status and health in menstruating women.  
13 *Cochrane Database Syst Rev*. 2016;4:CD009747.  
14  
15 38. Pratt JJ, Khan KS. Non-anaemic iron deficiency - a disease looking for  
16 recognition of diagnosis: a systematic review. *Eur J Haematol*. 2016;96(6):618-628.  
17  
18 39. Yokoi K, Konomi A. Iron deficiency without anaemia is a potential cause of  
19 fatigue: meta-analyses of randomised controlled trials and cross-sectional studies. *Br J*  
20 *Nutr*. 2017;117(10):1422-1431.  
21  
22 40. Friedmann B, Weller E, Mairbaurl H, Bartsch P. Effects of iron repletion on blood  
23 volume and performance capacity in young athletes. *Medicine and Science in Sports and*  
24 *Exercise*. 2001;33(5):741-746.  
25  
26 41. Camaschella C. Iron-deficiency anemia. *N Engl J Med*. 2015;372(19):1832-1843.  
27  
28  
29  
30  
31  
32  
33  
34  
35  
36  
37  
38  
39  
40  
41  
42  
43  
44  
45  
46  
47  
48  
49  
50  
51  
52  
53  
54  
55  
56  
57  
58  
59  
60



45  
46  
47  
48  
49

Figure 1. Study flow diagram following the Preferred Reporting Items of Systematic Reviews and Meta-Analyses (PRISMA)14 with modifications. Of the 11,580 citations identified, we included 18 unique trials and two companion papers.

215x279mm (300 x 300 DPI)

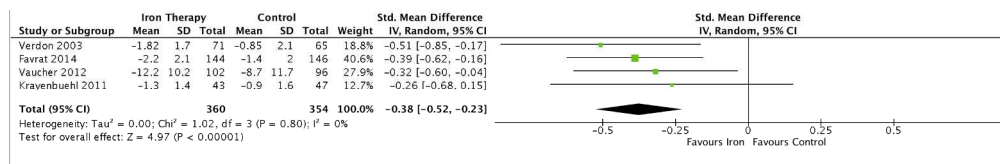

Figure 2. The effect of iron supplementation on patient-reported fatigue, using validated fatigue scores. Iron supplementation was associated with a reduction in subjective measures of fatigue when assessed by either the Piper Fatigue Scale (PFS), the Current and Past Psychological State scale (CAPPS), visual analog scale or Brief Fatigue Inventory questionnaire (BFI).

428x67mm (300 x 300 DPI)

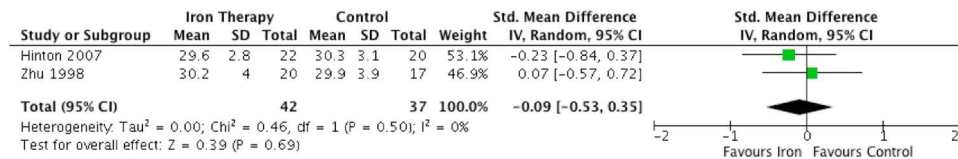

### 3A. 15 km time trial

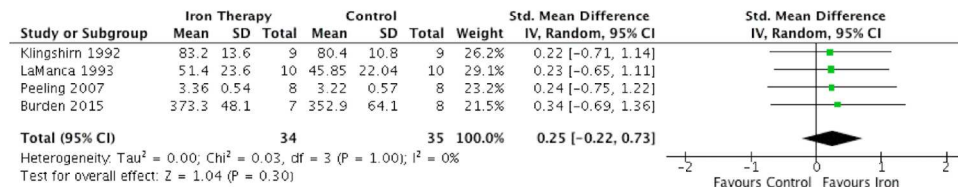

### 3B. Time to exhaustion

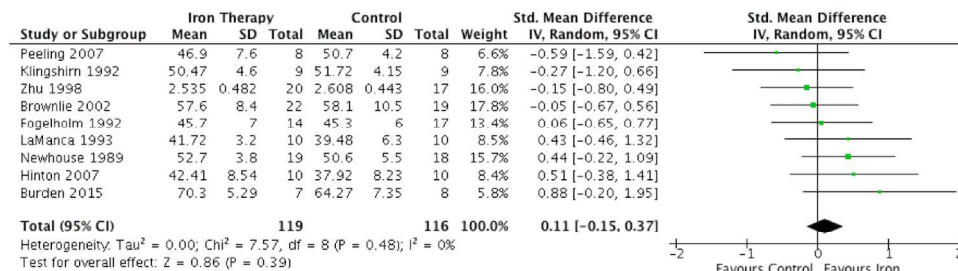

### 3C. Oxygen consumption (VO<sub>2</sub> max)

Figure 3. The effect of iron supplementation on measures of physical capacity. Iron supplementation was not associated with a reduction in objective measures of physical capacity when assessed by either maximal oxygen consumption (VO<sub>2</sub> max) and timed methods of exercise testing.

236x221mm (300 x 300 DPI)

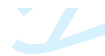

## Appendix 1. Inclusion criteria

1. Non-anemic ( $\geq 80\%$ ): Indicated by study cutoff values, or hemoglobin concentration [Hb]  $\geq 130$  g/L (males),  $\geq 120$  g/L (females);
2. Adults ( $\geq 18$  yrs); ( $\geq 80\%$ )
3. Iron Depleted ( $\geq 80\%$ ): According to study specific definition
4. Iron therapy administered as oral / intramuscular / intravenous therapy, all therapy durations, doses and frequencies of administration will be included
5. Studies where outcomes are assessed  $\geq 28$  days from the initiation of oral iron therapy
6. Only prospective randomized trials will be considered.

## Appendix 2. Exclusion criteria

1. Studies involving animals;
2. Females who were pregnant or breastfeeding;
3. Individuals with fatigue ( $\geq 20\%$ ) identified as being the result of some other pathology (i.e. psychiatric diagnosis, thyroid, liver, rheumatic, renal, cardiovascular, pulmonary, or oncologic cause)
4. Studies involving surgical patients
5. Studies involving author identified blood donors or phlebotomy
6. Studies assessing the pharmacokinetic properties of iron compounds in healthy volunteers where the short term outcomes are expressed as the objective (<1 month)
7. Non-English studies
8. Observational study designs, quasi-randomized, cross-over, or cluster randomized trials will not be considered for this review.
9. Studies where no relevant primary or secondary outcomes of interest are reported
10. Dietary fortification studies

### Appendix 3. Search strategy

#### *Ovid Multifile (MEDLINE & Embase)*

Database: Embase <1974 to 2015 Week 47>, Ovid MEDLINE(R) In-Process & Other Non-Indexed Citations and Ovid MEDLINE(R) <1946 to Present>

Search Strategy:

-----

- 1 Iron/df (4519)
- 2 exp Ferritins/df (87)
- 3 exp Ferrous Compounds/df (1)
- 4 ((decreased or deficien\* or deplet\* or inadequa\* or insufficien\* or low or marginal) adj3 (iron or ferritin\*).tw,kw. (55943)
- 5 or/1-4 (57094)
- 6 Anemia/pc [Prevention & Control] (3144)
- 7 Anemia, Iron-Deficiency/pc [Prevention & Control] (2061)
- 8 (prevent\* adj3 (anemi\* or anaemi\* or iron deficien\*).tw,kw. (2915)
- 9 Deficiency Diseases/dt (968)
- 10 Iron/ad, tu (8860)
- 11 exp Ferritins/ad, tu (185)
- 12 exp Ferrous Compounds/ad, tu (2094)
- 13 ((ferric or ferritin\* or ferrous or iron) adj3 (administer\* or administration\* or dietary or replac\* or supplement\* or therap\* or treatment\*).tw,kw. (33100)
- 14 (iron adj3 (capsule\* or infusion\* or injection\* or intravenous\* or IV or parenteral\* or pill or pills or medication\* or tablet\*).tw,kw. (10147)
- 15 Iron/ and Dietary Supplements/ (4252)
- 16 (ferrous sulfate or ferrous sulphate or aktiferrin or apo-ferrous sulfate or auryxia or bifera or biofer or ceferro or conferon or eisendragees-ratiopharm or eisensulfat stada or elite iron or femiron or feosol or feospan or fer-gen-sol or fer-in-sol or feratab or fergon or ferodan or fero-gradumet or ferro-gradumet or ferogradumet or ferrex 150 or ferrogamma or ferrogad or haemoprotect or hemobion or hemofer or hamatopan or haematopan or kendural or "Mol-Iron" or plastufer or "Slow-Fe" or vitaferro kapseln).tw,kw. (4979)
- 17 (ferrous fumarate or feostat or ferrocap or fersaday or fersamal or ferval or fumar or galfer or ircon or nephro-fer or palafer or rulofer).tw,kw. (510)
- 18 (ferrous gluconate or apo-ferrous gluconate or dextriferron or eisen-sandoz or "FeG Iron" or ferroglucon or ferrogluconaat or ferrum verla or loesferron or losferron or simron or vitaferro brause).tw,kw. (226)
- 19 or/6-18 (55320)
- 20 5 and 19 (17537)
- 21 (controlled clinical trial or randomized controlled trial).pt. (504747)
- 22 clinical trials as topic.sh. (180086)
- 23 (randomi#ed or randomly or RCT\$1 or placebo\*).tw. (1644668)
- 24 ((singl\* or doubl\* or trebl\* or tripl\*) adj (mask\* or blind\* or dumm\*).tw. (324774)
- 25 trial.ti. (344352)
- 26 or/21-25 (2079234)
- 27 20 and 26 (2880)
- 28 exp Animals/ not (exp Animals/ and Humans/) (9776432)
- 29 27 not 28 (2641)
- 30 (comment or editorial or interview or news).pt. (1640361)
- 31 (letter not (letter and randomized controlled trial)).pt. (1871051)
- 32 29 not (30 or 31) (2636)

1  
2  
3 33 32 use prmz (1373)  
4 34 iron deficiency/ (11754)  
5 35 iron deficiency anemia/ (28987)  
6 36 ((decreased or deficien\* or deplet\* or inadepu\* or insufficien\* or low or marginal) adj3  
7 (iron or ferritin\*).tw,kw. (55943)  
8 37 or/34-36 (71135)  
9 38 anemia/pc [Prevention] (3144)  
10 39 iron deficiency anemia/pc [Prevention] (2269)  
11 40 (prevent\* adj3 (anemi\* or anaemi\* or iron deficien\*).tw,kw. (2915)  
12 41 iron deficiency/dt [Drug Therapy] (1631)  
13 42 iron therapy/ (5814)  
14 43 iron/ad, dt, th [Drug Administration, Drug Therapy, Therapy] (13258)  
15 44 ferritin/ad, dt [Drug Administration, Drug Therapy] (211)  
16 45 ferrous ion/ad, dt [Drug Administration, Drug Therapy] (413)  
17 46 ((ferric or ferritin\* or ferrous or iron) adj3 (administer\* or administration\* or dietary or  
18 replac\* or supplement\* or therap\* or treatment\*).tw,kw. (33100)  
19 47 (iron adj3 (capsule\* or infusion\* or injection\* or intravenous\* or IV or parenteral\* or pill or  
20 pills or medication\* or tablet\*).tw,kw. (10147)  
21 48 iron/ and diet supplementation/ (3538)  
22 49 ferrous sulfate/ (6637)  
23 50 (ferrous sulfate or ferrous sulphate or aktiferrin or apo-ferrous sulfate or auryxia or bifera or  
24 biofer or ceferro or conferon or eisendragees-ratiopharm or eisensulfat stada or elite iron or  
25 femiron or feosol or feospan or fer-gen-sol or fer-in-sol or feratab or fergon or ferodan or fero-  
26 gradumet or ferro-gradumet or ferogradumet or ferrex 150 or ferrogamma or ferrograd or  
27 haemoprotect or hemobion or hemofer or hamatopan or haematopan or kendural or "Mol-Iron" or  
28 plastufer or "Slow-Fe" or vitaferro kapseln).tw,kw. (4979)  
29 51 ferrous fumarate/ (831)  
30 52 (ferrous fumarate or feostat or ferrocap or fersaday or fersamal or ferval or fumar or galfer  
31 or ircon or nephro-fer or palafer or rulofer).tw,kw. (510)  
32 53 ferrous gluconate/ (1490)  
33 54 (ferrous gluconate or apo-ferrous gluconate or dextriferron or eisen-sandoz or "FeG Iron" or  
34 ferroglucon or ferrogluconaat or ferrum verla or loesferron or losferron or simron or vitaferro  
35 brause).tw,kw. (226)  
36 55 or/38-54 (62415)  
37 56 37 and 55 (22461)  
38 57 randomized controlled trial/ or controlled clinical trial/ (1035658)  
39 58 exp "clinical trial (topic)" / (172053)  
40 59 (randomi#ed or randomly or RCT\$1 or placebo\*).tw. (1644668)  
41 60 ((singl\* or doubl\* or trebl\* or tripl\*) adj (mask\* or blind\* or dumm\*).tw. (324774)  
42 61 trial.ti. (344352)  
43 62 or/57-61 (2260510)  
44 63 56 and 62 (3652)  
45 64 exp animal experimentation/ or exp models animal/ or exp animal experiment/ or  
46 nonhuman/ or exp vertebrate/ (40209729)  
47 65 exp humans/ or exp human experimentation/ or exp human experiment/ (31154163)  
48 66 64 not 65 (9057215)  
49 67 63 not 66 (3517)  
50 68 editorial.pt. (898431)  
51 69 letter.pt. not (letter.pt. and randomized controlled trial/) (1866594)  
52 70 67 not (68 or 69) (3492)  
53 71 70 use oemez (2075)  
54  
55  
56  
57  
58  
59  
60



- 1
  - 2
  - 3
  - 4
  - 5
  - 6
  - 7
  - 8
  - 9
  - 10
  - 11
  - 12
  - 13
  - 14
  - 15
  - 16
  - 17
  - 18
  - 19
  - 20
  - 21
  - 22
  - 23
  - 24
  - 25
  - 26
  - 27
  - 28
  - 29
  - 30
  - 31
  - 32
  - 33
  - 34
  - 35
  - 36
  - 37
  - 38
  - 39
  - 40
  - 41
  - 42
  - 43
  - 44
  - 45
  - 46
  - 47
  - 48
  - 49
  - 50
  - 51
  - 52
  - 53
  - 54
  - 55
  - 56
  - 57
  - 58
  - 59
  - 60
- 72 33 or 71 (3448)
- 73 remove duplicates from 72 (2408) [TOTAL UNIQUE RECORDS]
- 74 73 use prmz (1319) [MEDLINE UNIQUE RECORDS]
- 75 73 use oemez (1089) [EMBASE UNIQUE RECORDS]

For peer review only

Appendix 4. Funnel plot of studies which captured VO<sub>2</sub> max

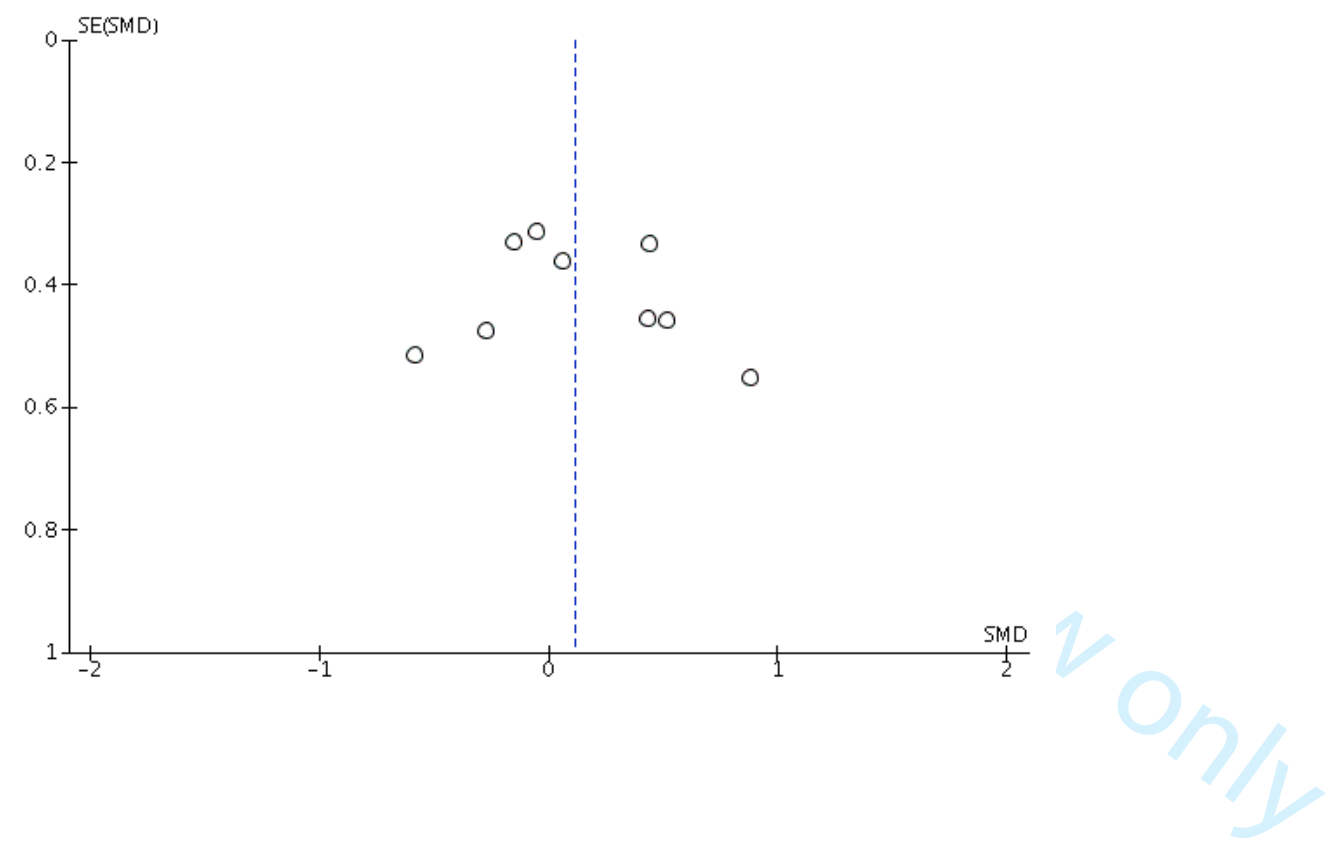

### Appendix 5. Physical capacity tests investigated among the trials reporting measures of physical capacity

| Study                    | Population details                 | Work capacity tests                                                                                    | Intervention outcomes                                                                                                                                                                                                                                                     |
|--------------------------|------------------------------------|--------------------------------------------------------------------------------------------------------|---------------------------------------------------------------------------------------------------------------------------------------------------------------------------------------------------------------------------------------------------------------------------|
| Brownlie <sup>19</sup>   | Physically active untrained women  | VO <sub>2</sub> max<br>RER, HRmax<br>15km time trial<br>TT RER, TT VO <sub>2</sub> max,<br>TT lactates | Significant increases in VO <sub>2</sub> max and decreases in RER in iron treated group compared to placebo; no difference in HRmax<br>Significant reduction in TT in iron group compared to placebo; no differences between TT RER, TT %VO <sub>2</sub> max, TT lactates |
| Brutsaert <sup>20</sup>  | Untrained women                    | Dynamic knee extension to fatigue                                                                      | Significant reduction in MVC decline in iron group compared to placebo                                                                                                                                                                                                    |
| Burden <sup>27</sup>     | University endurance runners       | VO <sub>2</sub><br>Time to exhaustion<br>RPE                                                           | No significant difference in VO <sub>2</sub> max, time to exhaustion or RPE in iron group compared to placebo.                                                                                                                                                            |
| Fogelholm <sup>30</sup>  | Female athletes                    | VO <sub>2</sub> max<br>Lactate levels                                                                  | No significant difference in VO <sub>2</sub> max and lactate levels between iron and placebo group                                                                                                                                                                        |
| Hinton <sup>22</sup>     | Recreationally trained individuals | VO <sub>2</sub> max<br>Submaximal test<br>Ventilatory threshold                                        | Significant improvements in gross energetic efficiency and VT among iron groups compared to placebo; no significant difference in VO <sub>2</sub> max between groups                                                                                                      |
| Klingshirn <sup>23</sup> | Female endurance runners           | VO <sub>2</sub> max<br>Time to exhaustion<br>Lactate threshold                                         | No significant differences in all measures between iron group and placebo                                                                                                                                                                                                 |
| LaManca <sup>26</sup>    | Healthy females                    | VO <sub>2</sub> max<br>Time to exhaustion<br>RER, HR, lactate                                          | Significant increases in VO <sub>2</sub> max in iron group compared to placebo; no difference in time to exhaustion, RER, HR or lactate.                                                                                                                                  |
| Newhouse <sup>24</sup>   | Young women                        | VO <sub>2</sub> max<br>Wingate anaerobic test<br>Anaerobic speed test                                  | No significant differences were observed between iron group and placebo                                                                                                                                                                                                   |

1  
2  
3  
4  
5  
6  
7  
8  
9  
10  
11  
12  
13  
14  
15  
16  
17  
18  
19  
20  
21  
22  
23  
24  
25  
26  
27  
28  
29  
30  
31  
32  
33  
34  
35  
36  
37  
38  
39  
40  
41  
42  
43  
44  
45  
46  
47

|                       |                                    |                                                                         |                                                                            |
|-----------------------|------------------------------------|-------------------------------------------------------------------------|----------------------------------------------------------------------------|
|                       |                                    | Ventilatory threshold<br>Muscle enzyme<br>assessments                   |                                                                            |
| Peeling <sup>34</sup> | Well-trained<br>female<br>athletes | VO <sub>2</sub> max<br>Submaximal economy<br>test<br>Time to exhaustion | No significant differences were observed between iron and placebo<br>group |
| Zhu <sup>25</sup>     | Physically<br>active women         | VO <sub>2</sub> max<br>15km time trial<br>TT lactates                   | No significant differences were observed between iron and placebo<br>group |

RER = respiratory exchange ratio; HRmax = maximum heart rate; km = kilometer; TT = time trial; RPE = rated perceived exertion;  
MVC = maximum ventilator capacity

## Appendix 6. Subgroup analysis for fatigue

| Subgroup                             | Studies          | Participants (iron) | Participants (control) | Effect estimate (95% CI) | I <sup>2</sup> Value | Across Subgroups                |
|--------------------------------------|------------------|---------------------|------------------------|--------------------------|----------------------|---------------------------------|
| <b>Method of iron administration</b> |                  |                     |                        |                          |                      |                                 |
| Oral                                 | <sup>32,33</sup> | 173                 | 161                    | SMD -0.39 (-0.61, -0.18) | 0%                   | p = 0.82<br>I <sup>2</sup> = 0% |
| Intravenous                          | <sup>28,31</sup> | 187                 | 193                    | SMD -0.36 (-0.56, -0.16) | 0%                   |                                 |
| <b>Duration of study follow-up</b>   |                  |                     |                        |                          |                      |                                 |
| <2 months                            | <sup>28,33</sup> | 215                 | 211                    | SMD -0.43 (-0.62, -0.23) | 0%                   | p = 0.41<br>I <sup>2</sup> = 0% |
| >2 months                            | <sup>31,32</sup> | 145                 | 143                    | SMD -0.30 (-0.53, -0.07) | 0%                   |                                 |

Biologic sex, athletic status (athlete vs. non-athlete) and risk of bias subgroup analyses were unevaluable in subgroup analyses as all participants were females, of uncategorized athletic status. All trials were of unclear risk of bias. CI = confidence interval; SMD = standardized mean difference

1  
2  
3  
4  
5  
6  
7  
8  
9  
10  
11  
12  
13  
14  
15  
16  
17  
18  
19  
20  
21  
22  
23  
24  
25  
26  
27  
28  
29  
30  
31  
32  
33  
34  
35  
36  
37  
38  
39  
40  
41  
42  
43  
44  
45  
46  
47

**Appendix 7. Subgroup analysis for physical capacity**

| Subgroup                             | Studies           | Participants (iron) | Participants (control) | Effect estimate (95% CI) | I <sup>2</sup> Value | Across Subgroups                 |
|--------------------------------------|-------------------|---------------------|------------------------|--------------------------|----------------------|----------------------------------|
| <b>Population</b>                    |                   |                     |                        |                          |                      |                                  |
| Athlete                              | 22-24,26,27,30,34 | 77                  | 80                     | SMD 0.22 (-0.10, 0.55)   | 3%                   | p = 0.25<br>I <sup>2</sup> = 24% |
| Non-athlete                          | 19,25             | 42                  | 36                     | SMD -0.10 (-0.55, 0.35)  | 0%                   |                                  |
| <b>Method of iron administration</b> |                   |                     |                        |                          |                      |                                  |
| Oral                                 | 19,22-26,30       | 104                 | 100                    | SMD 0.12 (-0.16, -0.39)  | 0%                   | p = 0.15<br>I <sup>2</sup> = 47% |
| IV                                   | 27                | 7                   | 8                      | SMD 0.88 (-0.20, 1.95)   | NA                   |                                  |
| IM                                   | 34                | 8                   | 8                      | SMD -0.59 (-1.59, 0.42)  | NA                   |                                  |

Biologic sex, duration of follow-up and risk of bias subgroup analyses were unevaluable in subgroup analyses as all trials enrolled females and had a follow-up period of less than two months. All trials were of unclear risk of bias. CI = confidence interval; SMD = standardized mean difference; IV = intravenous; IM = intramuscular

**Appendix 8. Effect of iron supplementation on serum hemoglobin**

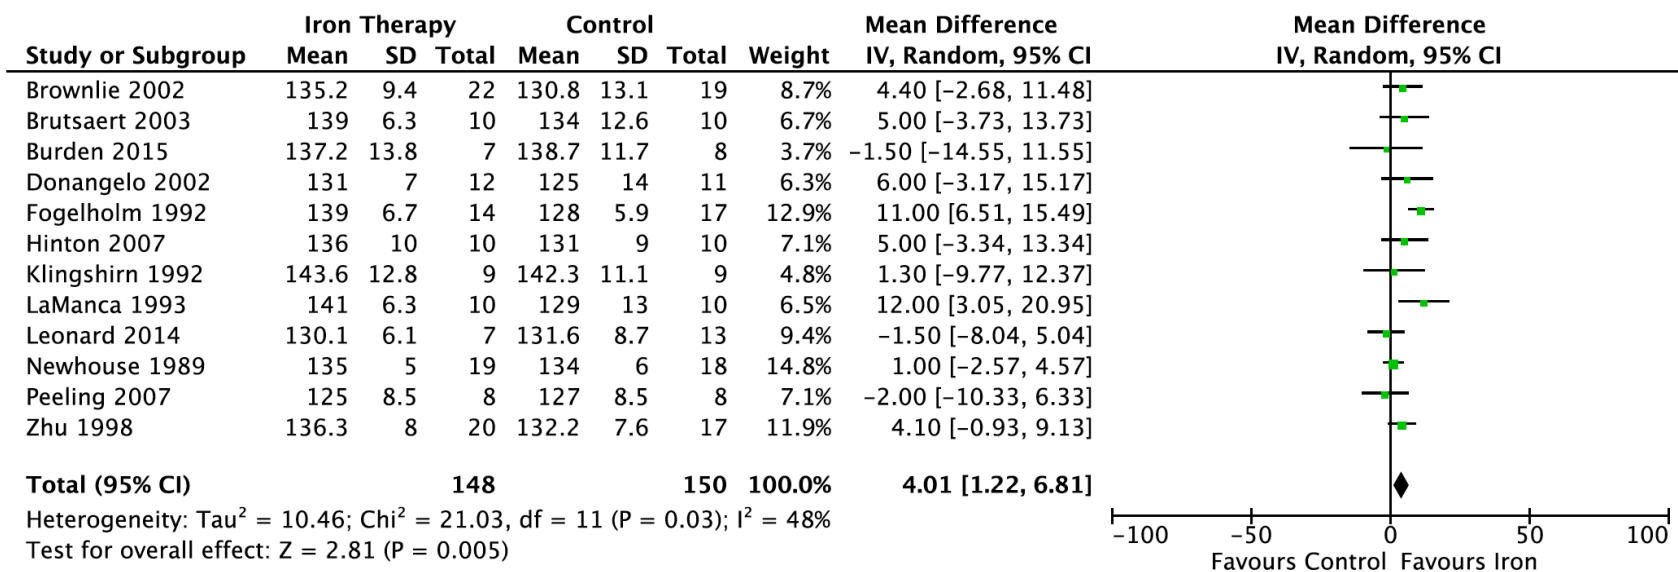

1  
2  
3  
4  
5  
6  
7  
8  
9  
10  
11  
12  
13  
14  
15  
16  
17  
18  
19  
20  
21  
22  
23  
24  
25  
26  
27  
28  
29  
30  
31  
32  
33  
34  
35  
36  
37  
38  
39  
40  
41  
42  
43  
44  
45  
46  
47

### Appendix 9. Effect of iron supplementation on serum ferritin

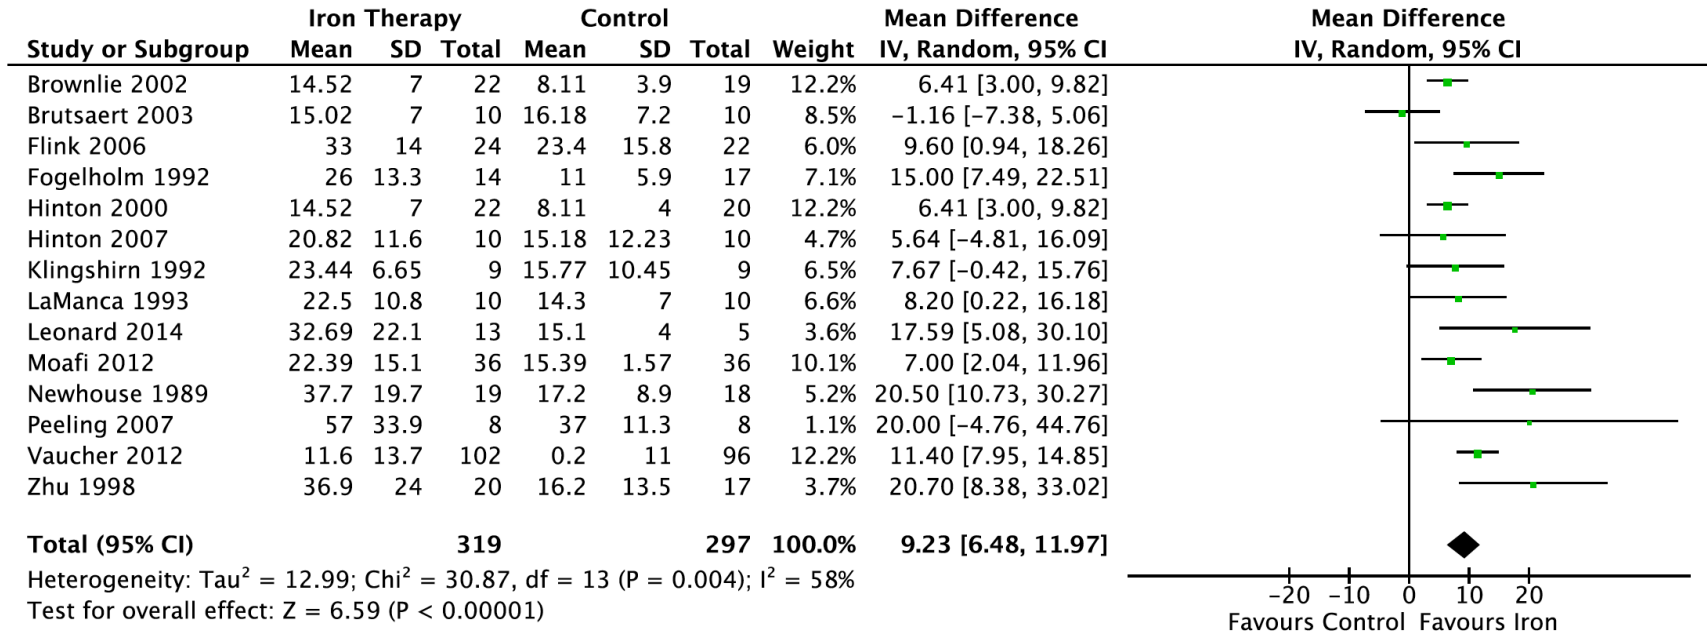



### Appendix 10. Adverse effects in trials of iron supplementation in iron-deficient, non-anemic individuals

| Study                     | Constipation                                                                                                                                                               | Diarrhea            | Nausea              | GI intolerance        |
|---------------------------|----------------------------------------------------------------------------------------------------------------------------------------------------------------------------|---------------------|---------------------|-----------------------|
| <b>Intravenous</b>        |                                                                                                                                                                            |                     |                     |                       |
| Burden <sup>27</sup>      | NR                                                                                                                                                                         | NR                  | NR                  | NR                    |
| Favrat <sup>28</sup>      | NR                                                                                                                                                                         | NR                  | Iron: 8; Control: 2 | NR                    |
| Krayenbuehl <sup>31</sup> | NR                                                                                                                                                                         | Iron: 0; Control: 1 | Iron: 6; Control: 1 | NR                    |
| <b>Intramuscular</b>      |                                                                                                                                                                            |                     |                     |                       |
| Flink <sup>29</sup>       | NR                                                                                                                                                                         | NR                  | NR                  | Iron: 14; Control: 2  |
| <b>Oral</b>               |                                                                                                                                                                            |                     |                     |                       |
| Brownlie <sup>19</sup>    | NR                                                                                                                                                                         | NR                  | NR                  | NR                    |
| Brutsaert <sup>20</sup>   | “Frequency and severity of reported side effects due to supplementation was very low and did not differ significantly between groups”                                      |                     |                     |                       |
| Donangelo <sup>21</sup>   | NR                                                                                                                                                                         | NR                  | NR                  | NR                    |
| Fogelholm <sup>30</sup>   | NR                                                                                                                                                                         | NR                  | NR                  | NR                    |
| Hinton <sup>22</sup>      | NR                                                                                                                                                                         | NR                  | NR                  | NR                    |
| Klingshirn <sup>23</sup>  | NR                                                                                                                                                                         | NR                  | NR                  | Iron: 1; Control: 0   |
| LaManca <sup>26</sup>     | NR                                                                                                                                                                         | NR                  | NR                  | NR                    |
| Leonard <sup>18</sup>     | Iron: 1; Control: 0                                                                                                                                                        | Iron: 2; Control: 2 | Iron: 2; Control: 1 | NR                    |
| Moafi <sup>35</sup>       | “When symptoms occurring immediately before or during menses were excluded, there were no significant differences either in frequency or severity of symptoms experienced” |                     |                     |                       |
| Newhouse <sup>24</sup>    | NR                                                                                                                                                                         | NR                  | NR                  | NR                    |
| Peeling <sup>34</sup>     | NR                                                                                                                                                                         | NR                  | NR                  | NR                    |
| Vaucher <sup>32</sup>     | NR                                                                                                                                                                         | NR                  | NR                  | Iron: 12; Control: 10 |
| Verdon <sup>33</sup>      | NR                                                                                                                                                                         | NR                  | Iron: 0; control: 1 | NR                    |
| Zhu <sup>25</sup>         | NR                                                                                                                                                                         | NR                  | NR                  | NR                    |

NR, not reported; GI, gastrointestinal

### Appendix 11. Compliance with the study intervention

|                           | Iron (%) | Control (%) |
|---------------------------|----------|-------------|
| <b>Intravenous</b>        |          |             |
| Burden <sup>27</sup>      | 100      | 100         |
| Favrat <sup>28</sup>      | 100      | 100         |
| Krayenbuehl <sup>31</sup> | NR       | NR          |
| <b>Intramuscular</b>      |          |             |
| Peeling <sup>34</sup>     | NR       | NR          |
| <b>Oral</b>               |          |             |
| Brownlie <sup>19</sup>    | 91       | 89          |
| Brutsaert <sup>20</sup>   | NR       | NR          |
| Donangelo <sup>21</sup>   | NR       | NR          |
| Flink <sup>29</sup>       | 71       | 82          |
| Fogelholm <sup>30</sup>   | NR       | NR          |
| Hinton <sup>22</sup>      | 98       | 99          |
| Klingshirn <sup>23</sup>  | 89       | 91          |
| LaManca <sup>26</sup>     | 82       | 85          |
| Leonard <sup>18*</sup>    | 89       | 92          |
| Moafi <sup>35</sup>       | 89       | 92          |
| Newhouse <sup>24</sup>    | >75      | >75         |
| Vaucher <sup>32</sup>     | 93       | 94          |
| Verdon <sup>33</sup>      | 95       | 98          |
| Zhu <sup>25</sup>         | 88       | 87          |

\* weighted averaged between two iron treatment groups; NR = not reported



# PRISMA 2009 Checklist

| Section/topic                      | #  | Checklist item                                                                                                                                                                                                                                                                                              | Reported on page # |
|------------------------------------|----|-------------------------------------------------------------------------------------------------------------------------------------------------------------------------------------------------------------------------------------------------------------------------------------------------------------|--------------------|
| <b>TITLE</b>                       |    |                                                                                                                                                                                                                                                                                                             |                    |
| Title                              | 1  | Identify the report as a systematic review, meta-analysis, or both.                                                                                                                                                                                                                                         | 1                  |
| <b>ABSTRACT</b>                    |    |                                                                                                                                                                                                                                                                                                             |                    |
| Structured summary                 | 2  | Provide a structured summary including, as applicable: background; objectives; data sources; study eligibility criteria, participants, and interventions; study appraisal and synthesis methods; results; limitations; conclusions and implications of key findings; systematic review registration number. | 2                  |
| <b>INTRODUCTION</b>                |    |                                                                                                                                                                                                                                                                                                             |                    |
| Rationale                          | 3  | Describe the rationale for the review in the context of what is already known.                                                                                                                                                                                                                              | 4                  |
| Objectives                         | 4  | Provide an explicit statement of questions being addressed with reference to participants, interventions, comparisons, outcomes, and study design (PICOS).                                                                                                                                                  | 6                  |
| <b>METHODS</b>                     |    |                                                                                                                                                                                                                                                                                                             |                    |
| Protocol and registration          | 5  | Indicate if a review protocol exists, if and where it can be accessed (e.g., Web address), and, if available, provide registration information including registration number.                                                                                                                               | 5                  |
| Eligibility criteria               | 6  | Specify study characteristics (e.g., PICOS, length of follow-up) and report characteristics (e.g., years considered, language, publication status) used as criteria for eligibility, giving rationale.                                                                                                      | 6                  |
| Information sources                | 7  | Describe all information sources (e.g., databases with dates of coverage, contact with study authors to identify additional studies) in the search and date last searched.                                                                                                                                  | 6                  |
| Search                             | 8  | Present full electronic search strategy for at least one database, including any limits used, such that it could be repeated.                                                                                                                                                                               | Supp 3             |
| Study selection                    | 9  | State the process for selecting studies (i.e., screening, eligibility, included in systematic review, and, if applicable, included in the meta-analysis).                                                                                                                                                   | 7                  |
| Data collection process            | 10 | Describe method of data extraction from reports (e.g., piloted forms, independently, in duplicate) and any processes for obtaining and confirming data from investigators.                                                                                                                                  | 7                  |
| Data items                         | 11 | List and define all variables for which data were sought (e.g., PICOS, funding sources) and any assumptions and simplifications made.                                                                                                                                                                       | 6                  |
| Risk of bias in individual studies | 12 | Describe methods used for assessing risk of bias of individual studies (including specification of whether this was done at the study or outcome level), and how this information is to be used in any data synthesis.                                                                                      | 7                  |
| Summary measures                   | 13 | State the principal summary measures (e.g., risk ratio, difference in means).                                                                                                                                                                                                                               | 8                  |
| Synthesis of results               | 14 | Describe the methods of handling data and combining results of studies, if done, including measures of consistency (e.g., $I^2$ ) for each meta-analysis.                                                                                                                                                   | 8                  |



# PRISMA 2009 Checklist

Page 1 of 2

| Section/topic                 | #  | Checklist item                                                                                                                                                                                           | Reported on page # |
|-------------------------------|----|----------------------------------------------------------------------------------------------------------------------------------------------------------------------------------------------------------|--------------------|
| Risk of bias across studies   | 15 | Specify any assessment of risk of bias that may affect the cumulative evidence (e.g., publication bias, selective reporting within studies).                                                             | 7                  |
| Additional analyses           | 16 | Describe methods of additional analyses (e.g., sensitivity or subgroup analyses, meta-regression), if done, indicating which were pre-specified.                                                         | 8                  |
| <b>RESULTS</b>                |    |                                                                                                                                                                                                          |                    |
| Study selection               | 17 | Give numbers of studies screened, assessed for eligibility, and included in the review, with reasons for exclusions at each stage, ideally with a flow diagram.                                          | 9, Fig 1           |
| Study characteristics         | 18 | For each study, present characteristics for which data were extracted (e.g., study size, PICOS, follow-up period) and provide the citations.                                                             | 9                  |
| Risk of bias within studies   | 19 | Present data on risk of bias of each study and, if available, any outcome level assessment (see item 12).                                                                                                | 9                  |
| Results of individual studies | 20 | For all outcomes considered (benefits or harms), present, for each study: (a) simple summary data for each intervention group (b) effect estimates and confidence intervals, ideally with a forest plot. | 9, Fig 2           |
| Synthesis of results          | 21 | Present results of each meta-analysis done, including confidence intervals and measures of consistency.                                                                                                  | 10                 |
| Risk of bias across studies   | 22 | Present results of any assessment of risk of bias across studies (see Item 15).                                                                                                                          | 10, 11             |
| Additional analysis           | 23 | Give results of additional analyses, if done (e.g., sensitivity or subgroup analyses, meta-regression [see Item 16]).                                                                                    | 12                 |
| <b>DISCUSSION</b>             |    |                                                                                                                                                                                                          |                    |
| Summary of evidence           | 24 | Summarize the main findings including the strength of evidence for each main outcome; consider their relevance to key groups (e.g., healthcare providers, users, and policy makers).                     | 13                 |
| Limitations                   | 25 | Discuss limitations at study and outcome level (e.g., risk of bias), and at review-level (e.g., incomplete retrieval of identified research, reporting bias).                                            | 14                 |
| Conclusions                   | 26 | Provide a general interpretation of the results in the context of other evidence, and implications for future research.                                                                                  | 15                 |
| <b>FUNDING</b>                |    |                                                                                                                                                                                                          |                    |
| Funding                       | 27 | Describe sources of funding for the systematic review and other support (e.g., supply of data); role of funders for the systematic review.                                                               | 16                 |

From: Moher D, Liberati A, Tetzlaff J, Altman DG, The PRISMA Group (2009). Preferred Reporting Items for Systematic Reviews and Meta-Analyses: The PRISMA Statement. PLoS Med 6(6): e1000097. doi:10.1371/journal.pmed1000097

For more information, visit: [www.prisma-statement.org](http://www.prisma-statement.org).

Page 2 of 2

For peer review only - <http://bmjopen.bmj.com/site/about/guidelines.xhtml>
