# Supplementary material for: Efficacy of iron supplementation on fatigue and physical capacity in non-anaemic iron-deficient adults: a systematic review of randomised controlled trials
Source: PubMed Central journal article supplement — BMJ Open. 2018 Apr 5;8(4):e019240. doi: 10.1136/bmjopen-2017-019240 (PMC5892776; doi:10.1136/bmjopen-2017-019240), 2018-04-05
Supplement: bmjopen-2017-019240supp001.pdf [file bmjopen-2017-019240supp001.pdf]

## **Appendix 1. Inclusion criteria**

1. Non-anemic ( $\geq 80\%$ ): Indicated by study cutoff values, or hemoglobin concentration [Hb]  $\geq 130$  g/L (males),  $\geq 120$  g/L (females);
2. Adults ( $\geq 18$  yrs); ( $\geq 80\%$ )
3. Iron Depleted ( $\geq 80\%$ ): According to study specific definition
4. Iron therapy administered as oral / intramuscular / intravenous therapy, all therapy durations, doses and frequencies of administration will be included
5. Studies where outcomes are assessed  $\geq 28$  days from the initiation of oral iron therapy
6. Only prospective randomized trials will be considered.

## **Appendix 2. Exclusion criteria**

1. Studies involving animals;
2. Females who were pregnant or breastfeeding;
3. Individuals with fatigue ( $\geq 20\%$ ) identified as being the result of some other pathology (i.e. psychiatric diagnosis, thyroid, liver, rheumatic, renal, cardiovascular, pulmonary, or oncologic cause)
4. Studies involving surgical patients
5. Studies involving author identified blood donors or phlebotomy
6. Studies assessing the pharmacokinetic properties of iron compounds in healthy volunteers where the short term outcomes are expressed as the objective (<1 month)
7. Non-English studies
8. Observational study designs, quasi-randomized, cross-over, or cluster randomized trials will not be considered for this review.
9. Studies where no relevant primary or secondary outcomes of interest are reported
10. Dietary fortification studies

### Appendix 3. Search strategy

#### *Ovid Multifile (MEDLINE & Embase)*

Database: Embase <1974 to 2015 Week 47>, Ovid MEDLINE(R) In-Process & Other Non-Indexed Citations and Ovid MEDLINE(R) <1946 to Present>

Search Strategy:

- 
- 1 Iron/df (4519)
  - 2 exp Ferritins/df (87)
  - 3 exp Ferrous Compounds/df (1)
  - 4 ((decreased or deficien\* or deplet\* or inadequa\* or insufficien\* or low or marginal) adj3 (iron or ferritin\*).tw,kw. (55943)
  - 5 or/1-4 (57094)
  - 6 Anemia/pc [Prevention & Control] (3144)
  - 7 Anemia, Iron-Deficiency/pc [Prevention & Control] (2061)
  - 8 (prevent\* adj3 (anemi\* or anaemi\* or iron deficien\*).tw,kw. (2915)
  - 9 Deficiency Diseases/dt (968)
  - 10 Iron/ad, tu (8860)
  - 11 exp Ferritins/ad, tu (185)
  - 12 exp Ferrous Compounds/ad, tu (2094)
  - 13 ((ferric or ferritin\* or ferrous or iron) adj3 (administer\* or administration\* or dietary or replac\* or supplement\* or therap\* or treatment\*).tw,kw. (33100)
  - 14 (iron adj3 (capsule\* or infusion\* or injection\* or intravenous\* or IV or parenteral\* or pill or pills or medication\* or tablet\*).tw,kw. (10147)
  - 15 Iron/ and Dietary Supplements/ (4252)
  - 16 (ferrous sulfate or ferrous sulphate or aktiferrin or apo-ferrous sulfate or auryxia or bifera or biofer or ceferro or conferon or eisendragees-ratiopharm or eisensulfat stada or elite iron or femiron or feosol or feospan or fer-gen-sol or fer-in-sol or feratab or fergon or ferodan or fero-gradumet or ferro-gradumet or ferogradumet or ferrex 150 or ferrogamma or ferrogad or haemoprotect or hemobion or hemofer or hamatopan or haematopan or kendural or "Mol-Iron" or plastufer or "Slow-Fe" or vitaferro kapseln).tw,kw. (4979)
  - 17 (ferrous fumarate or feostat or ferrocap or fersaday or fersamal or ferval or fumar or galfer or ircon or nephro-fer or palafer or rulofer).tw,kw. (510)
  - 18 (ferrous gluconate or apo-ferrous gluconate or dextriferron or eisen-sandoz or "FeG Iron" or ferroglucon or ferrogluconaat or ferrum verla or loesferron or losferron or simron or vitaferro brause).tw,kw. (226)
  - 19 or/6-18 (55320)
  - 20 5 and 19 (17537)
  - 21 (controlled clinical trial or randomized controlled trial).pt. (504747)
  - 22 clinical trials as topic.sh. (180086)
  - 23 (randomi#ed or randomly or RCT\$1 or placebo\*).tw. (1644668)
  - 24 ((singl\* or doubl\* or trebl\* or tripl\*) adj (mask\* or blind\* or dumm\*).tw. (324774)
  - 25 trial.ti. (344352)
  - 26 or/21-25 (2079234)
  - 27 20 and 26 (2880)
  - 28 exp Animals/ not (exp Animals/ and Humans/) (9776432)
  - 29 27 not 28 (2641)
  - 30 (comment or editorial or interview or news).pt. (1640361)
  - 31 (letter not (letter and randomized controlled trial)).pt. (1871051)
  - 32 29 not (30 or 31) (2636)

33 32 use prmz (1373)  
34 iron deficiency/ (11754)  
35 iron deficiency anemia/ (28987)  
36 ((decreased or deficien\* or deplet\* or inadep\* or insufficien\* or low or marginal) adj3  
(iron or ferritin\*).tw,kw. (55943)  
37 or/34-36 (71135)  
38 anemia/pc [Prevention] (3144)  
39 iron deficiency anemia/pc [Prevention] (2269)  
40 (prevent\* adj3 (anemi\* or anaemi\* or iron deficien\*).tw,kw. (2915)  
41 iron deficiency/dt [Drug Therapy] (1631)  
42 iron therapy/ (5814)  
43 iron/ad, dt, th [Drug Administration, Drug Therapy, Therapy] (13258)  
44 ferritin/ad, dt [Drug Administration, Drug Therapy] (211)  
45 ferrous ion/ad, dt [Drug Administration, Drug Therapy] (413)  
46 ((ferric or ferritin\* or ferrous or iron) adj3 (administer\* or administration\* or dietary or  
replac\* or supplement\* or therap\* or treatment\*).tw,kw. (33100)  
47 (iron adj3 (capsule\* or infusion\* or injection\* or intravenous\* or IV or parenteral\* or pill or  
pills or medication\* or tablet\*).tw,kw. (10147)  
48 iron/ and diet supplementation/ (3538)  
49 ferrous sulfate/ (6637)  
50 (ferrous sulfate or ferrous sulphate or aktiferrin or apo-ferrous sulfate or auryxia or bifera or  
biofer or ceferro or conferon or eisendragees-ratiopharm or eisensulfat stada or elite iron or  
femiron or feosol or feospan or fer-gen-sol or fer-in-sol or feratab or fergon or ferodan or fero-  
gradumet or ferro-gradumet or ferogradumet or ferrex 150 or ferrogamma or ferrograd or  
haemoprotect or hemobion or hemofer or hamatopan or haematopan or kendural or "Mol-Iron" or  
plastufer or "Slow-Fe" or vitaferro kapseln).tw,kw. (4979)  
51 ferrous fumarate/ (831)  
52 (ferrous fumarate or feostat or ferrocap or fersaday or fersamal or ferval or fumar or galfer  
or ircon or nephro-fer or palafer or rulofer).tw,kw. (510)  
53 ferrous gluconate/ (1490)  
54 (ferrous gluconate or apo-ferrous gluconate or dextriferron or eisen-sandoz or "FeG Iron" or  
ferroglucon or ferrogluconaat or ferrum verla or loesferron or losferron or simron or vitaferro  
brause).tw,kw. (226)  
55 or/38-54 (62415)  
56 37 and 55 (22461)  
57 randomized controlled trial/ or controlled clinical trial/ (1035658)  
58 exp "clinical trial (topic)"/ (172053)  
59 (randomi#ed or randomly or RCT\$1 or placebo\*).tw. (1644668)  
60 ((singl\* or doubl\* or trebl\* or tripl\*) adj (mask\* or blind\* or dumm\*).tw. (324774)  
61 trial.ti. (344352)  
62 or/57-61 (2260510)  
63 56 and 62 (3652)  
64 exp animal experimentation/ or exp models animal/ or exp animal experiment/ or  
nonhuman/ or exp vertebrate/ (40209729)  
65 exp humans/ or exp human experimentation/ or exp human experiment/ (31154163)  
66 64 not 65 (9057215)  
67 63 not 66 (3517)  
68 editorial.pt. (898431)  
69 letter.pt. not (letter.pt. and randomized controlled trial/) (1866594)  
70 67 not (68 or 69) (3492)  
71 70 use oemez (2075)

- 72 33 or 71 (3448)
- 73 remove duplicates from 72 (2408) [TOTAL UNIQUE RECORDS]
- 74 73 use prmz (1319) [MEDLINE UNIQUE RECORDS]
- 75 73 use oemez (1089) [EMBASE UNIQUE RECORDS]

#### Appendix 4. Funnel plot of studies which captured VO<sub>2</sub> max

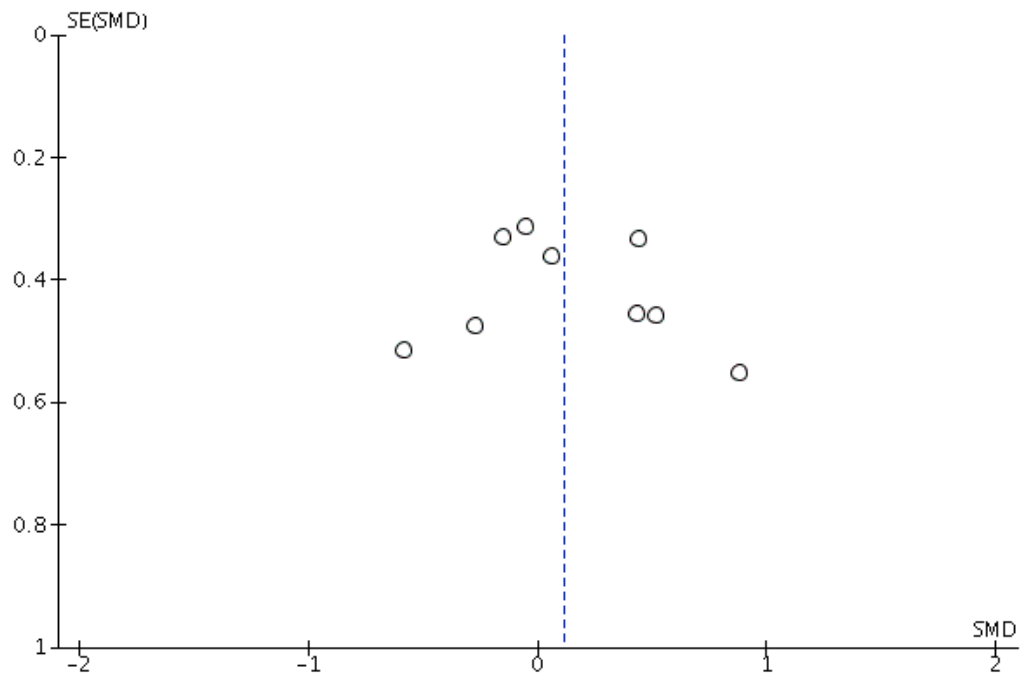

### Appendix 5. Physical capacity tests investigated among the trials reporting measures of physical capacity

| Study                    | Population details                 | Work capacity tests                                                                                    | Intervention outcomes                                                                                                                                                                                                                                                     |
|--------------------------|------------------------------------|--------------------------------------------------------------------------------------------------------|---------------------------------------------------------------------------------------------------------------------------------------------------------------------------------------------------------------------------------------------------------------------------|
| Brownlie <sup>19</sup>   | Physically active untrained women  | VO <sub>2</sub> max<br>RER, HRmax<br>15km time trial<br>TT RER, TT VO <sub>2</sub> max,<br>TT lactates | Significant increases in VO <sub>2</sub> max and decreases in RER in iron treated group compared to placebo; no difference in HRmax<br>Significant reduction in TT in iron group compared to placebo; no differences between TT RER, TT %VO <sub>2</sub> max, TT lactates |
| Brutsaert <sup>20</sup>  | Untrained women                    | Dynamic knee extension to fatigue                                                                      | Significant reduction in MVC decline in iron group compared to placebo                                                                                                                                                                                                    |
| Burden <sup>27</sup>     | University endurance runners       | VO <sub>2</sub><br>Time to exhaustion<br>RPE                                                           | No significant difference in VO <sub>2</sub> max, time to exhaustion or RPE in iron group compared to placebo.                                                                                                                                                            |
| Fogelholm <sup>30</sup>  | Female athletes                    | VO <sub>2</sub> max<br>Lactate levels                                                                  | No significant difference in VO <sub>2</sub> max and lactate levels between iron and placebo group                                                                                                                                                                        |
| Hinton <sup>22</sup>     | Recreationally trained individuals | VO <sub>2</sub> max<br>Submaximal test<br>Ventilatory threshold                                        | Significant improvements in gross energetic efficiency and VT among iron groups compared to placebo; no significant difference in VO <sub>2</sub> max between groups                                                                                                      |
| Klingshirn <sup>23</sup> | Female endurance runners           | VO <sub>2</sub> max<br>Time to exhaustion<br>Lactate threshold                                         | No significant differences in all measures between iron group and placebo                                                                                                                                                                                                 |
| LaManca <sup>26</sup>    | Healthy females                    | VO <sub>2</sub> max<br>Time to exhaustion<br>RER, HR, lactate                                          | Significant increases in VO <sub>2</sub> max in iron group compared to placebo; no difference in time to exhaustion, RER, HR or lactate.                                                                                                                                  |
| Newhouse <sup>24</sup>   | Young women                        | VO <sub>2</sub> max<br>Wingate anaerobic test<br>Anaerobic speed test                                  | No significant differences were observed between iron group and placebo                                                                                                                                                                                                   |

|                       |                                    |                                                                         |                                                                            |
|-----------------------|------------------------------------|-------------------------------------------------------------------------|----------------------------------------------------------------------------|
|                       |                                    | Ventilatory threshold<br>Muscle enzyme<br>assessments                   |                                                                            |
| Peeling <sup>34</sup> | Well-trained<br>female<br>athletes | VO <sub>2</sub> max<br>Submaximal economy<br>test<br>Time to exhaustion | No significant differences were observed between iron and placebo<br>group |
| Zhu <sup>25</sup>     | Physically<br>active women         | VO <sub>2</sub> max<br>15km time trial<br>TT lactates                   | No significant differences were observed between iron and placebo<br>group |

RER = respiratory exchange ratio; HRmax = maximum heart rate; km = kilometer; TT = time trial; RPE = rated perceived exertion;  
MVC = maximum ventilator capacity



## Appendix 6. Subgroup analysis for fatigue

| Subgroup                             | Studies          | Participants (iron) | Participants (control) | Effect estimate (95% CI) | I <sup>2</sup> Value | Across Subgroups                |
|--------------------------------------|------------------|---------------------|------------------------|--------------------------|----------------------|---------------------------------|
| <b>Method of iron administration</b> |                  |                     |                        |                          |                      |                                 |
| Oral                                 | <sup>32,33</sup> | 173                 | 161                    | SMD -0.39 (-0.61, -0.18) | 0%                   | p = 0.82<br>I <sup>2</sup> = 0% |
| Intravenous                          | <sup>28,31</sup> | 187                 | 193                    | SMD -0.36 (-0.56, -0.16) | 0%                   |                                 |
| <b>Duration of study follow-up</b>   |                  |                     |                        |                          |                      |                                 |
| <2 months                            | <sup>28,33</sup> | 215                 | 211                    | SMD -0.43 (-0.62, -0.23) | 0%                   | p = 0.41<br>I <sup>2</sup> = 0% |
| >2 months                            | <sup>31,32</sup> | 145                 | 143                    | SMD -0.30 (-0.53, -0.07) | 0%                   |                                 |

Biologic sex, athletic status (athlete vs. non-athlete) and risk of bias subgroup analyses were unevaluable in subgroup analyses as all participants were females, of uncategorized athletic status. All trials were of unclear risk of bias. CI = confidence interval; SMD = standardized mean difference

## Appendix 7. Subgroup analysis for physical capacity

| Subgroup                             | Studies           | Participants (iron) | Participants (control) | Effect estimate (95% CI) | I <sup>2</sup> Value | Across Subgroups                 |
|--------------------------------------|-------------------|---------------------|------------------------|--------------------------|----------------------|----------------------------------|
| <b>Population</b>                    |                   |                     |                        |                          |                      |                                  |
| Athlete                              | 22-24,26,27,30,34 | 77                  | 80                     | SMD 0.22 (-0.10, 0.55)   | 3%                   | p = 0.25<br>I <sup>2</sup> = 24% |
| Non-athlete                          | 19,25             | 42                  | 36                     | SMD -0.10 (-0.55, 0.35)  | 0%                   |                                  |
| <b>Method of iron administration</b> |                   |                     |                        |                          |                      |                                  |
| Oral                                 | 19,22-26,30       | 104                 | 100                    | SMD 0.12 (-0.16, -0.39)  | 0%                   | p = 0.15<br>I <sup>2</sup> = 47% |
| IV                                   | 27                | 7                   | 8                      | SMD 0.88 (-0.20, 1.95)   | NA                   |                                  |
| IM                                   | 34                | 8                   | 8                      | SMD -0.59 (-1.59, 0.42)  | NA                   |                                  |

Biologic sex, duration of follow-up and risk of bias subgroup analyses were unevaluable in subgroup analyses as all trials enrolled females and had a follow-up period of less than two months. All trials were of unclear risk of bias. CI = confidence interval; SMD = standardized mean difference; IV = intravenous; IM = intramuscular

### Appendix 8. Effect of iron supplementation on serum hemoglobin

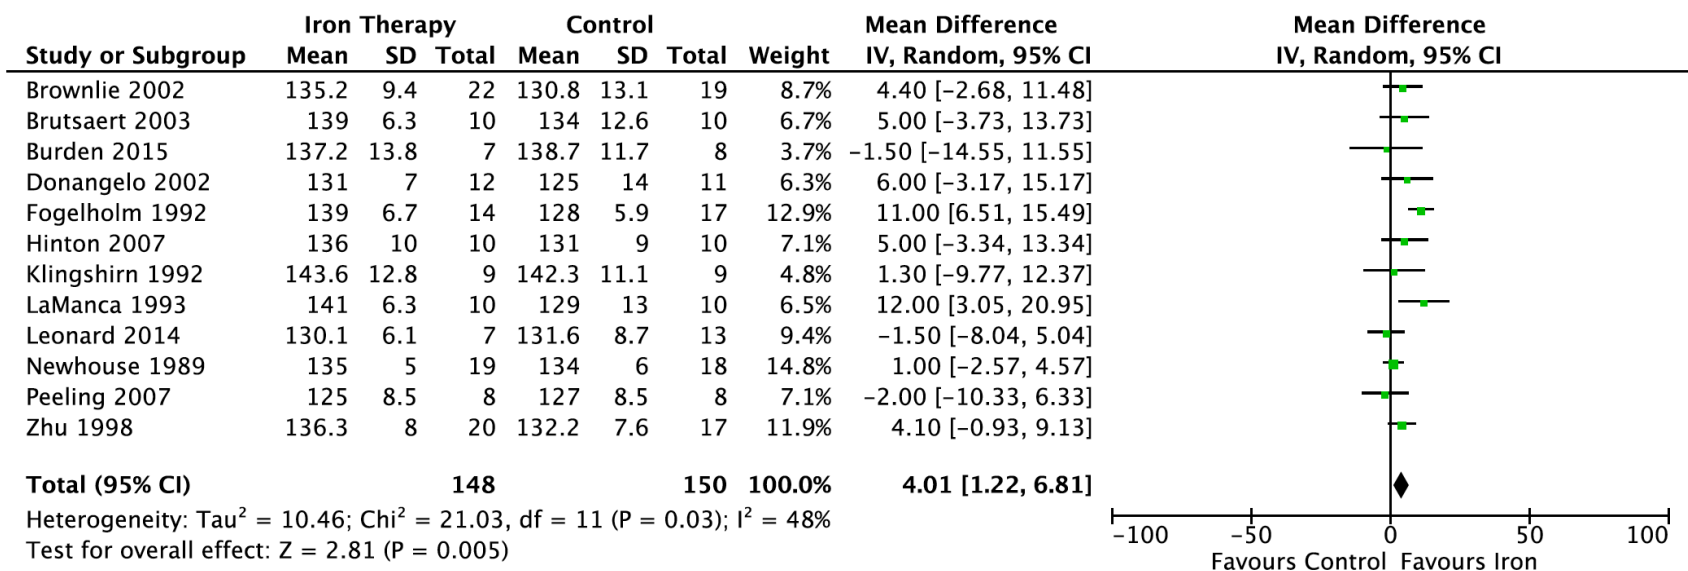

## Appendix 9. Effect of iron supplementation on serum ferritin

| Study or Subgroup     | Iron Therapy |      |            | Control |       |            | Weight        | Mean Difference<br>IV, Random, 95% CI |
|-----------------------|--------------|------|------------|---------|-------|------------|---------------|---------------------------------------|
|                       | Mean         | SD   | Total      | Mean    | SD    | Total      |               |                                       |
| Brownlie 2002         | 14.52        | 7    | 22         | 8.11    | 3.9   | 19         | 12.2%         | 6.41 [3.00, 9.82]                     |
| Brutsaert 2003        | 15.02        | 7    | 10         | 16.18   | 7.2   | 10         | 8.5%          | -1.16 [-7.38, 5.06]                   |
| Flink 2006            | 33           | 14   | 24         | 23.4    | 15.8  | 22         | 6.0%          | 9.60 [0.94, 18.26]                    |
| Fogelholm 1992        | 26           | 13.3 | 14         | 11      | 5.9   | 17         | 7.1%          | 15.00 [7.49, 22.51]                   |
| Hinton 2000           | 14.52        | 7    | 22         | 8.11    | 4     | 20         | 12.2%         | 6.41 [3.00, 9.82]                     |
| Hinton 2007           | 20.82        | 11.6 | 10         | 15.18   | 12.23 | 10         | 4.7%          | 5.64 [-4.81, 16.09]                   |
| Klingshirn 1992       | 23.44        | 6.65 | 9          | 15.77   | 10.45 | 9          | 6.5%          | 7.67 [-0.42, 15.76]                   |
| LaManca 1993          | 22.5         | 10.8 | 10         | 14.3    | 7     | 10         | 6.6%          | 8.20 [0.22, 16.18]                    |
| Leonard 2014          | 32.69        | 22.1 | 13         | 15.1    | 4     | 5          | 3.6%          | 17.59 [5.08, 30.10]                   |
| Moafi 2012            | 22.39        | 15.1 | 36         | 15.39   | 1.57  | 36         | 10.1%         | 7.00 [2.04, 11.96]                    |
| Newhouse 1989         | 37.7         | 19.7 | 19         | 17.2    | 8.9   | 18         | 5.2%          | 20.50 [10.73, 30.27]                  |
| Peeling 2007          | 57           | 33.9 | 8          | 37      | 11.3  | 8          | 1.1%          | 20.00 [-4.76, 44.76]                  |
| Vaucher 2012          | 11.6         | 13.7 | 102        | 0.2     | 11    | 96         | 12.2%         | 11.40 [7.95, 14.85]                   |
| Zhu 1998              | 36.9         | 24   | 20         | 16.2    | 13.5  | 17         | 3.7%          | 20.70 [8.38, 33.02]                   |
| <b>Total (95% CI)</b> |              |      | <b>319</b> |         |       | <b>297</b> | <b>100.0%</b> | <b>9.23 [6.48, 11.97]</b>             |

Heterogeneity:  $\tau^2 = 12.99$ ;  $\chi^2 = 30.87$ ,  $df = 13$  ( $P = 0.004$ );  $I^2 = 58\%$   
 Test for overall effect:  $Z = 6.59$  ( $P < 0.00001$ )

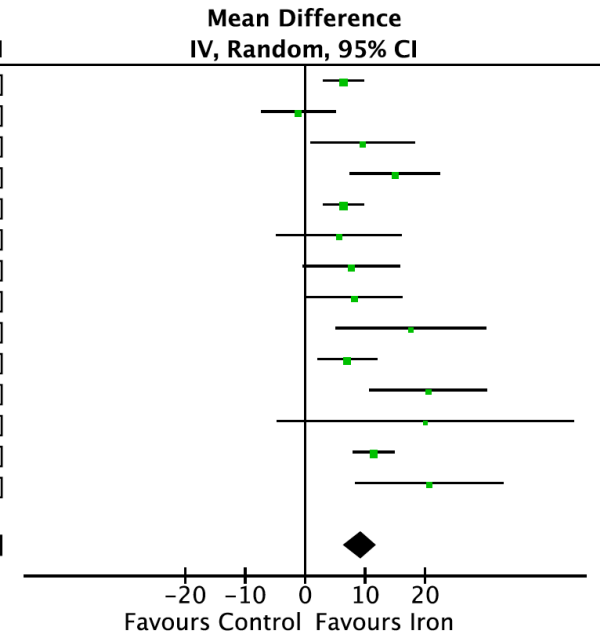

**Appendix 10. Adverse effects in trials of iron supplementation in iron-deficient, non-anemic individuals**

| <b>Study</b>              | <b>Constipation</b>                                                                                                                                                        | <b>Diarrhea</b>     | <b>Nausea</b>       | <b>GI intolerance</b> |
|---------------------------|----------------------------------------------------------------------------------------------------------------------------------------------------------------------------|---------------------|---------------------|-----------------------|
| <b>Intravenous</b>        |                                                                                                                                                                            |                     |                     |                       |
| Burden <sup>27</sup>      | NR                                                                                                                                                                         | NR                  | NR                  | NR                    |
| Favrat <sup>28</sup>      | NR                                                                                                                                                                         | NR                  | Iron: 8; Control: 2 | NR                    |
| Krayenbuehl <sup>31</sup> | NR                                                                                                                                                                         | Iron: 0; Control: 1 | Iron: 6; Control: 1 | NR                    |
| <b>Intramuscular</b>      |                                                                                                                                                                            |                     |                     |                       |
| Flink <sup>29</sup>       | NR                                                                                                                                                                         | NR                  | NR                  | Iron: 14; Control: 2  |
| <b>Oral</b>               |                                                                                                                                                                            |                     |                     |                       |
| Brownlie <sup>19</sup>    | NR                                                                                                                                                                         | NR                  | NR                  | NR                    |
| Brutsaert <sup>20</sup>   | “Frequency and severity of reported side effects due to supplementation was very low and did not differ significantly between groups”                                      |                     |                     |                       |
| Donangelo <sup>21</sup>   | NR                                                                                                                                                                         | NR                  | NR                  | NR                    |
| Fogelholm <sup>30</sup>   | NR                                                                                                                                                                         | NR                  | NR                  | NR                    |
| Hinton <sup>22</sup>      | NR                                                                                                                                                                         | NR                  | NR                  | NR                    |
| Klingshirn <sup>23</sup>  | NR                                                                                                                                                                         | NR                  | NR                  | Iron: 1; Control: 0   |
| LaManca <sup>26</sup>     | NR                                                                                                                                                                         | NR                  | NR                  | NR                    |
| Leonard <sup>18</sup>     | Iron: 1; Control: 0                                                                                                                                                        | Iron: 2; Control: 2 | Iron: 2; Control: 1 | NR                    |
| Moafi <sup>35</sup>       | “When symptoms occurring immediately before or during menses were excluded, there were no significant differences either in frequency or severity of symptoms experienced” |                     |                     |                       |
| Newhouse <sup>24</sup>    | NR                                                                                                                                                                         | NR                  | NR                  | NR                    |
| Peeling <sup>34</sup>     | NR                                                                                                                                                                         | NR                  | NR                  | NR                    |
| Vaucher <sup>32</sup>     | NR                                                                                                                                                                         | NR                  | NR                  | Iron: 12; Control: 10 |
| Verdon <sup>33</sup>      | NR                                                                                                                                                                         | NR                  | Iron: 0; control: 1 | NR                    |
| Zhu <sup>25</sup>         | NR                                                                                                                                                                         | NR                  | NR                  | NR                    |

NR, not reported; GI, gastrointestinal

### Appendix 11. Compliance with the study intervention

|                           | Iron (%) | Control (%) |
|---------------------------|----------|-------------|
| <b>Intravenous</b>        |          |             |
| Burden <sup>27</sup>      | 100      | 100         |
| Favrat <sup>28</sup>      | 100      | 100         |
| Krayenbuehl <sup>31</sup> | NR       | NR          |
| <b>Intramuscular</b>      |          |             |
| Peeling <sup>34</sup>     | NR       | NR          |
| <b>Oral</b>               |          |             |
| Brownlie <sup>19</sup>    | 91       | 89          |
| Brutsaert <sup>20</sup>   | NR       | NR          |
| Donangelo <sup>21</sup>   | NR       | NR          |
| Flink <sup>29</sup>       | 71       | 82          |
| Fogelholm <sup>30</sup>   | NR       | NR          |
| Hinton <sup>22</sup>      | 98       | 99          |
| Klingshirn <sup>23</sup>  | 89       | 91          |
| LaManca <sup>26</sup>     | 82       | 85          |
| Leonard <sup>18*</sup>    | 89       | 92          |
| Moafi <sup>35</sup>       | 89       | 92          |
| Newhouse <sup>24</sup>    | >75      | >75         |
| Vaucher <sup>32</sup>     | 93       | 94          |
| Verdon <sup>33</sup>      | 95       | 98          |
| Zhu <sup>25</sup>         | 88       | 87          |

\* weighted averaged between two iron treatment groups; NR = not reported
